# Supplementary material
Source: ML conference proceedings conference paper supplement (https://proceedings.neurips.cc/paper_files/paper/2021/hash/caaa29eab72b231b0af62fbdff89bfce-Abstract.html)
Supplement: Supplementary file 1 [file caaa29eab72b231b0af62fbdff89bfce-Supplemental.pdf]

---

# Supplementary material for: “Benign Overfitting in Multiclass Classification: All Roads Lead to Interpolation”

---

**Ke Wang**

Department of Statistics and Applied Probability  
University of California, Santa Barbara  
Santa Barbara, CA 93106  
kewang01@ucsb.edu

**Vidya Muthukumar**

School of Electrical and Computer Engineering & Industrial and Systems Engineering  
Georgia Institute of Technology  
Atlanta, GA 30332  
vmuthukumar8@gatech.edu

**Christos Thrampoulidis**

Department of Electrical and Computer Engineering  
University of British Columbia  
Vancouver, BC Canada V6T 1Z4  
cthrampo@ece.ubc.ca

## Abstract

The growing literature on “benign overfitting” in overparameterized models has been mostly restricted to regression or binary classification settings; however, most success stories of modern machine learning have been recorded in multiclass settings. Motivated by this discrepancy, we study benign overfitting in multiclass linear classification. Specifically, we consider the following popular training algorithms on separable data: (i) empirical risk minimization (ERM) with cross-entropy loss, which converges to the multiclass support vector machine (SVM) solution; (ii) ERM with least-squares loss, which converges to the min-norm interpolating (MNI) solution; and, (iii) the one-vs-all SVM classifier. Our first key finding is that under a simple sufficient condition, *all* three algorithms lead to classifiers that interpolate the training data and have equal accuracy. When the data is generated from Gaussian mixtures or a multinomial logistic model, this condition holds under high enough effective overparameterization. Second, we derive novel error bounds on the accuracy of the MNI classifier, thereby showing that all three training algorithms lead to benign overfitting under sufficient overparameterization. Ultimately, our analysis shows that good generalization is possible for SVM solutions beyond the realm in which typical margin-based bounds apply.

## Organization of the supplementary material

The supplementary material (SM) is organized as follows.

1. **Section A:** We present additional numerical experiments validating our theoretical findings throughout the paper. For completeness, we also present error bars computed over Monte Carlo realizations.
2. **Section B:** We provide a detailed proof of our key finding in Theorem 1.
3. **Section C:** We prove Theorem 2 on multiclass SVM interpolation for GMM data.
4. **Section D:** We prove Theorems 3 and 4 on multiclass SVM interpolation for MLM data.
5. **Section E:** We prove Theorems 3 and 4 on classification error of the MNI classifier for GMM and MLM data.
6. **Section F:** Here we derive recursive formulas for computing quadratic forms, which are required for the proofs in Sections C and E for GMM data.
7. **Section G:** We derive conditions under which the OvA-classifier interpolates the data for both GMM and MLM data. Thus, all three classifiers the (i) MNI, (ii) multiclass-SVM, and (iii) OvA-SVM lead to interpolation.

To ease readability and accessibility, we also opted to keep the main manuscript. The SM starts at page 18.

## 1 Introduction

Modern deep neural networks are *overparameterized* with respect to the amount of training data and achieve zero training error, yet generalize well on test data. Recent analysis has shown that fitting of noise in regression tasks can in fact be relatively benign for sufficiently high-dimensional linear models [BLLT20, BHX20, HMRT19, MVSS20, KLS20]. However, these analyses do not directly extend to classification, which requires separate treatment. In fact, very recent progress on sharp analysis of interpolating *binary* classifiers [MNS<sup>+</sup>20, CL21, WT21, CGB21] revealed high-dimensional regimes in which binary classification generalizes well, but the corresponding regression task does *not* work and/or the success *cannot* be predicted by classical margin-based bounds.

In an important separate development, these same high-dimensional regimes admit an equivalence of loss functions used at training time. The support vector machine (SVM), which arises from minimizing the logistic loss using gradient descent [SHN<sup>+</sup>18, JT19], was recently shown to satisfy a high-probability equivalence to interpolation, which arises from minimizing the squared loss [MNS<sup>+</sup>20, HMX21]. This equivalence suggests that interpolation is ubiquitous in very overparameterized settings, and can arise naturally as a consequence of the optimization procedure even when this is not explicitly encoded or intended. Moreover, this equivalence to interpolation and corresponding analysis implies that the SVM can generalize even in regimes where classical learning theory bounds are not predictive. In the logistic model case [MNS<sup>+</sup>20] and Gaussian binary mixture model case [CL21, WT21, CGB21], it is shown that good generalization of the SVM is possible beyond the realm in which classical margin-based bounds apply. These analyses lend theoretical grounding to the surprising hypothesis that *squared loss can be equivalent to, or possibly even superior*, to the cross-entropy loss for classification tasks. This hypothesis was supported empirically on kernel machines in Ryan Rifkin’s doctoral dissertation work [Rif02, RK04], and more recently in overparameterized neural networks [HB20, PL20].

These compelling perspectives have thus far been limited to regression and *binary* classification settings. In contrast, most success stories and surprising new phenomena of modern machine learning have been recorded in *multiclass* classification settings, which appear naturally in a host of applications that demand the ability to automatically distinguish between large numbers of different classes; for example, the popular ImageNet dataset [RDS<sup>+</sup>15] contains on the order of 1000 classes. Whether a) good generalization beyond effectively low-dimensional regimes where margin-based bounds are predictive is possible, and b) equivalence of squared loss and cross-entropy loss holds in multiclass settings remained open problems.

This paper makes significant progress towards a complete understanding of the optimization and generalization properties of high-dimensional linear multiclass classification, both for unconditional Gaussian covariates (where labels are generated via a multinomial logistic model), and high-dimensional Gaussian mixture models. Our contributions are listed in more detail below.

## 1.1 Our Contributions

- We establish a *deterministic* sufficient condition under which the multiclass SVM solution has a very simple and symmetric structure: it is identical to the solution of the One-vs-All (OvA) SVM classifier that uses the one-hot encoded labels. Moreover, the constraints at both solutions are active. Geometrically, this means that *all data points are support vectors*.
- This implies a surprising equivalence between traditionally different formulations of multiclass SVM, which in turn are equivalent to the minimum-norm interpolating (MNI) classifier on one-hot label vectors. Thus, the outcomes of training with cross-entropy (CE) loss and squared loss are identical.
- Next, for data following a Gaussian-mixtures model (GMM) or a Multinomial logistic model (MLM), we show that the above sufficient condition is satisfied with high-probability under sufficient effective overparameterization depending on the number of classes, and on quantities related to the data covariance. Our numerical results show excellent agreement with our theoretical findings.
- Subsequently, we provide novel bounds on the error of the MNI classifier for data generated either from the GMM or the MLM and characterize overparameterization conditions under which benign overfitting occurs. A direct outcome of our results is that benign overfitting occurs under these conditions regardless of whether the cross-entropy loss or squared loss is used during training.

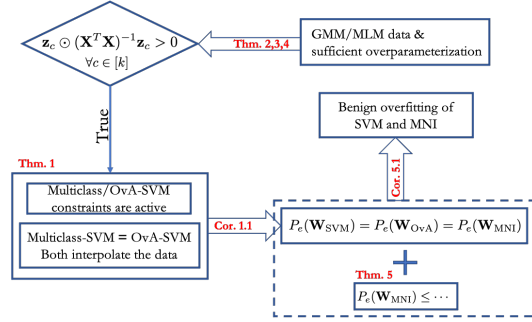

Figure 1: Contributions and organization.

Figure 1 describes our contributions and their implications through a flowchart. *To the best of our knowledge, these are the first results characterizing a) equivalence of loss functions, and b) generalization of interpolating solutions in the multiclass setting.* The multiclass setting poses several challenges over and above the recently studied binary case. When presenting our results in later sections, we discuss in detail how our analysis circumvents these challenges.

## 1.2 Related Work

**Multiclass classification and the impact of training loss functions.** There is a classical body of work on algorithms for multiclass classification, e.g., [WW98, BB99, DB95, CS02, LLW04] and several empirical studies of their comparative performance [RK04, F02, ASS01] (also see [HYS16, GCOZ17, KS18, BEH20, DCO20, HB20, PL20] for recent such studies in the context of deep nets). Many of these (e.g. [RK04, HB20, BEH20]) have found that least-squares minimization yields competitive test classification performance to cross-entropy minimization. *Our proof of equivalence of the SVM and MNI solutions under sufficient overparameterization provides theoretical support for this line of work.* This is a consequence of the implicit bias of gradient descent run on the CE and squared losses leading to the multiclass SVM [SHN<sup>+</sup>18, JT19] and MNI [EHN96] respectively. Numerous classical works investigated consistency [Zha04, LLW04, TB07, PGS13, PS16] and finite-sample behavior, e.g., [KP02, CKMY16, LDBK15, Mau16, LDZK19] of multiclass classification algorithms in the underparameterized regime. In contrast, our focus is on the highly overparameterized regime, where the typical uniform convergence techniques cannot apply.

**Binary classification error analyses in overparameterized regime.** The recent wave of analyses of the minimum- $\ell_2$ -norm interpolator (MNI) in high-dimensional linear regression (an incomplete list is [BLLT20, BHX20, HMRT19, MVSS20, KLS20]) prompted researchers to consider to what extent the phenomena of benign overfitting and double descent [BHMM19, GJS<sup>+</sup>20] can be proven to occur in classification tasks. Even the binary classification setting turns out to be significantly more challenging to study owing to the discontinuity of the 0 – 1 test loss function. Sharp asymptotic formulas for the generalization error of binary classification algorithms in the linear high-dimensional regime have been derived in several recent works [Hua17, SC19, MLC19, SAH19, TPT20, TPT21, DKT21, MRSY19, KA21, LS20, SAH20, AKLZ20, Lol20, DL20]. These formulas are solutions to complicated nonlinear systems of equations that typically do not admit closed-form expressions. A separate line of work provides non-asymptotic error bounds for both the MNI classifier and the SVM classifier [CL21, MNS<sup>+</sup>20, WT21, CGB21]; in particular, [MNS<sup>+</sup>20] analyzed the SVM

in a Gaussian covariates model by explicitly connecting its solution to the MNI solution. Subsequently, [WT21] also took this route to analyze the SVM and MNI in mixture models, which turn out to be more technically involved. Even more recently, [CGB21] provided extensions of the result by [WT21] to sub-Gaussian mixtures. While these non-asymptotic analyses are only sharp in their dependences on  $n$  and  $p$ , they provide closed-form generalization expressions in terms of easily interpretable summary statistics. Interestingly, these results imply good generalization of the SVM beyond the regime in which margin-based bounds are predictive. Specifically, [MNS<sup>+</sup>20] identifies a separating regime for Gaussian covariates in which corresponding regression tasks would not generalize. In the Gaussian mixture model, margin-based bounds [SFBL98, BM03] (as well as corresponding recently derived mistake bounds on interpolating classifiers [LR21]) would require the intrinsic signal-to-noise-ratio (SNR) to scale at least as  $\omega(p^{1/2})$  for good generalization; however, the analyses of [CL21, WT21, CGB21] show that good generalization is possible for significantly lower SNR scaling as  $\omega(p^{1/4})$ . The above error analyses are specialized to the binary case, where closed-form error expressions are easy to derive [MNS<sup>+</sup>20]. The only related work applicable to multiclass settings is [TOS20], which also highlights the numerous challenges of obtaining a sharp error analysis in multiclass settings. Specifically, [TOS20] derived sharp generalization formulas for multiclass least-squares in underparameterized settings; extensions to the overparameterized regime and other losses beyond least-squares remained wide open. Finally, [KT21] recently derived sharp phase-transition thresholds for the feasibility of OvA-SVM on multiclass Gaussian mixture data in the linear high-dimensional regime. However, their result does not cover the more challenging multiclass-SVM that we investigate here.

**Other SVM analyses.** The number of support vectors in *binary* SVM has been characterized in low-dimensional separable and non-separable settings [DOS99, BG01, MO05] and scenarios have been identified in which there is vanishing fraction of support vectors, as this implies good generalization<sup>1</sup> via PAC-Bayes sample compression bounds [Vap13]. In the highly overparameterized regime that we consider, perhaps surprisingly, the opposite behavior occurs: *all training points become support vectors with high probability* [DOS99, BG01, MO05, MNS<sup>+</sup>20, HMX21]. In particular, [HMX21] provided sharp non-asymptotic sufficient conditions for this phenomenon for both isotropic and anisotropic settings. The techniques in [MNS<sup>+</sup>20, HMX21] are highly specialized to the binary SVM and its dual, where a simple complementary slackness condition directly implies the property of interpolation. In contrast, the complementary slackness condition for the case of multiclass SVM *does not* directly imply interpolation; in fact, the operational meaning of “all training points becoming support vectors” is unclear in the multiclass SVM. *Our proof of deterministic equivalence goes beyond the complementary slackness condition and uncovers a surprising symmetric structure<sup>2</sup> by showing equivalence of multiclass SVM to a symmetric OvA classifier.*

**Notation** For a vector  $\mathbf{v} \in \mathbb{R}^p$ , let  $\|\mathbf{v}\|_2 = \sqrt{\sum_{i=1}^p v_i^2}$ ,  $\|\mathbf{v}\|_1 = \sum_{i=1}^p |v_i|$ ,  $\|\mathbf{v}\|_\infty = \max_i \{|v_i|\}$ .  $\mathbf{v} > \mathbf{0}$  is interpreted elementwise.  $\mathbf{1}$  /  $\mathbf{0}$  denote the all-ones / all-zeros vectors and  $\mathbf{e}_i$  denotes the  $i$ -th standard basis vector. For a matrix  $\mathbf{M}$ ,  $\|\mathbf{M}\|_2$  denotes its  $2 \rightarrow 2$  operator norm and  $\|\mathbf{M}\|_F$  denotes the Frobenius norm.  $\odot$  denotes the Hadamard product.  $[n]$  denotes the set  $\{1, 2, \dots, n\}$ . We also use standard “Big O” notations  $\Theta(\cdot)$ ,  $\omega(\cdot)$ , e.g., see [CLRS09, Chapter 3]. Finally, we write  $\mathcal{N}(\boldsymbol{\mu}, \boldsymbol{\Sigma})$  for the (multivariate) Gaussian distribution of mean  $\boldsymbol{\mu}$  and covariance matrix  $\boldsymbol{\Sigma}$ , and,  $Q(x) = \mathbb{P}(Z > x)$ ,  $Z \sim \mathcal{N}(0, 1)$  for the Q-function of a standard normal. Throughout, constants refer to numbers that do not depend on the problem dimensions  $n$  or  $p$ .

## 2 Problem setting

We consider the multiclass classification problem with  $k$  classes. Let  $\mathbf{x} \in \mathbb{R}^p$  denote the feature vector and  $y \in [k]$  represent the class label associated with one of the  $k$  classes. We assume that the training data has  $n$  feature/label pairs  $\{\mathbf{x}_i, y_i\}_{i=1}^n$ . We focus on the overparameterized regime, i.e.,  $p > Cn$ , and will frequently consider  $p \gg n$ . For convenience, we express the labels using the one-hot coding vector  $\mathbf{y}_i \in \mathbb{R}^k$ , where only the  $y_i$ -th entry of  $\mathbf{y}_i$  is 1 and all other entries are zero,

<sup>1</sup>In this context, the fact that [MNS<sup>+</sup>20, WT21] provide good generalization bounds in the regime where support vectors proliferate is particularly surprising. In conventional wisdom, a proliferation of support vectors was associated with overfitting but this turns out to not be the case here.

<sup>2</sup>This symmetric structure is somewhat reminiscent of the recently observed neural collapse phenomenon in deep neural networks [PHD20], although the details of the obtained solutions are quite different.

i.e.,  $\mathbf{y}_i = e_{y_i}$ . With this notation, the feature and label matrices are given in compact form as follows:  $\mathbf{X} = [\mathbf{x}_1 \ \mathbf{x}_2 \ \cdots \ \mathbf{x}_n] \in \mathbb{R}^{p \times n}$  and  $\mathbf{Y} = [\mathbf{y}_1 \ \mathbf{y}_2 \ \cdots \ \mathbf{y}_n] = [\mathbf{v}_1 \ \mathbf{v}_2 \ \cdots \ \mathbf{v}_k]^T \in \mathbb{R}^{k \times n}$ , where we have defined  $\mathbf{v}_c \in \mathbb{R}^n$ ,  $c \in [k]$  to denote the  $c$ -th row of the matrix  $\mathbf{Y}$ .

## 2.1 Data models

We assume that the data pairs  $\{\mathbf{x}_i, y_i\}_{i=1}^n$  are generated IID. We will consider two models for the distribution of  $(\mathbf{x}, y)$ . For both models, we define the mean vectors  $\{\boldsymbol{\mu}_j\}_{j=1}^k \in \mathbb{R}^p$ , and the mean matrix is given by  $\mathbf{M} := [\boldsymbol{\mu}_1 \ \boldsymbol{\mu}_2 \ \cdots \ \boldsymbol{\mu}_k] \in \mathbb{R}^{p \times k}$ .

**Gaussian Mixture Model (GMM).** In this model, the mean vector  $\boldsymbol{\mu}_i$  represents the conditional mean vector for the  $i$ -th class. Specifically, each observation  $(\mathbf{x}_i, y_i)$  belongs to class  $c \in [k]$  with probability  $\pi_c$  and conditional on the label  $y_i$ ,  $\mathbf{x}_i$  follows a multivariate Gaussian distribution. In summary, we have

$$\mathbb{P}(y = c) = \pi_c \text{ and } \mathbf{x} = \boldsymbol{\mu}_y + \mathbf{q}, \mathbf{q} \sim \mathcal{N}(\mathbf{0}, \boldsymbol{\Sigma}). \quad (1)$$

In this work, we focus on the isotropic case  $\boldsymbol{\Sigma} = \mathbf{I}_p$ . Our analysis can likely be extended to more general settings, but we leave this to future work.

**Multinomial Logit Model (MLM).** In this model, the feature vector  $\mathbf{x} \in \mathbb{R}^p$  follows  $\mathcal{N}(\mathbf{0}, \boldsymbol{\Sigma})$ , and the conditional density of the class label  $y$  is given by the soft-max function. Specifically, we have

$$\mathbf{x} \sim \mathcal{N}(\mathbf{0}, \boldsymbol{\Sigma}) \text{ and } \mathbb{P}(y = c | \mathbf{x}) = \exp(\boldsymbol{\mu}_c^T \mathbf{x}) / \sum_{j \in [k]} \exp(\boldsymbol{\mu}_j^T \mathbf{x}). \quad (2)$$

For this model, we analyze both the isotropic and anisotropic cases.

## 2.2 Data separability

We consider linear classifiers parameterized by  $\mathbf{W} = [\mathbf{w}_1 \ \mathbf{w}_2 \ \cdots \ \mathbf{w}_k]^T \in \mathbb{R}^{k \times p}$ . Given input feature vector  $\mathbf{x}$ , the classifier is a function that maps  $\mathbf{x}$  into an output of  $k$  via<sup>3</sup>  $\mathbf{x} \mapsto \mathbf{W}\mathbf{x} \in \mathbb{R}^k$ . We will operate in a regime where the training data are linearly separable. In multiclass settings, there exist multiple notions of separability. Here, we focus on (i) multiclass/ $k$ -class separability (ii) one-vs-all (OvA) separability, and, recall their definitions below.

**Definition 1** (multiclass and OvA separability). *The dataset  $\{\mathbf{x}_i, y_i\}_{i \in [n]}$  is multiclass linearly separable when  $\exists \mathbf{W} = [\mathbf{w}_1, \mathbf{w}_2, \dots, \mathbf{w}_k]^T \in \mathbb{R}^{k \times p} : (\mathbf{w}_{y_i} - \mathbf{w}_c)^T \mathbf{x}_i \geq 1, \forall c \neq y_i, c \in [k]$ , and  $\forall i \in [n]$ . The dataset is one-vs-all (OvA) separable when  $\exists \mathbf{W} = [\mathbf{w}_1, \mathbf{w}_2, \dots, \mathbf{w}_k]^T \in \mathbb{R}^{k \times p} : \mathbf{w}_c^T \mathbf{x}_i \geq 1$  if  $y_i = c$  and  $\mathbf{w}_c^T \mathbf{x}_i \leq -1$  if  $y_i \neq c, \forall c \in [k]$ , and  $\forall i \in [n]$ .*

In the overparameterized regime  $p > n$  with Gaussian data, we have  $\text{rank}(\mathbf{X}) = n$  almost surely, which implies OvA separability. It turns out that OvA separability implies multiclass separability, but not vice versa (see [BM94] for a counterexample).

## 2.3 Classification error

Consider a linear classifier  $\widehat{\mathbf{W}}$  and a fresh sample  $(\mathbf{x}, y)$  generated following the same distribution as the training data. As is standard, we predict  $\hat{y}$  by a “winner takes it all strategy”, i.e.,  $\hat{y} = \arg \max_{j \in [k]} \widehat{\mathbf{w}}_j^T \mathbf{x}$ . Then, the classification error conditioned on the true label being  $c$ , which we refer to as the *class-wise classification error*, is defined as  $\mathbb{P}_{e|c} := \mathbb{P}(\hat{y} \neq y | y = c) = \mathbb{P}(\widehat{\mathbf{w}}_c^T \mathbf{x} \leq \max_{j \neq c} \widehat{\mathbf{w}}_j^T \mathbf{x})$ . In turn, the *total classification error* is defined as  $\mathbb{P}_e := \mathbb{P}(\hat{y} \neq y) = \mathbb{P}(\arg \max_{j \in [k]} \widehat{\mathbf{w}}_j^T \mathbf{x} \neq y) = \mathbb{P}(\widehat{\mathbf{w}}_y^T \mathbf{x} \leq \max_{j \neq y} \widehat{\mathbf{w}}_j^T \mathbf{x})$ .

## 2.4 Classification algorithms

Next, we review several different training strategies for which we characterize the total/class-wise classification error in this paper.

<sup>3</sup>For simplicity, we ignore the bias term throughout.

**Multiclass SVM.** Consider training  $\mathbf{W}$  by minimizing the popular cross-entropy (CE) loss  $\mathcal{L}(\mathbf{W}) := -\log(e^{\mathbf{w}_{y_i}^T \mathbf{x}_i} / \sum_{c \in [k]} e^{\mathbf{w}_c^T \mathbf{x}_i})$  with the gradient descent algorithm (with constant step size  $\eta$ ). In the separable regime that we consider, the CE loss  $\mathcal{L}(\mathbf{W})$  can be driven to zero. Moreover, [SHN<sup>+</sup>18, Thm. 7] showed that the normalized iterates  $\{\mathbf{W}^t\}_{t \geq 1}$  converge as  $\lim_{t \rightarrow \infty} \|\mathbf{W}^t\| / \log t - \|\mathbf{W}_{\text{SVM}}\|_F = 0$ ,<sup>4</sup> where  $\mathbf{W}_{\text{SVM}}$  is the solution of the *multiclass SVM* [WW98] given by

$$\mathbf{W}_{\text{SVM}} := \arg \min_{\mathbf{W}} \|\mathbf{W}\|_F \quad \text{sub. to } (\mathbf{w}_{y_i} - \mathbf{w}_c)^T \mathbf{x}_i \geq 1, \forall i \in [n], c \in [k] \text{ s.t. } c \neq y_i. \quad (3)$$

**One-vs-all SVM.** In contrast to Eqn. (3) that optimizes the hyperplanes  $\{\mathbf{w}_c\}_{c \in [k]}$  jointly, the one-vs-all (OvA)-SVM classifier solves  $k$  separable optimization problems maximizing the margin of each class with respect to all the rest. Concretely, the OvA-SVM solves for all  $c \in [k]$ :

$$\mathbf{w}_{\text{OvA},c} := \arg \min_{\mathbf{w}} \|\mathbf{w}\|_2 \quad \text{sub. to } \mathbf{w}^T \mathbf{x}_i \geq 1, \text{ if } y_i = c; \quad \mathbf{w}^T \mathbf{x}_i \leq -1 \text{ if } y_i \neq c, \forall i \in [n]. \quad (4)$$

In general, the solutions to Equations (3) and (4) are different. While the OvA-SVM does not have an obvious connection to any training loss function, its relevance will become clear in Section 3. Perhaps surprisingly, we will prove that in the highly overparameterized regime the multiclass SVM solution is identical to a slight variant of (4).

**Min-norm interpolating (MNI) classifier.** An alternative to the CE loss is the square loss  $\mathcal{L}(\mathbf{W}) := \frac{1}{2n} \|\mathbf{Y} - \mathbf{W}\mathbf{X}\|_2^2 = \frac{1}{2n} \sum_{i=1}^n \|\mathbf{W}\mathbf{x}_i - \mathbf{y}_i\|_2^2$ . While the square-loss appears to be more tailored to regression, it in fact has competitive classification accuracy to the CE loss in practice [Rif02, HB20, PL20]. Since  $\text{rank}(\mathbf{X}) = n$  almost surely, the data can be linearly interpolated, i.e. the square-loss can be made zero. Then, it is well-known [EHN96] that gradient descent with sufficiently small step size and appropriate initialization converges to the minimum-norm -interpolating (MNI) solution:

$$\mathbf{W}_{\text{MNI}} := \arg \min_{\mathbf{W}} \|\mathbf{W}\|_F, \quad \text{sub. to } \mathbf{X}^T \mathbf{w}_c = \mathbf{v}_c, \forall c \in [k]. \quad (5)$$

Since  $\mathbf{X}^T \mathbf{X}$  is invertible, the solution above is given in closed form as  $\mathbf{W}_{\text{MNI}}^T = \mathbf{X}(\mathbf{X}^T \mathbf{X})^{-1} \mathbf{Y}^T$ . From here on, we refer to (5) as the MNI classifier.

### 3 Proliferation of support vectors

In this section, we show equivalence of the solutions of the three classifiers defined above.

#### 3.1 A key deterministic condition

We first establish a key deterministic property of SVM that holds for *generic* multiclass datasets  $(\mathbf{X}, \mathbf{Y})$  (not necessarily generated by either the GMM or MLM), as long as  $\text{rank}(\mathbf{X}) = n$ . Specifically, Theorem 1 below derives a sufficient condition (cf. (8)) under which the multiclass SVM solution has a surprisingly simple structure. First, the constraints are *all* active at the optima (cf. (9)). Second, and perhaps more interestingly, the equality of the constraints is satisfied in a very symmetric way such that (cf. (10)) for all  $i \in [n], c \in [k]$ , we have

$$\hat{\mathbf{w}}_c^T \mathbf{x}_i = z_{ci} := \begin{cases} (k-1)/k & , c = y_i \\ -1/k & , c \neq y_i \end{cases}. \quad (6)$$

**Theorem 1.** *For a multiclass separable dataset with feature matrix  $\mathbf{X} = [\mathbf{x}_1, \mathbf{x}_2, \dots, \mathbf{x}_n] \in \mathbb{R}^{p \times n}$  and label matrix  $\mathbf{Y} = [\mathbf{v}_1, \mathbf{v}_2, \dots, \mathbf{v}_k]^T \in \mathbb{R}^{k \times n}$ , let  $\mathbf{W}_{\text{SVM}} = [\hat{\mathbf{w}}_1, \hat{\mathbf{w}}_2, \dots, \hat{\mathbf{w}}_k]^T$  be the multiclass SVM solution in (3). For each class  $c \in [k]$  define vectors  $\mathbf{z}_c \in \mathbb{R}^n$  such that*

$$\mathbf{z}_c = \mathbf{v}_c - (1/k)\mathbf{1}_n, \quad c \in [k]. \quad (7)$$

*Assume that the Gram matrix  $\mathbf{X}^T \mathbf{X}$  is invertible and that the following condition holds*

$$\mathbf{z}_c \odot (\mathbf{X}^T \mathbf{X})^{-1} \mathbf{z}_c > \mathbf{0}, \quad \forall c \in [k]. \quad (8)$$

<sup>4</sup>Note that the scaling factor  $\log t$  here does *not* depend on the class label; hence, in the limit of GD iterations, the solution  $\mathbf{W}^t$  decides the same label as multiclass SVM for any test sample.

Then, the SVM solution  $\mathbf{W}_{\text{SVM}}$  is such that all the constraints in (3) are active. That is,

$$(\hat{\mathbf{w}}_{y_i} - \hat{\mathbf{w}}_c)^T \mathbf{x}_i = 1, \forall c \neq y_i, c \in [k], \text{ and } \forall i \in [n]. \quad (9)$$

Moreover, it holds that

$$\mathbf{X}^T \hat{\mathbf{w}}_c = \mathbf{z}_c, \forall c \in [k]. \quad (10)$$

For  $k = 2$  classes, it can be checked that Eqn. (8) reduces to the condition in Eqn.(22) of [MNS<sup>+</sup>20] for the binary SVM. Compared to the binary setting, the conclusion for multiclass is richer: provided that Eqn. (8) holds, not only do we show that all data points are support vectors, but also, that they satisfy a set of symmetric OvA-type constraints. The proof of Eqn. (10) is particularly subtle and involved: unlike in the binary case, it does *not* follow directly from a complementary slackness condition on the dual of the multiclass SVM. We provide a short proof sketch in Section 3.1.1 and defer details to the supplementary material (SM).

We make the following additional remarks on the interpretation of Eqn. (10). First, our proof shows a somewhat stronger conclusion: when inequality (8) holds, the multiclass SVM solutions  $\hat{\mathbf{w}}_c, c \in [k]$  are same as the solutions to the following *symmetric OvA-type classifier* (cf. Eqn. (4)):

$$\min_{\mathbf{w}_c} \frac{1}{2} \|\mathbf{w}_c\|_2^2 \quad \text{sub. to } \mathbf{x}_i^T \mathbf{w}_c \begin{cases} \geq (k-1)/k & , y_i = c, \\ \leq -1/k & , y_i \neq c, \end{cases} \quad \forall i \in [n], \quad (11)$$

for all  $c \in [k]$ . The OvA-type classifier above can be interpreted as a binary cost-sensitive SVM classifier [IMSV19] that enforces the margin corresponding to all other classes to be  $(k-1)$  times smaller compared to the margin for class  $c$ .

The second remark regarding (10) is crucial for the rest of this paper. Precisely, (10) shows that when (8) holds, then the multiclass SVM solution  $\mathbf{W}_{\text{SVM}}$  has the same classification error as that of the minimum-norm interpolating solution. This conclusion, stated as a corollary below, drives our classification error analysis in Section 4.

**Corollary 1** (SVM=MNI). *Under the same assumptions as in Theorem 1, and provided that the inequality in Eqn. (8) holds, it holds that  $\mathbb{P}_{e|c}(\mathbf{W}_{\text{SVM}}) = \mathbb{P}_{e|c}(\mathbf{W}_{\text{MNI}})$  for all  $c \in [k]$ . Thus, the total classification errors of both solutions are equal:  $\mathbb{P}_e(\mathbf{W}_{\text{SVM}}) = \mathbb{P}_e(\mathbf{W}_{\text{MNI}})$ .*

*Proof sketch.* First, it follows from Eqn. (10) that  $\hat{\mathbf{w}}_c, c \in [k]$  coincides with the unique solution of a MNI classifier on shifted labels, given by  $\tilde{\mathbf{w}}_c = \tilde{\mathbf{w}}_c := \mathbf{X}(\mathbf{X}^T \mathbf{X})^{-1} \mathbf{z}_c$ . Second, using the affine relation between  $\mathbf{z}_c$  and  $\mathbf{v}_c$  in Eqn. (7), we get  $\mathbb{P}_{e|c}(\mathbf{W}_{\text{MNI}}) = \mathbb{P}_{e|c}(\tilde{\mathbf{W}}_{\text{MNI}})$ , where we denote  $\tilde{\mathbf{W}}_{\text{MNI}} = [\tilde{\mathbf{w}}_1, \dots, \tilde{\mathbf{w}}_k]$ . This completes the proof of the corollary. More details given in the SM.  $\square$

### 3.1.1 Proof sketch of Theorem 1

To prove Theorem 1, we constructed a new parameterization of the dual of the multiclass SVM (given in Eqn. (14)). Letting dual variables  $\{\lambda_{c,i}\}$  for every  $i \in [n], c \in [k] : c \neq y_i$  corresponding to the constraints on the primal form in (3), the standard form of the dual of multiclass SVM is written as

$$\max_{\lambda_{c,i} \geq 0} \sum_{i \in [n]} \left( \sum_{c \neq y_i} \lambda_{c,i} \right) - \frac{1}{2} \sum_{c \in [k]} \left\| \sum_{i \in [n]: y_i = c} \left( \sum_{c' \neq y_i} \lambda_{c',i} \right) \mathbf{x}_i - \sum_{i \in [n]: y_i \neq c} \lambda_{c,i} \mathbf{x}_i \right\|_2^2. \quad (12)$$

Let  $\hat{\lambda}_{c,i}$  be the maximizers in Eqn. (12). By complementary slackness, we have

$$\hat{\lambda}_{c,i} > 0 \implies (\hat{\mathbf{w}}_{y_i} - \hat{\mathbf{w}}_c)^T \mathbf{x}_i = 1. \quad (13)$$

Thus, to prove Eqn. (9), it will suffice showing that  $\hat{\lambda}_{c,i} > 0, \forall i \in [n], c \in [k] : c \neq y_i$  provided that Eqn. (8) holds. The challenge is that it is hard to work directly with (12) because the variables  $\lambda_{c,i}$  are coupled within the objective. Our key idea is to re-parameterize the dual objective in terms of new variables  $\beta_{c,i}$  and of coefficients involving the vectors  $\mathbf{z}_c$  we introduced in Eqn. (7). Deferring the detailed derivations to the SM, we can show that (12) is equivalent to the following program:

$$\begin{aligned} & \max_{\beta_c \in \mathbb{R}^n, c \in [k]} \sum_{c \in [k]} \beta_c^T \mathbf{z}_c - \frac{1}{2} \|\mathbf{X} \beta_c\|_2^2 \\ & \text{sub. to } \beta_{y_i,i} = - \sum_{c \neq y_i} \beta_{c,i}, \forall i \in [n] \quad \text{and} \quad \beta_c \odot \mathbf{z}_c \geq \mathbf{0}, \forall c \in [k], \end{aligned} \quad (14)$$

where, for each  $c \in [k]$  we let  $\beta_c = [\beta_{c,1}, \beta_{c,2}, \dots, \beta_{c,n}] \in \mathbb{R}^n$ . Moreover, the new dual variables are related to the original ones in that

$$z_{c,i}\beta_{c,i} > 0 \iff \lambda_{c,i} > 0, \quad \text{for all } c \in [k] \text{ and } i \in [n] : y_i \neq c. \quad (15)$$

The next step is to consider the *unconstrained* maximizer in (14), that is  $\hat{\beta}_c = (\mathbf{X}^T \mathbf{X})^{-1} \mathbf{z}_c$ ,  $\forall c \in [k]$ , and show that  $\hat{\beta}_c, c \in [k]$  is feasible in (14). Skipping the detailed argument here, by doing so, we prove that  $\hat{\beta}_c, c \in [k]$  is in fact the unique optimal solution of (14). But now, realizing that Eqn. (8) is equivalent to  $\mathbf{z}_c \odot \hat{\beta}_c > 0$ , we have found that  $\hat{\beta}_c, c \in [k]$  further satisfies the  $n$  *strict* inequality constraints in (14). Thus, from Eqn. (15), the original dual variables  $\{\lambda_{c,i}\}$  are also all strictly positive, which completes the proof of the first part of the theorem (Eqn. (9)).

Next, we outline the proof of Eqn. (10). We consider the OvA-classifier in (11). The proof has two steps. First, using similar arguments to what was done above, we show that when Eqn. (8) holds, then all the inequality constraints in (11) are active at the optimal. That is, the minimizers  $\mathbf{w}_{\text{sym-OvA},c}$  of (11) satisfy Eqn. (10). Second, to prove that Eqn. (10) is satisfied by the minimizers  $\hat{\mathbf{w}}_c$  of the multiclass SVM in Eqn. (3), we need to show that  $\mathbf{w}_{\text{sym-OvA},c} = \hat{\mathbf{w}}_c$  for all  $c \in [k]$ . We do this by showing that, under Eqn. (8), the duals of (3) and (11) are equivalent. By strong duality, the optimal costs of the primal problems are also the same. Then, because the objective is the same for the two primals and because  $\mathbf{w}_c^*$  is feasible and (3) is strongly convex, we can conclude with the desired.

### 3.2 Connection to effective overparameterization

Theorem 1 establishes a *deterministic* condition that applies to *any* multiclass separable dataset as long as the data matrix  $\mathbf{X}$  is full-rank. In this subsection, we show that the inequality (8) occurs with high-probability under both the GMM and MLM models for data, with sufficient overparameterization.

#### 3.2.1 Gaussian mixture model

We focus on an equal-energy, equal-prior setting for ease of exposition. Our proofs extend rather naturally to more general settings, but the results are more complicated to state and offer no new insights for our purpose.

**Assumption 1** (Equal energy/prior). *The mean vectors have equal energy and the priors are equal, i.e. we have  $\|\boldsymbol{\mu}\|_2 := \|\boldsymbol{\mu}_c\|_2$  and  $\pi_c = \pi = 1/k$ , for all  $c \in [k]$ .*

**Theorem 2.** *Assume that the training set follows a multiclass GMM with  $\boldsymbol{\Sigma} = \mathbf{I}_p$  and Assumption 1, and that the number of training samples  $n$  is large enough. There exist constants  $c_1, c_2, c_3 > 1$  and  $C_1, C_2 > 1$  such that inequality (8) holds with probability at least  $1 - \frac{c_1}{n} - c_2 k e^{-\frac{n}{c_3 k^2}}$ , provided that*

$$p > C_1 k^3 n \log(kn) + n - 1 \quad \text{and} \quad p > C_2 k^{1.5} n^{1.5} \|\boldsymbol{\mu}\|_2. \quad (16)$$

Our theorem establishes a set of two conditions under which inequality (8) and the conclusions of Theorem 1 hold, i.e.  $\mathbf{W}_{\text{SVM}} = \mathbf{W}_{\text{MNI}}$ . The first condition requires sufficient overparameterization  $p = \Omega(k^3 n \log(kn))$ , while the second one requires that the signal strength is not too large. Intuitively, we can understand these conditions as follows. Note that inequality (8) is satisfied provided that the inverse Gram matrix  $(\mathbf{X}^T \mathbf{X})^{-1}$  is “close” to identity, or any other positive-definite diagonal matrix. (This is the proof strategy that is also followed in [MNS<sup>+</sup>20] for the case of Gaussian features; here, we show this for the more difficult mixture-of-Gaussians case.) Recall from Eqn. (1) that  $\mathbf{X} = \mathbf{M}\mathbf{Y} + \mathbf{Q} = \sum_{j=1}^k \boldsymbol{\mu}_j \mathbf{v}_j^T + \mathbf{Q}$  where  $\mathbf{Q}$  is a  $p \times n$  standard Gaussian matrix. Our theorem’s first condition is sufficient for  $(\mathbf{Q}^T \mathbf{Q})^{-1}$  to have the desired property; the major technical challenge is that  $(\mathbf{X}^T \mathbf{X})^{-1}$  involves additional terms that intricately depend on the label matrix  $\mathbf{Y}$  itself. Our key technical contribution is showing that these extra terms do *not* drastically change the desired behavior, provided that the norms of the mean vectors are well controlled. At a high-level we accomplish this with a recursive argument as follows. Denote  $\mathbf{X}_0 = \mathbf{Q}$  and  $\mathbf{X}_i = \sum_{j=1}^i \boldsymbol{\mu}_j \mathbf{v}_j^T + \mathbf{Q}$  for  $i \in [k]$ . Then, at each stage  $i$  of the recursion, we show how to bound quadratic forms involving  $(\mathbf{X}_i^T \mathbf{X}_i)^{-1}$  using bounds established previously at stage  $i - 1$  on quadratic forms involving  $(\mathbf{X}_{i-1}^T \mathbf{X}_{i-1})^{-1}$ . A critical property for the success of our proof strategy is the observation that the rows of  $\mathbf{Y}$  are always orthogonal, that is,  $\mathbf{v}_i^T \mathbf{v}_j = 0$ , for  $i \neq j$ . The complete proof of the theorem is given in the SM.

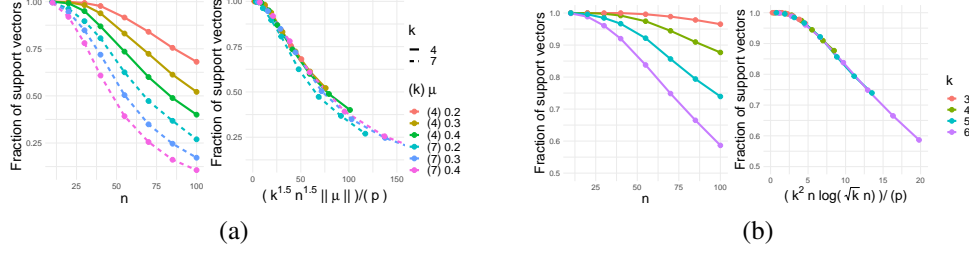

Figure 2: Fraction of support vectors satisfying Eqn. (10). (a) GMM:  $k = 4$  and  $7$ , (b) MLM:  $k = 3, 4, 5, 6$ . In (a), "(4) 0.2" means 4 classes and  $\|\mu\|_2/\sqrt{p} = 0.2$ . The curves nearly overlap when plotted versus  $k^{1.5}n^{1.5}\|\mu\|_2/p$  as predicted by the second condition in Eqn. (16) of Theorem 2. In (b), the curves overlap when plotted versus  $k^2n \log(\sqrt{k}n)/p$  as predicted by Thm. 4.

Next, we present numerical results that confirm our theoretical statement. We also discuss the tightness of the two sufficient conditions in Eqn. (16). Throughout the paper, in all our figures, we show averages over 100 Monte-Carlo realizations. In Fig. 2(a), we plot the *fraction of training points in the multiclass SVM satisfying Eqn. (10)* as a function of training size  $n$  for  $k = 4$  and  $k = 7$  classes (please see SM for other experiment details and more results). To verify the second condition in Eqn. (16), Fig. 2(a) also plots the same set of curves over a re-scaled axis  $k^{1.5}n^{1.5}\|\mu\|_2/p$ . The 6 curves corresponding to different settings nearly overlap in this new scaling, which suggests the correct order of the corresponding condition. We conjecture that our second condition is tight up to an extra  $\sqrt{n}$  factor which we believe is an artifact of the analysis. We also believe that the  $k^3$  factor in the first condition can be relaxed slightly to  $k^2$  (as is done for the MLM case; see Fig. 2(b)).

### 3.2.2 Multinomial logistic model

We now consider the MLM data and the anisotropic setting. The eigendecomposition of the covariance matrix is given by  $\Sigma = \sum_{i=1}^p \lambda_i \mathbf{u}_i \mathbf{u}_i^T$ , where  $\lambda = [\lambda_1, \dots, \lambda_p]$ . Following [HMX21], we also define the effective dimensions  $d_2 := \|\lambda\|_1^2 / \|\lambda\|_2^2$  and  $d_\infty := \|\lambda\|_1 / \|\lambda\|_\infty$ . The following result contains sufficient conditions for the SVM and MNI solutions to coincide.

**Theorem 3.** *Assume  $n$  training samples following the MLM defined in (2). There exist constants  $c$  and  $C_1, C_2 > 1$  such that inequality (8) holds with probability at least  $(1 - \frac{c}{n})$  provided that  $d_\infty > C_1 k^2 n \log(kn)$  and  $d_2 > C_2 (\log(kn) + n)$ . In fact, the only conditions we require on the generated labels is conditional independence.*

The sufficient conditions in Theorem 3 require that the spectral structure in the covariance matrix  $\Sigma$  has sufficiently slowly decaying eigenvalues (corresponding to sufficiently large  $d_2$ ), and that it is not too "spiky" (corresponding to sufficiently large  $d_\infty$ ). For the special case of  $k = 2$  classes, our conditions reduce to those in [HMX21] for binary classification; in fact under the MLM model we can leverage a more sophisticated deterministic equivalence to Eqn. (8) provided in that work. The dominant dependence on  $k$ , given by  $k^2$ , is a byproduct of the "unequal" margin in (6). Fig. 2(b) empirically verifies the tightness of this factor. For the isotropic case  $\Sigma = \mathbf{I}_p$ , we can prove a slightly sharper result in logarithmic factors, which we state next.

**Theorem 4.** *Assume  $n$  samples from the MLM with  $\Sigma = \mathbf{I}_p$ . There exist a constant  $c > 1$  such that inequality (8) holds with probability at least  $(1 - \frac{c}{n})$  provided that  $p > 10k^2 n \log(\sqrt{k}n) + n - 1$ .*

Our numerical results in Fig. 2(b) suggest that this sufficient condition is order-wise tight. Specifically, in Fig. 2, we fixed  $p = 1000$ , varied  $n$  from 10 to 100 and the numbers of classes from  $k = 3$  to  $k = 6$ . We chose orthogonal mean vectors for each class with equal energy  $\|\mu\|_2^2 = p$ . Fig. 2(b) shows the fraction of training points in the multiclass SVM satisfying Eqn. (10) as a function of  $n$ . Clearly, smaller  $k$  results in higher proportion of support vectors for the same number of measurements  $n$ . To verify the condition in Theorem 4, Fig. 2(b) plots the same curves over a re-scaled axis  $k^2 n \log(\sqrt{k}n)/p$  (as suggested by Thm.4). These curves nearly overlap.

## 4 Generalization bounds and benign overfitting

In this section, we derive non-asymptotic bounds on the error of the MNI classifier, and discuss sufficient conditions for the multiclass SVM to satisfy benign overfitting. We focus on the case of GMM data due to space constraints, and discuss corresponding results on MLM data in the SM.

### 4.1 Generalization bounds for the MNI classifier

We present classification error bounds under the additional assumption of orthogonal means for ease of exposition — this can be relaxed with some additional work as described in the SM.

**Assumption 2** (Orthogonal means). *In addition to Assumption 1, assume that the means are orthogonal, that is  $\mu_c^T \mu_j = 0$ , for all  $c \neq j \in [k]$ .*

**Theorem 5.** *Let Assumption 2 and condition in Eqn.(16) hold. Further assume constants  $C_1, C_2, C_3 > 1$  such that  $(1 - \frac{C_1}{\sqrt{n}} - \frac{C_2 n}{p}) \|\mu\|_2 > C_3 \sqrt{k}$ . Then, there exist additional constants*

*$c_1, c_2, c_3$  and  $C_4 > 1$  such that  $\mathbb{P}_{e|c} \leq (k-1) \exp\left(-\frac{\|\mu\|_2^2 \left((1 - \frac{C_1}{\sqrt{n}} - \frac{C_2 n}{p}) \|\mu\|_2 - C_3 \sqrt{k}\right)^2}{C_4 (\|\mu\|_2^2 + \frac{k p}{n})}\right)$  with probability at least  $1 - \frac{c_1}{n} - c_2 k e^{-\frac{n}{c_3 k^2}}$ , for every  $c \in [k]$ . Moreover, the same bound holds for the total classification error  $\mathbb{P}_e$ .*

For large enough and finite  $n$ , our bound reduces to the results in [WT21, CGB21] when  $k = 2$  (with slightly different constant numbers). There are two major challenges in the proof, which is presented in the SM. First, in contrast to the binary case the classification error does *not* simply reduce to bounding correlations between vector means  $\mu_c$  and their estimators  $\hat{w}_c$ . Second, just as in the proof of Theorem 2, technical complications arise from the multiple mean components in  $\mathbf{X}$ . We use a variant of the recursion-based argument described in Section 3.2.1 to obtain our final bound.

### 4.2 Conditions for benign overfitting

In our results thus far, we have studied the classification error of the MNI classifier (Theorem 5), and shown equivalence of the multiclass SVM and MNI solutions (Theorems 1, 2 and Corollary 1). Combining these results, we now provide sufficient conditions under which the classification error of the multiclass SVM solution (also of the MNI) approaches 0 as model size  $p$  increases.

**Corollary 2.** *Let the same assumptions as in Theorem 5 hold. Then, for finite number of classes  $k$  and finite sample size  $n$ , there exist positive constants  $c_i$ 's and  $C_i$ 's  $> 1$ , such that the multiclass SVM classifier  $\mathbf{W}_{\text{SVM}}$  in (3) satisfies the symmetric interpolation constraint in (10) and its total classification error approaches 0 as  $p \rightarrow \infty$  with probability at least  $1 - \frac{c_1}{n} - c_2 k e^{-\frac{n}{c_3 k^2}}$ , provided  $\|\mu\|_2 = \Theta(p^\beta)$  for  $\beta \in (1/4, 1)$ .*

We compare our result with the binary case result in [CL21, WT21, CGB21]. When  $k$  and  $n$  are both finite, condition  $\|\mu\|_2 = \Theta(p^\beta)$  for  $\beta \in (1/4, 1)$  is the same as the binary result. Note that, like in the binary case, Corollary 2 applies beyond the regime in which margin-bounds would be predictive of good generalization, which would require  $\beta \in (1/2, 1)$ .

We now present numerical illustrations validating our results. We set the number of classes  $k = 4$ , fix  $n = 40$ , and vary  $p = 50, \dots, 1200$  to guarantee sufficient overparameterization. We consider the case of orthogonal and equal-norm mean vectors  $\|\mu\|_2 = \mu\sqrt{p}$ , with  $\mu = 0.2, 0.3$  and  $0.4$ . In Fig. 3, we plot the classification error as a function of  $p$  for both MNI estimates (solid lines) and multiclass SVM solutions (dashed lines). As we now expect, the solid and dashed curves almost overlap. Further, as  $p$  increases, we see that the classification error decreases

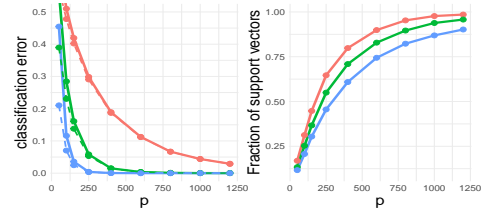

Figure 3: The plot shows the classification error and fraction of support vectors with  $k = 4$ . We can see the classification errors approach 0 and the fractions of support vectors approach 1 as  $p$  gets larger. Different colors correspond to different mean norms.

towards zero. Fig. 3 shows the fraction of support vectors satisfying (10) among all the constraints in (3). We see that the classification error goes to zero very fast when  $\mu$  is large, but the proportion of support vectors increases at a slow rate. In contrast, when  $\mu$  is small, the proportion of support vectors increases fast, but the classification error decreases slowly.

## 5 Conclusion and future work

Our work provides, to the best of our knowledge, the first results characterizing a) equivalence of loss functions, and b) generalization of interpolating solutions in multiclass settings. Like almost all benign overfitting analysis, our techniques are tailored to high-dimensional linear models with Gaussian or independent sub-Gaussian features. Extending these results to kernel machines and other nonlinear settings is of substantial interest. It would also be interesting to explore the potential connections of the symmetric structure shown in Theorem 1 with the recently discovered neural collapse phenomenon on deep nets [PHD20].

## 6 Acknowledgements

This work is partially supported by the NSF under Grant Number CCF-2009030 and by a CRG8 award from KAUST. C. Thrampoulidis would also like to recognize his affiliation with the University of California, Santa Barbara. The authors would like to thank the anonymous reviewers for helpful discussion and suggestions.

## References

- [AKLZ20] Benjamin Aubin, Florent Krzakala, Yue Lu, and Lenka Zdeborová. Generalization error in high-dimensional perceptrons: Approaching Bayes error with convex optimization. In H. Larochelle, M. Ranzato, R. Hadsell, M. F. Balcan, and H. Lin, editors, *Advances in Neural Information Processing Systems*, volume 33, pages 12199–12210. Curran Associates, Inc., 2020.
- [ASS01] Erin L. Allwein, Robert E. Schapire, and Yoram Singer. Reducing multiclass to binary: A unifying approach for margin classifiers. *Journal of Machine Learning Research*, 1:113–141, September 2001.
- [BB99] Erin J Bredensteiner and Kristin P Bennett. Multicategory classification by support vector machines. In *Computational Optimization*, pages 53–79. Springer, 1999.
- [BEH20] Anna Sergeevna Bosman, Andries Engelbrecht, and Mardé Helbig. Visualising basins of attraction for the cross-entropy and the squared error neural network loss functions. *Neurocomputing*, 400:113–136, 2020.
- [Ber09] Dennis S Bernstein. *Matrix mathematics: theory, facts, and formulas*. Princeton university press, 2009.
- [BG01] Arnaud Buhot and Mirta B Gordon. Robust learning and generalization with support vector machines. *Journal of Physics A: Mathematical and General*, 34(21):4377–4388, May 2001.
- [BHMM19] Mikhail Belkin, Daniel Hsu, Siyuan Ma, and Soumik Mandal. Reconciling modern machine-learning practice and the classical bias–variance trade-off. *Proceedings of the National Academy of Sciences*, 116(32):15849–15854, 2019.
- [BHX20] Mikhail Belkin, Daniel Hsu, and Ji Xu. Two models of double descent for weak features. *SIAM Journal on Mathematics of Data Science*, 2(4):1167–1180, 2020.
- [BLLT20] Peter L. Bartlett, Philip M. Long, Gábor Lugosi, and Alexander Tsigler. Benign overfitting in linear regression. *Proceedings of the National Academy of Sciences*, 117(48):30063–30070, 2020.
- [BM94] Kristin P. Bennett and O.L. Mangasarian. Multicategory discrimination via linear programming. *Optimization Methods and Software*, 3(1-3):27–39, 1994.

- [BM03] Peter L. Bartlett and Shahar Mendelson. Rademacher and Gaussian complexities: Risk bounds and structural results. *Journal of Machine Learning Research*, 3:463–482, March 2003.
- [CGB21] Yuan Cao, Quanquan Gu, and Mikhail Belkin. Risk bounds for over-parameterized maximum margin classification on sub-Gaussian mixtures. *arXiv preprint arXiv:2104.13628*, 2021.
- [CKMY16] Corinna Cortes, Vitaly Kuznetsov, Mehryar Mohri, and Scott Yang. Structured prediction theory based on factor graph complexity. In D. Lee, M. Sugiyama, U. Luxburg, I. Guyon, and R. Garnett, editors, *Advances in Neural Information Processing Systems*, volume 29. Curran Associates, Inc., 2016.
- [CL21] Niladri S Chatterji and Philip M Long. Finite-sample analysis of interpolating linear classifiers in the overparameterized regime. *Journal of Machine Learning Research*, 22(129):1–30, 2021.
- [CLRS09] Thomas H. Cormen, Charles E. Leiserson, Ronald L. Rivest, and Clifford Stein. *Introduction to Algorithms, Third Edition*. The MIT Press, 3rd edition, 2009.
- [CS02] Koby Crammer and Yoram Singer. On the algorithmic implementation of multiclass kernel-based vector machines. *Journal of Machine Learning Research*, 2:265–292, March 2002.
- [DB95] Thomas G. Dietterich and Ghulum Bakiri. Solving multiclass learning problems via error-correcting output codes. *Journal of Artificial Intelligence Research*, 2(1):263–286, January 1995.
- [DCO20] Ahmet Demirkaya, Jiasi Chen, and Samet Oymak. Exploring the role of loss functions in multiclass classification. In *2020 54th Annual Conference on Information Sciences and Systems (CISS)*, pages 1–5, 2020.
- [DKT21] Zeyu Deng, Abba Kammoun, and Christos Thrampoulidis. A model of double descent for high-dimensional binary linear classification. *Information and Inference: A Journal of the IMA*, April 2021.
- [DL20] Oussama Dhifallah and Yue M Lu. A precise performance analysis of learning with random features. *arXiv preprint arXiv:2008.11904*, 2020.
- [DOS99] Rainer Dietrich, Manfred Opper, and Haim Sompolinsky. Statistical mechanics of support vector networks. *Physical Review Letters*, 82:2975–2978, Apr 1999.
- [EHN96] Heinz Werner Engl, Martin Hanke, and Andreas Neubauer. *Regularization of inverse problems*, volume 375. Springer Science & Business Media, 1996.
- [F02] Johannes Fürnkranz. Round robin classification. *Journal of Machine Learning Research*, 2:721–747, March 2002.
- [GCOZ17] Krzysztof Gajowniczek, Leszek J. Chmielewski, Arkadiusz Orłowski, and Tomasz Żabkowski. Generalized entropy cost function in neural networks. In Alessandra Lintas, Stefano Rovetta, Paul F.M.J. Verschure, and Alessandro E.P. Villa, editors, *Artificial Neural Networks and Machine Learning – ICANN 2017*, pages 128–136, Cham, 2017. Springer International Publishing.
- [GJS<sup>+</sup>20] Mario Geiger, Arthur Jacot, Stefano Spigler, Franck Gabriel, Levent Sagun, Stéphane d’Ascoli, Giulio Biroli, Clément Hongler, and Matthieu Wyart. Scaling description of generalization with number of parameters in deep learning. *Journal of Statistical Mechanics: Theory and Experiment*, 2020(2):023401, February 2020.
- [HB20] Like Hui and Mikhail Belkin. Evaluation of neural architectures trained with square loss vs cross-entropy in classification tasks. *arXiv preprint arXiv:2006.07322*, 2020.
- [HJ12] Roger A. Horn and Charles R. Johnson. *Matrix Analysis*. Cambridge University Press, USA, 2nd edition, 2012.

- [HMRT19] Trevor Hastie, Andrea Montanari, Saharon Rosset, and Ryan J Tibshirani. Surprises in high-dimensional ridgeless least squares interpolation. *arXiv preprint arXiv:1903.08560*, 2019.
- [HMX21] Daniel Hsu, Vidya Muthukumar, and Ji Xu. On the proliferation of support vectors in high dimensions. In Arindam Banerjee and Kenji Fukumizu, editors, *Proceedings of The 24th International Conference on Artificial Intelligence and Statistics*, volume 130 of *Proceedings of Machine Learning Research*, pages 91–99. PMLR, 13–15 Apr 2021.
- [Hua17] Hanwen Huang. Asymptotic behavior of support vector machine for spiked population model. *Journal of Machine Learning Research*, 18(45):1–21, 2017.
- [HYS16] Le Hou, Chen-Ping Yu, and Dimitris Samaras. Squared earth mover’s distance-based loss for training deep neural networks. *arXiv preprint arXiv:1611.05916*, 2016.
- [IMSV19] Arya Iranmehr, Hamed Masnadi-Shirazi, and Nuno Vasconcelos. Cost-sensitive support vector machines. *Neurocomputing*, 343:50–64, 2019.
- [JT19] Ziwei Ji and Matus Telgarsky. The implicit bias of gradient descent on nonseparable data. In Alina Beygelzimer and Daniel Hsu, editors, *Proceedings of the Thirty-Second Conference on Learning Theory*, volume 99 of *Proceedings of Machine Learning Research*, pages 1772–1798, Phoenix, USA, 25–28 Jun 2019. PMLR.
- [KA21] Abba Kammoun and Mohamed-Slim Alouini. On the precise error analysis of support vector machines. *IEEE Open Journal of Signal Processing*, 2:99–118, 2021.
- [KLS20] Dmitry Kobak, Jonathan Lomond, and Benoit Sanchez. The optimal ridge penalty for real-world high-dimensional data can be zero or negative due to the implicit ridge regularization. *Journal of Machine Learning Research*, 21(169):1–16, 2020.
- [KP02] V. Koltchinskii and D. Panchenko. Empirical Margin Distributions and Bounding the Generalization Error of Combined Classifiers. *The Annals of Statistics*, 30(1):1 – 50, 2002.
- [KS18] Himanshu Kumar and P. S. Sastry. Robust loss functions for learning multi-class classifiers. In *2018 IEEE International Conference on Systems, Man, and Cybernetics (SMC)*, pages 687–692, 2018.
- [KT21] Ganesh Ramachandra Kini and Christos Thrampoulidis. Phase transitions for one-vs-one and one-vs-all linear separability in multiclass gaussian mixtures. In *ICASSP 2021 - 2021 IEEE International Conference on Acoustics, Speech and Signal Processing (ICASSP)*, pages 4020–4024, 2021.
- [LDBK15] Yunwen Lei, Urun Dogan, Alexander Binder, and Marius Kloft. Multi-class svms: From tighter data-dependent generalization bounds to novel algorithms. In C. Cortes, N. Lawrence, D. Lee, M. Sugiyama, and R. Garnett, editors, *Advances in Neural Information Processing Systems*, volume 28. Curran Associates, Inc., 2015.
- [LDZK19] Yunwen Lei, Ürün Dogan, Ding-Xuan Zhou, and Marius Kloft. Data-dependent generalization bounds for multi-class classification. *IEEE Transactions on Information Theory*, 65(5):2995–3021, 2019.
- [LLW04] Yoonkyung Lee, Yi Lin, and Grace Wahba. Multicategory support vector machines. *Journal of the American Statistical Association*, 99(465):67–81, 2004.
- [Lol20] Panagiotis Lolas. Regularization in high-dimensional regression and classification via random matrix theory. *arXiv preprint arXiv:2003.13723*, 2020.
- [LR21] Tengyuan Liang and Benjamin Recht. Interpolating classifiers make few mistakes. *arXiv preprint arXiv:2101.11815*, 2021.
- [LS20] Tengyuan Liang and Pragya Sur. A precise high-dimensional asymptotic theory for boosting and min-l1-norm interpolated classifiers. *arXiv preprint arXiv:2002.01586*, 2020.

- [Mau16] Andreas Maurer. A vector-contraction inequality for rademacher complexities. In Ronald Ortner, Hans Ulrich Simon, and Sandra Zilles, editors, *Algorithmic Learning Theory*, pages 3–17, Cham, 2016. Springer International Publishing.
- [MLC19] Xiaoyi Mai, Zhenyu Liao, and Romain Couillet. A large scale analysis of logistic regression: Asymptotic performance and new insights. In *ICASSP 2019 - 2019 IEEE International Conference on Acoustics, Speech and Signal Processing (ICASSP)*, pages 3357–3361, 2019.
- [MNS<sup>+</sup>20] Vidya Muthukumar, Adhyayan Narang, Vignesh Subramanian, Mikhail Belkin, Daniel Hsu, and Anant Sahai. Classification vs regression in overparameterized regimes: Does the loss function matter? *arXiv preprint arXiv:2005.08054*, 2020.
- [MO05] Dörthe Malzahn and Manfred Opper. A statistical physics approach for the analysis of machine learning algorithms on real data. *Journal of Statistical Mechanics: Theory and Experiment*, 2005(11):P11001–P11001, nov 2005.
- [MRSY19] Andrea Montanari, Feng Ruan, Youngtak Sohn, and Jun Yan. The generalization error of max-margin linear classifiers: High-dimensional asymptotics in the overparametrized regime. *arXiv preprint arXiv:1911.01544*, 2019.
- [MVSS20] Vidya Muthukumar, Kailas Vodrahalli, Vignesh Subramanian, and Anant Sahai. Harmless interpolation of noisy data in regression. *IEEE Journal on Selected Areas in Information Theory*, 2020.
- [PGS13] Bernardo Ávila Pires, Mohammad Ghavamzadeh, and Csaba Szepesvári. Cost-sensitive multiclass classification risk bounds. In *Proceedings of the 30th International Conference on International Conference on Machine Learning - Volume 28, ICML’13*, page III–1391–III–1399. JMLR.org, 2013.
- [PHD20] Vardan Papyan, X. Y. Han, and David L. Donoho. Prevalence of neural collapse during the terminal phase of deep learning training. *Proceedings of the National Academy of Sciences*, 117(40):24652–24663, 2020.
- [PL20] Tomaso Poggio and Qianli Liao. Explicit regularization and implicit bias in deep network classifiers trained with the square loss. *arXiv preprint arXiv:2101.00072*, 2020.
- [PS16] Bernardo Ávila Pires and Csaba Szepesvári. Multiclass classification calibration functions. *arXiv preprint arXiv:1609.06385*, 2016.
- [RDS<sup>+</sup>15] Olga Russakovsky, Jia Deng, Hao Su, Jonathan Krause, Sanjeev Satheesh, Sean Ma, Zhiheng Huang, Andrej Karpathy, Aditya Khosla, Michael Bernstein, et al. Imagenet large scale visual recognition challenge. *International journal of computer vision*, 115(3):211–252, 2015.
- [Rif02] Ryan Michael Rifkin. *Everything old is new again: a fresh look at historical approaches in machine learning*. PhD thesis, MaSSachuSettS InStitute of Technology, 2002.
- [RK04] Ryan Rifkin and Aldebaro Klautau. In defense of one-vs-all classification. *Journal of Machine Learning Research*, 5:101–141, 2004.
- [RV<sup>+</sup>13] Mark Rudelson, Roman Vershynin, et al. Hanson-wright inequality and sub-gaussian concentration. *Electronic Communications in Probability*, 18, 2013.
- [SAH19] Fariborz Salehi, Ehsan Abbasi, and Babak Hassibi. The impact of regularization on high-dimensional logistic regression. In H. Wallach, H. Larochelle, A. Beygelzimer, F. d’Alché-Buc, E. Fox, and R. Garnett, editors, *Advances in Neural Information Processing Systems*, volume 32. Curran Associates, Inc., 2019.
- [SAH20] Fariborz Salehi, Ehsan Abbasi, and Babak Hassibi. The performance analysis of generalized margin maximizers on separable data. In *International Conference on Machine Learning*, pages 8417–8426. PMLR, 2020.

- [SC19] Pragya Sur and Emmanuel J Candès. A modern maximum-likelihood theory for high-dimensional logistic regression. *Proceedings of the National Academy of Sciences*, 116(29):14516–14525, 2019.
- [SFBL98] Robert E Schapire, Yoav Freund, Peter Bartlett, and Wee Sun Lee. Boosting the margin: A new explanation for the effectiveness of voting methods. *The Annals of Statistics*, 26(5):1651–1686, 1998.
- [SHN<sup>+</sup>18] Daniel Soudry, Elad Hoffer, Mor Shpigel Nacson, Suriya Gunasekar, and Nathan Srebro. The implicit bias of gradient descent on separable data. *Journal of Machine Learning Research*, 19(1):2822–2878, 2018.
- [TB07] Ambuj Tewari and Peter L Bartlett. On the consistency of multiclass classification methods. *Journal of Machine Learning Research*, 8(36):1007–1025, 2007.
- [TB20] Alexander Tsigler and Peter L Bartlett. Benign overfitting in ridge regression. *arXiv preprint arXiv:2009.14286*, 2020.
- [TOS20] Christos Thrampoulidis, Samet Oymak, and Mahdi Soltanolkotabi. Theoretical insights into multiclass classification: A high-dimensional asymptotic view. In H. Larochelle, M. Ranzato, R. Hadsell, M. F. Balcan, and H. Lin, editors, *Advances in Neural Information Processing Systems*, volume 33, pages 8907–8920. Curran Associates, Inc., 2020.
- [TPT20] Hossein Taheri, Ramtin Pedarsani, and Christos Thrampoulidis. Sharp asymptotics and optimal performance for inference in binary models. In Silvia Chiappa and Roberto Calandra, editors, *Proceedings of the Twenty Third International Conference on Artificial Intelligence and Statistics*, volume 108 of *Proceedings of Machine Learning Research*, pages 3739–3749. PMLR, 26–28 Aug 2020.
- [TPT21] Hossein Taheri, Ramtin Pedarsani, and Christos Thrampoulidis. Fundamental limits of ridge-regularized empirical risk minimization in high dimensions. In Arindam Banerjee and Kenji Fukumizu, editors, *Proceedings of The 24th International Conference on Artificial Intelligence and Statistics*, volume 130 of *Proceedings of Machine Learning Research*, pages 2773–2781. PMLR, 13–15 Apr 2021.
- [Vap13] Vladimir Vapnik. *The nature of statistical learning theory*. Springer science & business media, 2013.
- [Wai19] Martin J Wainwright. *High-dimensional statistics: A non-asymptotic viewpoint*, volume 48. Cambridge University Press, 2019.
- [WT21] Ke Wang and Christos Thrampoulidis. Binary classification of gaussian mixtures: Abundance of support vectors, benign overfitting and regularization. *arXiv preprint arXiv:2011.09148*, 2021.
- [WW98] Jason Weston and Chris Watkins. Multi-class support vector machines. Technical report, Citeseer, 1998.
- [Zha04] Tong Zhang. Statistical behavior and consistency of classification methods based on convex risk minimization. *The Annals of Statistics*, 32(1):56–85, 2004.

## Checklist

1. For all authors...
  - (a) Do the main claims made in the abstract and introduction accurately reflect the paper’s contributions and scope? [\[Yes\]](#) We provide a point-by-point description of our contributions in Section 1.1 that reflect the abstract and introduction.
  - (b) Did you describe the limitations of your work? [\[Yes\]](#) We introduce the background and list all the assumptions in the paper. We also discuss limitations and scope for future work in context with the main results as well as in the conclusion.

- (c) Did you discuss any potential negative societal impacts of your work? [N/A] This paper contains purely theoretical analysis that aims to explain the performance of modern ML models, and does not contribute new methodology. Thus, it is unlikely to have either positive or negative social impact.
  - (d) Have you read the ethics review guidelines and ensured that your paper conforms to them? [Yes]
2. If you are including theoretical results...
- (a) Did you state the full set of assumptions of all theoretical results? [Yes] Our assumptions are stated in Sections 3 and 4.
  - (b) Did you include complete proofs of all theoretical results? [Yes] We present a proof sketch in the main text and include the complete proofs in the supplementary material.
3. If you ran experiments...
- (a) Did you include the code, data, and instructions needed to reproduce the main experimental results (either in the supplemental material or as a URL)? [Yes] We include the code that creates the figures in our paper and will submit it as supplementary material. We note that the main contributions of our paper are theoretical, and our simulations on synthetic are intended to support these results rather than constitute results.
  - (b) Did you specify all the training details (e.g., data splits, hyperparameters, how they were chosen)? [Yes] We specify our model settings and how we design the experiments, i.e., number of random samples, parameter values, in our paper.
  - (c) Did you report error bars (e.g., with respect to the random seed after running experiments multiple times)? [Yes] We report the results with standard deviation in the supplementary material.
  - (d) Did you include the total amount of compute and the type of resources used (e.g., type of GPUs, internal cluster, or cloud provider)? [N/A]
4. If you are using existing assets (e.g., code, data, models) or curating/releasing new assets...
- (a) If your work uses existing assets, did you cite the creators? [N/A] Not using existing assets or releasing new assets.
  - (b) Did you mention the license of the assets? [N/A] Not using existing assets or releasing new assets.
  - (c) Did you include any new assets either in the supplemental material or as a URL? [N/A] Not using existing assets or releasing new assets.
  - (d) Did you discuss whether and how consent was obtained from people whose data you're using/curating? [N/A] Not using existing assets or releasing new assets.
  - (e) Did you discuss whether the data you are using/curating contains personally identifiable information or offensive content? [N/A] Not using existing assets or releasing new assets.
5. If you used crowdsourcing or conducted research with human subjects...
- (a) Did you include the full text of instructions given to participants and screenshots, if applicable? [N/A] We did not use crowdsourcing or conduct research with human subjects.
  - (b) Did you describe any potential participant risks, with links to Institutional Review Board (IRB) approvals, if applicable? [N/A] We did not use crowdsourcing or conduct research with human subjects.
  - (c) Did you include the estimated hourly wage paid to participants and the total amount spent on participant compensation? [N/A] We did not use crowdsourcing or conduct research with human subjects.

## Contents

|                                                                     |           |
|---------------------------------------------------------------------|-----------|
| <b>A Experiment details and additional results</b>                  | <b>18</b> |
| <b>B Proofs for Section 3.1</b>                                     | <b>19</b> |
| B.1 Detailed proof of Theorem 1 . . . . .                           | 19        |
| B.2 Detailed proof of Corollary 1 . . . . .                         | 22        |
| <b>C Proof of Theorem 2</b>                                         | <b>22</b> |
| C.1 Notation and proof strategy . . . . .                           | 22        |
| C.2 Proof of Theorem 2 . . . . .                                    | 23        |
| C.3 Auxiliary Lemmas . . . . .                                      | 25        |
| C.4 Proof of Lemma 2 . . . . .                                      | 26        |
| C.4.1 Proof outline . . . . .                                       | 26        |
| C.4.2 Proofs for 1-st order quadratic forms in Eqn. (39) . . . . .  | 27        |
| C.4.3 Completing the proof for k-th order quadratic forms . . . . . | 32        |
| C.5 Proofs of Auxiliary lemmas . . . . .                            | 33        |
| C.5.1 Proof of Lemma 3 . . . . .                                    | 33        |
| C.5.2 Proof of Lemma 5 . . . . .                                    | 33        |
| C.5.3 Proof of Lemma 6 . . . . .                                    | 34        |
| <b>D Proofs for Section 3.2.2</b>                                   | <b>36</b> |
| D.1 Proof of Theorem 3 . . . . .                                    | 36        |
| D.2 Proof of Theorem 4 . . . . .                                    | 38        |
| <b>E Classification error proofs</b>                                | <b>39</b> |
| E.1 Proof of Theorem 5 . . . . .                                    | 39        |
| E.1.1 Proof strategy and notations . . . . .                        | 39        |
| E.1.2 Proof of Equation (58) . . . . .                              | 40        |
| E.1.3 Completing the proof . . . . .                                | 42        |
| E.1.4 Proof of Equation (57) . . . . .                              | 43        |
| E.1.5 Extensions to unorthogonal means . . . . .                    | 43        |
| E.2 Proof of Corollary 2 . . . . .                                  | 44        |
| E.3 Error analysis for MLM . . . . .                                | 44        |
| E.3.1 Proof of Lemma 13 . . . . .                                   | 48        |
| E.3.2 Proof of Lemma 14 . . . . .                                   | 49        |
| <b>F Recursive formulas for higher-order quadratic forms</b>        | <b>50</b> |
| F.1 Expressions for 1-st order quadratic forms . . . . .            | 51        |
| <b>G One-vs-all SVM</b>                                             | <b>52</b> |
| G.1 Gaussian mixture model . . . . .                                | 52        |

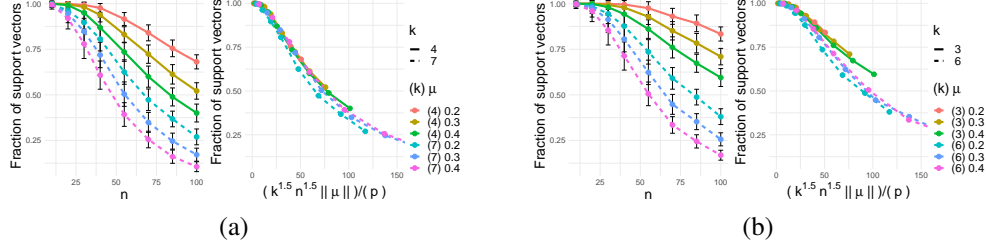

Figure 4: Fraction of support vectors satisfying Equation (10). The error bars show the standard deviation. (a)  $k = 4$  and  $7$ , (b)  $k = 3$  and  $6$ . On the legend, "(4) 0.3" means 4 classes and  $\|\mu\|_2/\sqrt{p} = 0.3$ . The curves nearly overlap when plotted versus  $k^{1.5}n^{1.5}\|\mu\|_2/p$  as predicted by the second condition in Equation (16) of Theorem 2.

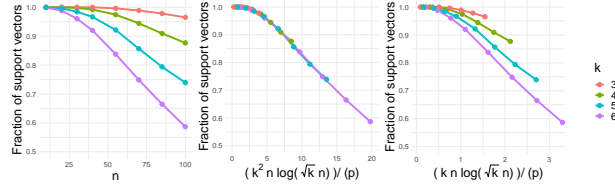

Figure 5: The plot shows the fraction of support vectors under MLM with different number of classes. The curves overlap when plotted versus  $k^2 n \log(\sqrt{k}n)/p$  (Middle plot) as predicted by Theorem 4.

G.2 Multinomial logistic model . . . . . 53

H One-vs-one SVM . . . . . 54

## A Experiment details and additional results

We first present numerical results that confirm our conclusions in Theorem 2. We also discuss the tightness of the two sufficient conditions in Eqn.(16). Recall that throughout the paper, in all our figures, we show averages over 100 Monte-Carlo realizations. In Fig. 4(a) (same as Figure 2(a), repeated here for convenience), we solved the multiclass SVM and plotted the *fraction of support vectors satisfying Equation (10)* as a function of training size  $n$ . The error bars show the standard deviation at each point. We fixed dimension  $p = 1000$  and class priors  $\pi = \frac{1}{k}$ . To study how the outcome depends on the number of classes  $k$  and mean strength  $\|\mu\|_2$ , we experimented with two values of class number  $k = 4, 7$  and three equal-energy scenarios where  $\forall c \in [k] : \|\mu_c\|_2 = \|\mu\|_2 = \mu\sqrt{p}$  with  $\mu = 0.2, 0.3, 0.4$ . Fig. 4(a)(Left) shows how the fraction of support vectors changes with  $n$ . Observe that smaller  $\mu$  results in larger proportion of support vectors for the same  $n$ . To verify our theorem's second condition in Equation (16), Fig. 4(a)(Right) plots the same set of curves over a re-scaled axis  $k^{1.5}n^{1.5}\|\mu\|_2/p$ . The 6 curves corresponding to different settings nearly overlap in this new scaling, which suggests the correct order of the corresponding condition. In Fig. 4(b), we repeat the experiment in Fig. 4(a) for different values of  $k = 3$  and  $k = 6$ . Again, these curves nearly overlap when the x-axis is scaled according to the second condition in Equation (16).

We next confirm our results in Theorem 3 in Fig. 5. (The first two subplots are same as Figure 2(b), repeated here for convenience.) Here, we fixed  $p = 1000$ , varied  $n$  from 10 to 100 and the numbers of classes from  $k = 3$  to  $k = 6$ . We chose orthogonal mean vectors for each class with equal energy  $\|\mu\|_2^2 = p$  and solved multiclass SVM. Fig. 5(Left) shows the fraction of support vectors satisfying Equation (10) as a function of  $n$ . Clearly, smaller  $k$  results in higher proportion of support vectors with the desired property for the same number of measurements  $n$ . To verify the condition in Theorem 4, Fig. 5(Middle) plots the same curves over a re-scaled axis  $k^2 n \log(\sqrt{k}n)/p$  (as suggested by Theorem 4). We additionally draw the same curves over  $kn \log(\sqrt{k}n)/p$  in Fig. 4(Right). Note the overlap of the curves in the middle plot.

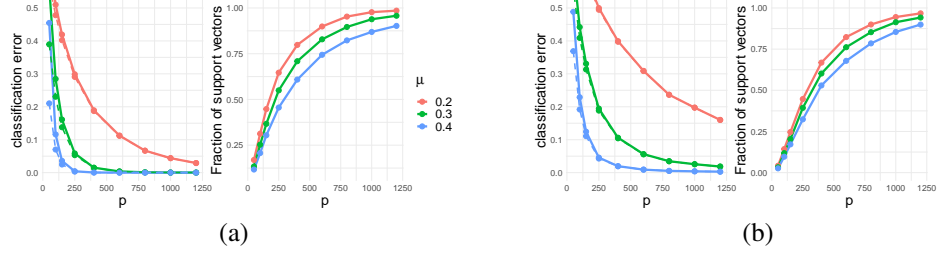

Figure 6: The plot shows the classification error and fraction of support vectors. (a) sets  $k = 4$  and (b) sets 6. The mean vector  $\|\mu\|_2 = \mu\sqrt{p}$ , where  $\mu = 0.2, 0.3$  and  $0.4$ . We can see the classification errors approach 0 and the fractions of support vectors approach 1 as  $p$  gets larger.

Finally, we present numerical illustrations validating our results in Corollary 2. In Fig. 6(a), we set the number of classes  $k = 4$ . To guarantee sufficient overparameterization, we fix  $n = 40$  and vary  $p$  from 50 to 1200. In Fig. 6(a)(Left), we plot the classification error as a function of  $p$  for both MNI estimates (solid lines) and multiclass SVM solutions (dashed lines). Different colors correspond to different mean norms. The solid and dashed curves almost overlap as predicted from our results in Section 3. We simulated 3 different settings for the mean matrices: each has orthogonal and equal-norm mean vectors  $\|\mu\|_2 = \mu\sqrt{p}$ , with  $\mu = 0.2, 0.3$  and  $0.4$ . We verify that as  $p$  increases, the classification error decreases towards zero. Fig. 6(a)(Right) shows the fraction of support vectors satisfying (10) among all the constraints in (3). The probabilities approach 1 as  $p$  gets larger. Also, we see that the classification error goes to zero very fast when  $\mu$  is large, but then the proportion of support vectors increases at a slow rate. In contrast, when  $\mu$  is small, the proportion of support vectors increases fast, but the classification error decreases slowly. In Fig. 6(b), we use the same setting as in Fig. 6(a) except for the number of classes  $k = 6$  and  $n = 30$ . The rate at which classification error goes to zero and the proportion of support vectors increase, both become slower as now there are more classes.

## B Proofs for Section 3.1

In this section, we provide the proofs of deterministic equivalence between the multiclass SVM, OvA SVM and MNI classifiers. We begin with the proof of Theorem 1.

### B.1 Detailed proof of Theorem 1

We start by writing the dual of the multiclass SVM, repeated here for convenience.

$$\min_{\mathbf{W}} \frac{1}{2} \|\mathbf{W}\|_F^2 \quad \text{sub. to } (\mathbf{w}_{y_i} - \mathbf{w}_c)^\top \mathbf{x}_i \geq 1, \forall i \in [n], c \in [k] : c \neq y_i. \quad (17)$$

We have dual variables  $\{\lambda_{c,i}\}$  for every  $i \in [n], c \in [k] : c \neq y_i$  corresponding to the constraints on the primal form above. Then, the dual of the multiclass SVM takes the form

$$\max_{\lambda_{c,i} \geq 0} \sum_{i \in [n]} \left( \sum_{\substack{c \in [k] \\ c \neq y_i}} \lambda_{c,i} \right) - \frac{1}{2} \sum_{c \in [k]} \left\| \sum_{i \in [n] : y_i = c} \left( \sum_{\substack{c' \in [k] \\ c' \neq y_i}} \lambda_{c',i} \right) \mathbf{x}_i - \sum_{i \in [n] : y_i \neq c} \lambda_{c,i} \mathbf{x}_i \right\|_2^2. \quad (18)$$

Let  $\hat{\lambda}_{c,i}, i \in [n], c \in [k] : c \neq y_i$  be the maximizers in Equation (18). By complementary slackness, we have

$$\hat{\lambda}_{c,i} > 0 \implies (\hat{\mathbf{w}}_{y_i} - \hat{\mathbf{w}}_c)^\top \mathbf{x}_i = 1. \quad (19)$$

Thus, it will suffice to prove that  $\hat{\lambda}_{c,i} > 0, \forall i \in [n], c \in [k] : c \neq y_i$  provided that (8) holds.

**Key alternative parameterization of the dual.** It is challenging to work directly with Equation (18) because the variables  $\lambda_{c,i}$  are coupled in the objective function. Our main idea is to re-parameterize

the dual objective in terms of new variables  $\{\beta_{c,i}\}$ , which we define as follows for all  $c \in [k]$  and  $i \in [n]$ :

$$\beta_{c,i} = \begin{cases} \sum_{c' \neq y_i} \lambda_{c',i} & , y_i = c, \\ -\lambda_{c,i} & , y_i \neq c. \end{cases} \quad (20)$$

For each  $c \in [k]$ , we denote  $\beta_c = [\beta_{c,1}, \beta_{c,2}, \dots, \beta_{c,n}] \in \mathbb{R}^n$ . With these, we show that the dual objective becomes

$$\sum_{c \in [k]} \beta_c^\top \mathbf{z}_c - \frac{1}{2} \sum_{c \in [k]} \left\| \sum_{i \in [n]} \beta_{c,i} \mathbf{x}_i \right\|_2^2 = \sum_{c \in [k]} \beta_c^\top \mathbf{z}_c - \frac{1}{2} \|\mathbf{X} \beta_c\|_2^2. \quad (21)$$

The equivalence of the quadratic term in  $\beta$  is straightforward. To show the equivalence of the linear term in  $\beta$ , we denote  $A := \sum_{i \in [n]} \left( \sum_{c \in [k], c \neq y_i} \lambda_{c,i} \right)$ , and simultaneously get

$$A = \sum_{i \in [n]} \beta_{y_i,i} \quad \text{and} \quad A = \sum_{i \in [n]} \sum_{c \neq y_i} (-\beta_{c,i}),$$

by the definition of variables  $\{\beta_{c,i}\}$  in Equation (20). Then, we have

$$\begin{aligned} A &= \frac{k-1}{k} \cdot A + \frac{1}{k} \cdot A = \frac{k-1}{k} \sum_{i \in [n]} \beta_{y_i,i} + \frac{1}{k} \sum_{i \in [n]} \sum_{c \neq y_i} (-\beta_{c,i}) \\ &\stackrel{(i)}{=} \sum_{i \in [n]} \mathbf{z}_{y_i,i} \beta_{y_i,i} + \sum_{i \in [n]} \sum_{c \neq y_i} \mathbf{z}_{c,i} \beta_{c,i} \\ &= \sum_{i \in [n]} \sum_{c \in [k]} \mathbf{z}_{c,i} \beta_{c,i} = \sum_{c \in [k]} \beta_c^\top \mathbf{z}_c. \end{aligned}$$

Above, inequality (i) follows from the definition of  $\mathbf{z}_c$  in Equation (7), rewritten coordinate-wise as:

$$z_{c,i} = \begin{cases} \frac{k-1}{k}, & y_i = c, \\ -\frac{1}{k}, & y_i \neq c. \end{cases}$$

Thus, we have shown that the objective of the dual can be rewritten in terms of variables  $\{\beta_{c,i}\}$ . After rewriting the constraints in terms of  $\{\beta_{c,i}\}$ , the dual of the SVM (Equation (3)) can be equivalently written as:

$$\begin{aligned} &\max_{\beta_c \in \mathbb{R}^n, c \in [k]} \sum_{c \in [k]} \beta_c^\top \mathbf{z}_c - \frac{1}{2} \|\mathbf{X} \beta_c\|_2^2 \\ &\text{sub. to} \quad \beta_{y_i,i} = - \sum_{c \neq y_i} \beta_{c,i}, \quad \forall i \in [n] \quad \text{and} \quad \beta_c \odot \mathbf{z}_c \geq \mathbf{0}, \quad \forall c \in [k]. \end{aligned} \quad (22)$$

Note that the first constraint above ensures consistency with the definition of  $\beta_c$  in Eqn. (20). The second constraint guarantees the non-negativity constraint of the original dual variables in (18), because we have

$$\beta_{c,i} z_{c,i} = \frac{\lambda_{c,i}}{k} \text{ for all } i \in [n], c \in [k] : c \neq y_i.$$

Consequently, we have

$$\beta_{c,i} z_{c,i} \geq 0 \iff \lambda_{c,i} \geq 0 \quad (23)$$

for all  $c \in [k]$  and  $i \in [n] : y_i \neq c$ . In fact, the equivalence above also holds with the inequalities replaced by strict inequalities. Also note that the second constraint for  $c = y_i$  yields  $\frac{k-1}{k} \sum_{c' \neq y_i} \lambda_{c',i} \geq 0$ , which is automatically satisfied when Equation (23) is satisfied. Thus, these constraints are redundant.

**Proof of Equation (9).** Let  $\hat{\beta}_c, c \in [k]$  be the unconstrained maximizer in (22), i.e.

$$\hat{\beta}_c = (\mathbf{X}^\top \mathbf{X})^{-1} \mathbf{z}_c, \quad \forall c \in [k].$$

We will show that the unconstrained maximizer  $\hat{\beta}_c, c \in [k]$  is feasible in the constrained program in (22). Thus, it is its unique optimal solution.

To prove this, we will first prove that  $\hat{\beta}_c, c \in [k]$  satisfies the  $n$  equality constraints in (22). For convenience, let  $\mathbf{g}_i \in \mathbb{R}^n, i \in [n]$  denote the  $i$ -th row of  $(\mathbf{X}^\top \mathbf{X})^{-1}$ . Then, for the  $i$ -th element  $\hat{\beta}_{c,i}$  of  $\hat{\beta}_c$ , it holds that  $\hat{\beta}_{c,i} = \mathbf{g}_i^\top \mathbf{z}_c$ . Thus, for all  $i \in [n]$ , we have

$$\hat{\beta}_{y_i,i} + \sum_{c \neq y_i} \hat{\beta}_{c,i} = \mathbf{g}_i^\top \left( \mathbf{z}_{y_i} + \sum_{c \neq y_i} \mathbf{z}_c \right) = \mathbf{g}_i^\top \left( \sum_{c \in [k]} \mathbf{z}_c \right) = 0,$$

where in the last equality we used the definition of  $\mathbf{z}_c$  in (7) and the fact that  $\sum_{c \in [k]} \mathbf{v}_c = \mathbf{1}_n$ , since each column of the label matrix  $\mathbf{Y}$  has exactly one non-zero element equal to 1. Second, since Equation (8) holds,  $\hat{\beta}_c, c \in [k]$  further satisfies the  $n$  strict inequality constraints in (22).

We have shown that the unconstrained maximizer is feasible in the constrained program (22). Thus, we can conclude that it is also the solution to the latter. By Equation (23), we note that the original dual variables  $\{\lambda_{c,i}\}$  are all strictly positive. This completes the proof of the first part of the theorem, i.e. the proof of Equation (9).

**Proof of Equation (10).** To prove Equation (10), consider the following OvA-type classifier: for all  $c \in [k]$ ,

$$\min_{\mathbf{w}_c} \frac{1}{2} \|\mathbf{w}_c\|_2^2 \quad \text{sub. to} \quad \mathbf{x}_i^\top \mathbf{w}_c \begin{cases} \geq \frac{k-1}{k}, & y_i = c, \\ \leq -\frac{1}{k}, & y_i \neq c, \end{cases} \quad \forall i \in [n]. \quad (24)$$

To see the connection with Equation (10), note the condition for the constraints in (24) to be active is exactly Equation (10). Thus, it suffices to prove that the constraints of (24) are active under the theorem's assumptions. We work again with the dual of (24):

$$\max_{\boldsymbol{\nu}_c \in \mathbb{R}^k} -\frac{1}{2} \|\mathbf{X} \boldsymbol{\nu}_c\|_2^2 + \mathbf{z}_c^\top \boldsymbol{\nu}_c \quad \text{sub. to} \quad \mathbf{z}_c \odot \boldsymbol{\nu}_c \geq \mathbf{0}. \quad (25)$$

Again by complementary slackness, the desired Equation (10) holds provided that all dual constraints in (25) are strict at the optimal.

We now observe two critical similarities between (25) and (22): (i) the two dual problems have the same objectives (indeed the objective in (22) is separable over  $c \in [k]$ ); (ii) they share the constraint  $\mathbf{z}_c \odot \boldsymbol{\nu}_c \geq \mathbf{0} / \mathbf{z}_c \odot \beta_c \geq \mathbf{0}$ . From this observation, we can use the same argument as for (22) to show that when Eqn. (8) holds,  $\hat{\beta}_c$  is optimal in (25).

Now, let  $\text{OPT}_{(17)}$  and  $\text{OPT}_{(24)}^c$  be the optimal costs of the multiclass SVM in (17) and of the symmetric OvA-SVM in (24) parameterized by  $c \in [k]$ . Also, denote  $\text{OPT}_{(22)}$  and  $\text{OPT}_{(25)}^c, c \in [k]$  the optimal costs of their respective duals in (22) and (25), respectively. We proved above that

$$\text{OPT}_{(22)} = \sum_{c \in [k]} \text{OPT}_{(25)}^c. \quad (26)$$

Further let  $\mathbf{W}_{\text{sym-OvA}} = [\mathbf{w}_{\text{sym-OvA},1}, \dots, \mathbf{w}_{\text{sym-OvA},k}]$  be the optimal solution in the symmetric OvA-SVM in (25). We have proved that under Equation (8)  $\mathbf{w}_c^*$  satisfies the constraints in (25) with equality, that is  $\mathbf{X}^\top \mathbf{w}_{\text{sym-OvA},c} = \mathbf{z}_c, \forall c \in [k]$ . Thus, it suffices to prove that  $\mathbf{W}_{\text{sym-OvA}} = \mathbf{W}_{\text{SVM}}$ . By strong duality, we get

$$\begin{aligned} \text{OPT}_{(24)}^c = \text{OPT}_{(25)}^c, c \in [k] &\implies \sum_{c \in [k]} \text{OPT}_{(24)}^c = \sum_{c \in [k]} \text{OPT}_{(25)}^c \\ &\stackrel{(26)}{\implies} \sum_{c \in [k]} \text{OPT}_{(24)}^c = \text{OPT}_{(22)} \\ &\stackrel{(24)}{\implies} \sum_{c \in [k]} \frac{1}{2} \|\mathbf{w}_{\text{sym-OvA},c}\|_2^2 = \text{OPT}_{(22)}. \end{aligned} \quad (27)$$

Again, by strong duality we get  $\text{OPT}_{(22)} = \text{OPT}_{(17)}$ . Thus, we have

$$\sum_{c \in [k]} \frac{1}{2} \|\mathbf{w}_{\text{sym-OvA},c}\|_2^2 = \text{OPT}_{(17)}.$$

Note also that  $\mathbf{W}_{\text{OvA}}$  is feasible in (17) since

$$\mathbf{X}^\top \mathbf{w}_{\text{sym-OvA},c} = \mathbf{z}_c, \forall c \in [k] \implies (\mathbf{w}_{\text{sym-OvA},y_i} - \mathbf{w}_{\text{sym-OvA},c})^\top \mathbf{x}_i = 1, \forall c \neq y_i, c \in [k], \text{ and } \forall i \in [n].$$

Therefore,  $\mathbf{W}_{\text{sym-OvA}}$  is optimal in (17). Finally, note that the optimization objective in (17) is strongly convex. Thus, it has a unique minimum and therefore  $\mathbf{W}_{\text{SVM}} = \mathbf{W}_{\text{sym-OvA}}$  as desired.

## B.2 Detailed proof of Corollary 1

The corollary follows directly by combining Theorem 1 with the following lemma.

**Lemma 1.** Fix arbitrary constants  $\alpha > 0, \beta$  and consider the MNI-solution  $\mathbf{w}_c^{\alpha,\beta} = \mathbf{X}(\mathbf{X}^\top \mathbf{X})^{-1}(\alpha \mathbf{v}_c + \beta \mathbf{1}), c \in [k]$  corresponding to a target vector of labels  $\alpha \mathbf{v}_c + \beta \mathbf{1}_n$ . Let  $\mathbb{P}_{e|c}^{\alpha,\beta}, c \in [k]$  be the class-conditional and total classification errors of the classifier  $\mathbf{w}^{\alpha,\beta}$ . Then, for any constants  $\alpha' > 0, \beta'$ , it holds that  $\mathbb{P}_{e|c}^{\alpha,\beta} = \mathbb{P}_{e|c}^{\alpha',\beta'}, \forall c \in [k]$ .

*Proof.* Note that  $\mathbf{w}_c^{\alpha=1,\beta=0} = \mathbf{w}_{\text{MNI},c}, c \in [k]$  and for arbitrary  $\alpha > 0, \beta$ , we have:  $\mathbf{w}_c^{\alpha,\beta} = \alpha \mathbf{w}_{\text{MNI},c} + \beta \mathbf{X}(\mathbf{X}^\top \mathbf{X})^{-1} \mathbf{1}$ . Moreover, it is not hard to check that  $\mathbf{w}_{\text{MNI},c}^\top \mathbf{x} \leq \max_{j \neq c} \mathbf{w}_{\text{MNI},j}^\top \mathbf{x}$  if and only if  $(\alpha \mathbf{w}_{\text{MNI},c} + \mathbf{b})^\top \mathbf{x} \leq \max_{j \neq c} (\alpha \mathbf{w}_{\text{MNI},j} + \mathbf{b})^\top \mathbf{x}$ , for any  $\mathbf{b} \in \mathbb{R}^p$ . The claim then follows by choosing  $\mathbf{b} = \beta \mathbf{X}(\mathbf{X}^\top \mathbf{X})^{-1} \mathbf{1}$  and noting that  $\alpha > 0, \beta$  were chosen arbitrarily.  $\square$

## C Proof of Theorem 2

In this section, we provide the proof of Theorem 2, which was stated and discussed in Section 3.2.1.

### C.1 Notation and proof strategy

We begin by defining notation that is specific to this proof. For  $c \in [k]$ , we define

$$\mathbf{A}_c := (\mathbf{Q} + \sum_{j=1}^c \mu_j \mathbf{v}_j^T)^T (\mathbf{Q} + \sum_{j=1}^c \mu_j \mathbf{v}_j^T).$$

Recall that in the above,  $\mu_j$  denotes the  $j^{\text{th}}$  class mean of dimension  $p$ , and  $\mathbf{v}_j$  denotes the  $n$ -dimensional indicator that each training example is labeled as class  $j$ . Since we have made an equal-energy assumption on the class means (Assumption 2), we will denote  $\|\mu\|_2 := \|\mu_c\|_2$  throughout this proof as shorthand. Further, recall from Eqn. (1) that the feature matrix can be expressed as  $\mathbf{X} = \mathbf{M}\mathbf{Y} + \mathbf{Q}$ , where  $\mathbf{Q} \in \mathbb{R}^{p \times n}$  is a standard Gaussian matrix. Thus, we have

$$\mathbf{X}^T \mathbf{X} = \mathbf{A}_k \quad \text{and} \quad \mathbf{Q}^T \mathbf{Q} = \mathbf{A}_0.$$

Further, let  $\mathbf{d}_c := \mathbf{Q}^T \mu_c$ , for  $c \in [k]$ . Finally, we define the following quadratic forms involving  $\mathbf{A}_c^{-1}$  for  $c, j, m \in [k]$  and  $i \in [n]$ :

$$\begin{aligned} s_{mj}^{(c)} &:= \mathbf{v}_m^T \mathbf{A}_c^{-1} \mathbf{v}_j, \\ t_{mj}^{(c)} &:= \mathbf{d}_m^T \mathbf{A}_c^{-1} \mathbf{d}_j, \\ h_{mj}^{(c)} &:= \mathbf{v}_m^T \mathbf{A}_c^{-1} \mathbf{d}_j, \\ g_{ji}^{(c)} &:= \mathbf{v}_j^T \mathbf{A}_c^{-1} \mathbf{e}_i, \\ f_{ji}^{(c)} &:= \mathbf{d}_j^T \mathbf{A}_c^{-1} \mathbf{e}_i. \end{aligned} \tag{28}$$

For convenience, we refer to terms above as *quadratic forms of order  $c$*  or *the  $c$ -th order quadratic forms*, where  $c$  indicates the corresponding superscript. Because of the sum of multiple mean components  $\sum_{j=1}^c \mu_j \mathbf{v}_j^T$ , it is challenging to bound the quadratic forms involving the Gram matrix  $\mathbf{A}_k^{-1}$  directly. Our idea is to work recursively starting from bounding quadratic forms involving  $\mathbf{A}_0^{-1}$ . Specifically, we denote  $\mathbf{P}_1 = \mathbf{Q} + \mu_1 \mathbf{v}_1^T$  and derive the following recursion on the  $\mathbf{A}_0, \mathbf{A}_1, \dots, \mathbf{A}_k$

matrices:

$$\begin{aligned}\mathbf{A}_1 &= \mathbf{P}_1^T \mathbf{P}_1 = \mathbf{A}_0 + \begin{bmatrix} \|\boldsymbol{\mu}\|_2 \mathbf{v}_1 & \mathbf{Q}^T \boldsymbol{\mu}_1 & \mathbf{v}_1 \end{bmatrix} \begin{bmatrix} \|\boldsymbol{\mu}\|_2 \mathbf{v}_1^T \\ \mathbf{v}_1^T \mathbf{Q} \\ \boldsymbol{\mu}_1^T \mathbf{Q} \end{bmatrix}, \\ \mathbf{A}_2 &= (\mathbf{P}_1 + \boldsymbol{\mu}_2 \mathbf{v}_2^T)^T (\mathbf{P}_1 + \boldsymbol{\mu}_2 \mathbf{v}_2^T) = \mathbf{A}_1 + \begin{bmatrix} \|\boldsymbol{\mu}\|_2 \mathbf{v}_2 & \mathbf{P}_1^T \boldsymbol{\mu}_2 & \mathbf{v}_2 \end{bmatrix} \begin{bmatrix} \|\boldsymbol{\mu}\|_2 \mathbf{v}_2^T \\ \mathbf{v}_2^T \mathbf{P}_1 \\ \boldsymbol{\mu}_2^T \mathbf{P}_1 \end{bmatrix},\end{aligned}\quad (29)$$

and so on, until  $\mathbf{A}_k$  (see Appendix F.1 for the complete expressions for the recursion). Using this trick, we can exploit bounds on forms involving  $\mathbf{A}_0^{-1}$  to obtain bounds for quadratic forms involving  $\mathbf{A}_1^{-1}$ , and so on until  $\mathbf{A}_k^{-1}$ . A complementary useful observation facilitating this approach is that the class label indicators are orthogonal by definition, i.e.  $\mathbf{v}_i^T \mathbf{v}_j = 0$ , for  $i, j \in [k]$ . (This is a consequence of the obvious fact that any training data point has a unique label.) Thus, the newly added mean component  $\boldsymbol{\mu}_{c+1} \mathbf{v}_{c+1}^T$  is orthogonal to the already existing mean components included in the matrix  $\mathbf{A}_c$ . Consequently, we will see that adding new mean components will only slightly change the magnitude of these quadratic forms as  $c$  ranges from 0 to  $k$ .

Following the above prescribed approach leads to a key technical Lemma 2, which is presented in Appendix C.2. In Appendix C.2, we also show how to prove Theorem 2 using that lemma. A series of auxiliary lemmas used to prove Lemma 2 are stated in Appendix C.3. The proofs of all the lemmas are given in the remaining subsections.

## C.2 Proof of Theorem 2

In our new notation, the desired inequality in Eqn. (8) becomes

$$z_{ci} \mathbf{e}_i^T \mathbf{A}_k^{-1} \mathbf{z}_c > 0, \text{ for all } c \in [k] \text{ and } i \in [n].$$

We can equivalently write the definition of  $\mathbf{z}_c$  in Eqn. (7) as

$$\mathbf{z}_c = \frac{k-1}{k} \mathbf{v}_c + \sum_{j \neq c} \left( -\frac{1}{k} \right) \mathbf{v}_j = \tilde{z}_{c(c)} \mathbf{v}_c + \sum_{j \neq c} \tilde{z}_{j(c)} \mathbf{v}_j, \quad (30)$$

where we denote

$$\tilde{z}_{j(c)} = \begin{cases} -\frac{1}{k}, & \text{if } j \neq c \\ \frac{k-1}{k}, & \text{if } j = c \end{cases}.$$

Note that by this definition, we have  $\tilde{z}_{y_i(c)} := z_{ci}$ . This gives us

$$\begin{aligned}z_{ci} \mathbf{e}_i^T \mathbf{A}_k^{-1} \mathbf{z}_c &= z_{ci}^2 \mathbf{e}_i^T \mathbf{A}_k^{-1} \mathbf{v}_{y_i} + \sum_{j \neq y_i} z_{ci} \tilde{z}_{j(c)} \mathbf{e}_i^T \mathbf{A}_k^{-1} \mathbf{v}_j, \\ &= z_{ci}^2 g_{y_i i}^{(k)} + \sum_{j \neq y_i} z_{ci} \tilde{z}_{j(c)} g_{ji}^{(k)}.\end{aligned}\quad (31)$$

Recall that

$$z_{ci} = \begin{cases} \frac{k-1}{k}, & \text{if } c = y_i \\ -\frac{1}{k}, & \text{if } c \neq y_i \end{cases}.$$

For each  $\mathbf{e}_i^T \mathbf{A}_k^{-1} \mathbf{v}_j$ , we then use the matrix inversion lemma to leave the  $j$ -th mean component in  $\mathbf{A}_k$  out. Using this, we can express the terms  $\{g_{ji}^{(k)}\}$  in terms of the *leave-one-out* versions of quadratic forms that we defined in (28), as below:

$$g_{ji}^{(k)} = \mathbf{e}_i^T \mathbf{A}_k^{-1} \mathbf{v}_j = \frac{(1 + h_{jj}^{(-j)}) g_{ji}^{(-j)} - s_{jj}^{(-j)} f_{ji}^{(-j)}}{s_{jj}^{(-j)} (\|\boldsymbol{\mu}\|_2^2 - t_{jj}^{(-j)}) + (1 + h_{jj}^{(-j)})^2}. \quad (32)$$

Above, we define  $s_{jj}^{(-j)} := \mathbf{v}_j^T \mathbf{A}_{-j}^{-1} \mathbf{v}_j$ , where  $\mathbf{A}_{-j}$  denotes the version of the Gram matrix  $\mathbf{A}_k$  with the  $j$ -th mean component left out. The quadratic forms  $h_{jj}^{(-j)}$ ,  $f_{ji}^{(-j)}$ ,  $g_{ji}^{(-j)}$  and  $t_{jj}^{(-j)}$  are defined similarly. The following technical lemma bounds all of these quantities.

**Lemma 2** (Quadratic forms of high orders). *Let Assumption 1 hold and further assume that  $p > Ck^3n \log(kn) + n - 1$  for large enough constant  $C > 1$  and large  $n$ . There exist constants  $c_i$ 's and  $C_i$ 's  $> 1$  such that the following bounds hold for every  $i \in [n]$  and  $j \in [k]$  with probability at least  $1 - \frac{c_1}{n} - c_2ke^{-\frac{n}{c_3k^2}}$ ,*

$$\begin{aligned} \frac{C_1 - 1}{C_1} \cdot \frac{n}{kp} &\leq s_{jj}^{(-j)} \leq \frac{C_1 + 1}{C_1} \cdot \frac{n}{kp}, \\ t_{jj}^{(-j)} &\leq \frac{C_2n\|\boldsymbol{\mu}\|_2^2}{p}, \\ -\frac{C_3n\|\boldsymbol{\mu}\|_2}{\sqrt{kp}} &\leq h_{jj}^{(-j)} \leq \frac{C_3n\|\boldsymbol{\mu}\|_2}{\sqrt{kp}}, \\ |f_{ji}^{(-j)}| &\leq \frac{C_4\sqrt{n}\|\boldsymbol{\mu}\|_2}{p}, \\ g_{ji}^{(-j)} &\geq \left(1 - \frac{1}{C_5}\right) \frac{1}{p}, \text{ for } j = y_i, \\ |g_{ji}^{(-j)}| &\leq \frac{1}{C_6k^2p}, \text{ for } j \neq y_i. \end{aligned}$$

Observe that the bounds stated in the lemma hold for any  $j \in [k]$  and the bounds themselves are independent of  $j$ . We now show how to use Lemma 2 to complete the proof of the theorem. Following the second condition in the statement of Theorem 2, we define

$$\epsilon := \frac{k^{1.5}n^{1.5}\|\boldsymbol{\mu}\|_2}{p} \leq \tau, \quad (33)$$

where  $\tau$  is a sufficiently small positive constant, the value of which will be specified later in the proof. First, we will show that the denominator of Eqn. (32) is strictly positive on the event where Lemma 2 holds. We define

$$\det_{-j} := s_{jj}^{(-j)}(\|\boldsymbol{\mu}\|_2^2 - t_{jj}^{(-j)}) + (1 + h_{jj}^{(-j)})^2.$$

By Lemma 2, the quadratic forms  $s_{jj}^{(-j)}$  are of the same order  $\Theta\left(\frac{n}{kp}\right)$  for every  $j \in [k]$ . Similarly, we have  $t_{jj}^{(-j)} = \mathcal{O}\left(\frac{n}{p}\|\boldsymbol{\mu}\|_2^2\right)$  and  $|h_{jj}^{(-j)}| = \mathcal{O}\left(\frac{\epsilon}{k^2\sqrt{n}}\right)$  for  $j \in [k]$ . Thus, we have

$$\frac{n\|\boldsymbol{\mu}\|_2^2}{C_1kp} \left(1 - \frac{C_2n}{p}\right) + \left(1 - \frac{C_3\epsilon}{k^2\sqrt{n}}\right)^2 \leq \det_{-j} \leq \frac{C_1n\|\boldsymbol{\mu}\|_2^2}{kp} + \left(1 + \frac{C_3\epsilon}{k^2\sqrt{n}}\right)^2, \quad (34)$$

with probability at least  $1 - \frac{c_1}{n} - c_2ke^{-\frac{n}{c_3k^2}}$ , for every  $j \in [k]$ . Here, we use the fact that  $t_{jj}^{(-j)} \geq 0$  by the positive semidefinite property of the leave-one-out Gram matrix  $\mathbf{A}_{-j}^{-1}$ . Next, we choose  $\tau$  in Eqn. (33) to be sufficiently small so that  $C_3\tau \leq 1/2$ . Provided that  $p$  is sufficiently large compared to  $n$ , there then exist constants  $C'_1, C'_2 > 0$  such that we have

$$C'_1 \leq \frac{\det_{-m}}{\det_{-j}} \leq C'_2, \text{ for all } j, m \in [k].$$

with probability at least  $1 - \frac{c_1}{n} - c_2ke^{-\frac{n}{c_3k^2}}$ . Now, assume without loss of generality that  $y_i = k$ . Eqn. (34) shows that there exists constant  $c > 0$  such that  $\det_{-j} > c$  for all  $j \in [k]$  with high probability provided that  $p/n$  is large enough (guaranteed by the first condition of the theorem). Hence, to make the right-hand-side of Eqn. (31) positive, it suffices to show that the numerator will be positive. Accordingly, we will show that

$$z_{ci}^2((1 + h_{kk}^{(-k)})g_{ki}^{(-k)} - s_{kk}^{(-k)}f_{ki}^{(-k)}) + Cz_{ci} \sum_{j \neq k} \tilde{z}_j((1 + h_{jj}^{(-j)})g_{ji}^{(-j)} - s_{jj}^{(-j)}f_{ji}^{(-j)}) > 0, \quad (35)$$

for some  $C > 1$ .

We can show by simple algebra that it suffices to consider the worst case of  $z_{ci} = -1/k$ . To see why this is true, we consider the simpler term  $z_{ci}^2g_{y_i i}^{(-y_i)} - |\sum_{j \neq y_i} z_{ci}\tilde{z}_j g_{ji}^{(-j)}|$ . Clearly, Eqn. (35) is

positive only if the above quantity is also positive. Lemma 2 shows that when  $z_{ci} = -1/k$ , then  $z_{ci}^2 g_{y_i i}^{(-y_i)} \geq \left(1 - \frac{1}{C_1}\right) \frac{1}{k^2 p}$  and  $|z_{ci} \tilde{z}_{j(c)} g_{ji}^{(-j)}| \leq \frac{1}{C_2 k^3 p}$ , for  $j \neq y_i$ . Hence

$$z_{ci}^2 g_{y_i i}^{(-y_i)} - \left| \sum_{j \neq y_i} z_{ci} \tilde{z}_{j(c)} g_{ji}^{(-j)} \right| \geq \left(1 - \frac{1}{C_3}\right) \frac{1}{k^2 p}.$$

Here,  $z_{ci} = -1/k$  minimizes the lower bound  $z_{ci}^2 g_{y_i i}^{(-y_i)} - \left| \sum_{j \neq y_i} z_{ci} \tilde{z}_{j(c)} g_{ji}^{(-j)} \right|$ . To see this, we first drop the positive common factor  $|z_{ci}|$  in the equation above and get  $|z_{ci}| g_{y_i i}^{(-y_i)} - \left| \sum_{j \neq y_i} \tilde{z}_{j(c)} g_{ji}^{(-j)} \right|$ . If we had  $z_{ci} = -1/k$ , then  $|\tilde{z}_{j(c)}|$  is either  $(k-1)/k$  or  $1/k$ . In contrast, if we consider  $z_{ci} = (k-1)/k$ , then we have  $|\tilde{z}_{j(c)}| = 1/k$  for all  $j \neq y_i$  and so the term  $|z_{ci}| g_{y_i i}^{(-y_i)} - \left| \sum_{j \neq y_i} \tilde{z}_{j(c)} g_{ji}^{(-j)} \right|$  is strictly larger.

Using this worst case, i.e.  $z_{ci} = -1/k$ , and the trivial inequality  $|\tilde{z}_{j(c)}| < 1$  for  $j \neq y_i$  together with the bounds for the terms  $s_{jj}^{(-j)}, t_{jj}^{(-j)}, h_{jj}^{(-j)}$  and  $f_{ji}^{(-j)}$  derived in Lemma 2 gives us

$$\begin{aligned} (35) &\geq \frac{1}{k^2} \left( \left(1 - \frac{C_1 \epsilon}{k^2 \sqrt{n}}\right) \left(1 - \frac{1}{C_2}\right) \frac{1}{p} - \frac{C_3 \epsilon}{k^{1.5} n} \cdot \frac{n}{kp} \right) - \frac{k}{C_4 k} \left( \left(1 + \frac{C_5 \epsilon}{k^2 \sqrt{n}}\right) \frac{1}{k^2 p} - \frac{C_6 \epsilon}{k^{1.5} n} \frac{n}{kp} \right) \\ &\geq \frac{1}{k^2} \left( 1 - \frac{1}{C_9} - \frac{C_{10} \epsilon}{k^2 \sqrt{n}} - \frac{C_{11} \epsilon}{k^2} - C_{12} \epsilon \right) \frac{1}{p} \\ &\geq \frac{1}{k^2 p} \left( 1 - \frac{1}{C_9} - C_{10} \tau \right), \end{aligned} \quad (36)$$

with probability at least  $1 - \frac{c_1}{n} - c_2 k e^{-\frac{n}{c_3 k^2}}$  for some constants  $C_i$ 's  $> 1$ . Above, we recalled the definition of  $\epsilon$  and used from Lemma 2 that  $h_{jj}^{(-j)} \leq \frac{C_{11} \epsilon}{k^2 \sqrt{n}}$  and  $|f_{ji}^{(-j)}| \leq \frac{C_{12} \epsilon}{k^{1.5} n}$  with high probability. To complete the proof, we choose  $\tau$  to be a small enough constant to guarantee  $C_{10} \tau < 1 - 1/C_9$ , and substitute this in Eqn. (36) to get the desired condition of Eqn. (35).

### C.3 Auxiliary Lemmas

In this section, we state a series of auxiliary lemmas that we use to prove Lemma 2. The following result shows concentration of the norms of the label indicators  $\mathbf{v}_c, c \in [k]$  under the equal-priors assumption (Assumption 1). Intuitively, in this balanced setting there are  $\Theta(n/k)$  samples for each class; hence,  $\Theta(n/k)$  non-zeros (in fact, 1's) in each label indicator vector  $\mathbf{v}_c$ .

**Lemma 3.** *Under the setting of Assumption 1, there exist large constants  $C_1, C_2 > 0$  such that the event*

$$\mathcal{E}_v := \left\{ \left(1 - \frac{1}{C_1}\right) \frac{n}{k} \leq \|\mathbf{v}_c\|_2^2 \leq \left(1 + \frac{1}{C_1}\right) \frac{n}{k}, \forall c \in [k] \right\}, \quad (37)$$

*holds with probability at least  $1 - 2k e^{-\frac{n}{C_2 k^2}}$ .*

Next, we provide bounds on the “base case” 0-th order quadratic forms that involve the Gram matrix  $\mathbf{A}_0^{-1}$ . We do this in three lemmas presented below. The first Lemma 4 follows by a direct application of [WT21, Lemma 4 and 5], the only difference being the scalings of  $\mathcal{O}(1/k)$  arising from the multiclass case in the  $\mathbf{v}_j$ 's. The other two Lemmas 5 and 6 are proved in Section C.5.

**Lemma 4** (0-th order Quadratic forms, Part I). *Under the event  $\mathcal{E}_v$ , there exist constants  $c_i$ 's and  $C_i$ 's  $> 1$  such that the following bounds hold with probability at least  $1 - c_1 k e^{-\frac{n}{c_2}}$ .*

$$\begin{aligned} t_{jj}^{(0)} &\leq \frac{C_1 n \|\boldsymbol{\mu}\|_2^2}{p} \text{ for all } j \in [k], \\ |h_{mj}^{(0)}| &\leq \frac{C_2 n \|\boldsymbol{\mu}\|_2}{\sqrt{kp}} \text{ for all } m, j \in [k], \\ |t_{mj}^{(0)}| &\leq \frac{C_3 n \|\boldsymbol{\mu}\|_2^2}{p} \text{ for all } m \neq j \in [k], \\ \|\mathbf{d}_j\|_2^2 &\leq C_4 n \|\boldsymbol{\mu}\|_2^2 \text{ for all } j \in [k], \\ \max_{i \in [n]} |f_{ji}^{(0)}| &\leq \frac{C_5 \sqrt{\log(2n)} \|\boldsymbol{\mu}\|_2}{p} \text{ for all } j \in [k]. \end{aligned}$$

To sharply characterize the forms  $s_{ij}^{(0)}$  we need additional work, particularly for the cross-terms where  $i \neq j$ . We will make use of fundamental concentration inequalities on quadratic forms of inverse Wishart matrices. The following lemma controls these quadratic forms, and shows in particular that the  $s_{ij}^{(0)}$  terms for  $i \neq j$  are much smaller than the corresponding terms  $s_{jj}^{(0)}$ . This sharp control of the cross-terms is essential for several subsequent proof steps.

**Lemma 5** (0-th order Quadratic forms, Part II). *Working on the event  $\mathcal{E}_v$  defined in Eqn. (37), assume that  $p > Cn \log(kn) + n - 1$  for large enough constant  $C > 1$  and large  $n$ . There exist constants  $C_i$ 's  $> 1$  such that with probability at least  $1 - \frac{C_0}{n}$ , the following bound holds:*

$$\begin{aligned} \frac{C_1 - 1}{C_1} \cdot \frac{n}{kp} \leq s_{jj}^{(0)} &\leq \frac{C_1 + 1}{C_1} \cdot \frac{n}{kp}, \text{ for } j \in [k], \\ -\frac{C_2 + 1}{C_2} \cdot \frac{\sqrt{n}}{kp} \leq s_{ij}^{(0)} &\leq \frac{C_2 + 1}{C_2} \cdot \frac{\sqrt{n}}{kp}, \text{ for } i \neq j \in [k]. \end{aligned}$$

The proof of Lemma 5 for the cross terms with  $i \neq j$  critically uses the in-built orthogonality of the label indicator vectors  $\{\mathbf{v}_c\}_{c \in [k]}$ . Finally, the following lemma controls the quadratic forms  $g_{ji}^{(0)}$ .

**Lemma 6** (0-th order Quadratic forms, Part III). *Working on the event  $\mathcal{E}_v$  defined in Eqn. (37), given  $p > Ck^3 n \log(kn) + n - 1$  for a large constant  $C$ , there exist large enough constants  $C_1, C_2$ , such that with probability at least  $1 - \frac{2}{kn}$ , we have for every  $i \in [n]$ :*

$$\begin{aligned} \left(1 - \frac{1}{C_1}\right) \frac{1}{p} \leq g_{(y_i)i}^{(0)} &\leq \left(1 + \frac{1}{C_1}\right) \frac{1}{p}, \\ -\frac{1}{C_2} \cdot \frac{1}{k^2 p} \leq g_{ji}^{(0)} &\leq \frac{1}{C_2} \cdot \frac{1}{k^2 p}, \text{ for } j \neq y_i. \end{aligned}$$

## C.4 Proof of Lemma 2

In this section, we provide the full proof of Lemma 2. We begin with a proof outline.

### C.4.1 Proof outline

It suffices to consider the case where  $j = k$ . To see this, note that when  $j \neq k$  we can simply change the order of adding mean components, described in Eqn. (29), so that the  $j$ -th mean component is added last. For concreteness, we will also fix  $i \in [n]$ ,  $y_i = k$  and  $m = k - 1$ . These fixes are without loss of generality.

For the case  $j = k$ , the leave-one-out quadratic forms in Lemma 2 are equal to the quadratic forms of order  $k - 1$ , given by  $s_{kk}^{(k-1)}, t_{kk}^{(k-1)}, h_{kk}^{(k-1)}, g_{ki}^{(k-1)}$  and  $f_{ki}^{(k-1)}$ . We will proceed recursively starting from the quadratic forms of order 1 building up all the way to the quadratic forms of order  $k - 1$ . Specifically, starting from order 1, we will work on the event

$$\mathcal{E}_q := \{\text{all the inequalities in Lemmas 4, 5 and 6 hold}\}, \quad (38)$$

Further, we note that Lemma 6 shows that the bound for  $g_{y_i}^{(0)}$  is different from the bound for  $g_{j_i}^{(0)}$  when  $j \neq y_i$ . We will show the following set of upper and lower bounds:

$$\begin{aligned}
\left(\frac{C_{11}-1}{C_{11}}\right) \frac{n}{kp} &\leq s_{kk}^{(1)} \leq \left(\frac{C_{11}+1}{C_{11}}\right) \frac{n}{kp}, \\
-\left(\frac{C_{12}+1}{C_{12}}\right) \frac{\sqrt{n}}{kp} &\leq s_{mk}^{(1)} \leq \left(\frac{C_{12}+1}{C_{12}}\right) \frac{\sqrt{n}}{kp}, \\
t_{kk}^{(1)} &\leq \frac{C_{13}n\|\boldsymbol{\mu}\|_2^2}{p}, \\
|h_{mk}^{(1)}| &\leq \frac{C_{14}n\|\boldsymbol{\mu}\|_2}{\sqrt{kp}}, \\
|t_{mk}^{(1)}| &\leq \frac{C_{15}n\|\boldsymbol{\mu}\|_2^2}{p}, \\
\|\mathbf{d}_k\|_2^2 &\leq C_{16}n\|\boldsymbol{\mu}\|_2^2, \\
|f_{ki}^{(1)}| &\leq \frac{C_{17}\sqrt{n}\|\boldsymbol{\mu}\|_2}{p}, \\
\left(1 - \frac{1}{C_{18}}\right) \frac{1}{p} &\leq g_{(y_i)i}^{(1)} \leq \left(1 + \frac{1}{C_{18}}\right) \frac{1}{p}, \text{ and} \\
-\frac{1}{C_{19}k^2p} &\leq g_{mi}^{(1)} \leq \frac{1}{C_{19}k^2p}
\end{aligned} \tag{39}$$

with probability at least  $1 - \frac{c}{kn^2}$ . Comparing the bounds on the terms of order 1 in Eqn. (39) with the terms in Lemmas 4, 5 and 6 of order 0, the key observation is that they are all at the same order. The only exception is the term  $f_{ki}^{(1)}$ , which has a higher upper bound than  $f_{ki}^{(0)}$ . For this case, the subsequent  $c$ -th order terms  $f_{ki}^{(c)}$  will be of the same order as  $f_{ki}^{(1)}$ . This allows us to repeat the same argument to now bound corresponding terms of order 2, and so on until order  $k-1$ . Note that for each  $j \in [k]$ , we have  $n$  terms of the form  $g_{ji}^{(1)}$ , corresponding to each value of  $i \in [n]$ . Thus, we will adjust the final probabilities by applying a union bound over the  $n$  training examples.

#### C.4.2 Proofs for 1-st order quadratic forms in Eqn. (39)

The proof makes repeated use of Lemmas 4, 5 and 6. In fact, we will throughout condition on the event  $\mathcal{E}_q$ , defined in Equation (38), which holds with probability at least  $1 - \frac{c_1}{n} - c_2 e^{-\frac{n}{c_0 k^2}}$ . Specifically, by Lemma 4 we have

$$h_{mj}^{(0)} \leq \frac{C_1 \epsilon}{k^2 \sqrt{n}}, \quad \max_{i \in [n]} |f_{mi}^{(0)}| \leq \frac{C_2 \epsilon}{k^{1.5} n}, \quad \text{and} \quad \frac{s_{mj}^{(0)}}{s_{kk}^{(0)}} \leq \frac{C}{\sqrt{n}} \text{ for } m, j \neq k, \tag{40}$$

where we recall from Eqn. (33) the notation  $\epsilon := \frac{k^{1.5} n^{1.5} \|\boldsymbol{\mu}\|_2}{p}$ . Also, recall that we choose  $\epsilon \leq \tau$  for a sufficiently small constant  $\tau$ . In Eqn. (40), note that we used a loose upper bound  $C\sqrt{n}\|\boldsymbol{\mu}\|_2/p$  for  $\max_{i \in [n]} |f_{mi}^{(0)}|$  compared to the bound given in Lemma 4. This looser bound will suffice for the proof of Equation (33). Moreover, it actually coincides with the bound on  $\max_{i \in [n]} |f_{mi}^{(1)}|$  given in Equation (33). This remark is important as it will allow us to use Equation (33) to bound 2-nd order quadratic forms in the same way as shown below.

In order to make use of Lemmas 4, 5 and 6, we need to relate the quantities of interest to corresponding quadratic forms involving  $\mathbf{A}_0$ . We do this recursively and make repeated use of the Woodbury identity. The recursions are proved in Appendix F.1. We now provide the proofs for the bounds on the terms in Eqn. (39) one-by-one.

**Bounds on  $s_{mk}^{(1)}$ .** By Eqn. (71) in Appendix F.1, we have

$$s_{mk}^{(1)} = s_{mk}^{(0)} - \frac{1}{\det_0} (\star)_s^{(0)}, \tag{41}$$

where we define

$$(\star)_s^{(0)} := (\|\boldsymbol{\mu}\|_2^2 - t_{11}^{(0)})s_{1k}^{(0)}s_{1m}^{(0)} + s_{1m}^{(0)}h_{k1}^{(0)}h_{11}^{(0)} + s_{1k}^{(0)}h_{m1}^{(0)}h_{11}^{(0)} - s_{11}^{(0)}h_{k1}^{(0)}h_{m1}^{(0)} + s_{1m}^{(0)}h_{k1}^{(0)} + s_{1k}^{(0)}h_{m1}^{(0)}$$

and  $\det_0 := s_{11}^{(0)}(\|\boldsymbol{\mu}\|_2^2 - t_{11}^{(0)}) + (1 + h_{11}^{(0)})^2$ . (42)

The essential idea is to show that  $|(\star)_{\det_0}^{(0)}|$  is sufficiently small compared to  $|s_{mk}^{(0)}|$ . We first look at the first term given by  $((\|\boldsymbol{\mu}\|_2^2 - t_{11}^{(0)})s_{1k}^{(0)}s_{1m}^{(0)})/\det_0$ . By Lemmas 4, 5 and the definition of  $\det_0$ , we have

$$\left| \frac{1}{\det_0} ((\|\boldsymbol{\mu}\|_2^2 - t_{11}^{(0)})s_{1k}^{(0)}s_{1m}^{(0)}) \right| \leq \frac{(\|\boldsymbol{\mu}\|_2^2 - t_{11}^{(0)})|s_{1k}^{(0)}s_{1m}^{(0)}|}{s_{11}^{(0)}(\|\boldsymbol{\mu}\|_2^2 - t_{11}^{(0)})} = \left| \frac{s_{1k}^{(0)}s_{1m}^{(0)}}{s_{11}^{(0)}} \right| \leq \frac{C_1}{\sqrt{n}} \cdot \frac{C_2 + 1}{C_2} \cdot \frac{\sqrt{n}}{kp},$$

where we use  $\det_0 \geq s_{11}^{(0)}(\|\boldsymbol{\mu}\|_2^2 - t_{11}^{(0)})$  and  $s_{mj}^{(0)}/s_{kk}^{(0)} \leq C/\sqrt{n}$  for all  $m, j \neq k$ . Now, we upper bound the other two dominant terms  $|s_{1m}^{(0)}h_{k1}^{(0)}/\det_0|$  and  $|s_{1k}^{(0)}h_{m1}^{(0)}/\det_0|$ . Note that the same bound will apply to the remaining terms in Eqn. (42) because we trivially have  $|h_{ij}^{(0)}| = \mathcal{O}(1)$  for all  $(i, j) \in [k]$ . Again, Lemmas 4 and 5 give us

$$\left| \frac{s_{1m}^{(0)}h_{k1}^{(0)}}{\det_0} \right| \leq \frac{|s_{1m}^{(0)}h_{k1}^{(0)}|}{(1 + h_{11}^{(0)})^2} \leq \frac{C_3\epsilon}{\left(1 - \frac{C_5\epsilon}{k^2\sqrt{n}}\right)^2 k^2\sqrt{n}} \cdot \frac{C_2 + 1}{C_2} \cdot \frac{\sqrt{n}}{kp}.$$

The identical bound holds for  $|s_{1k}^{(0)}h_{m1}^{(0)}|$ . Noting that  $|s_{mk}^{(0)}| \leq \frac{C_2+1}{C_2} \cdot \frac{\sqrt{n}}{kp}$ , we then have

$$\begin{aligned} |s_{mk}^{(1)}| &\leq |s_{mk}^{(0)}| + \left| \frac{(\star)_s^{(0)}}{\det_0} \right| \\ &\leq \left( 1 + \frac{C_6}{\sqrt{n}} + \frac{C_7\epsilon}{\left(1 - \frac{C_5\epsilon}{k^2\sqrt{n}}\right)^2 k^2\sqrt{n}} \right) \frac{C_2 + 1}{C_2} \cdot \frac{\sqrt{n}}{kp} \\ &\leq (1 + \alpha) \cdot \frac{C_2 + 1}{C_2} \cdot \frac{\sqrt{n}}{kp}, \end{aligned} \quad (43)$$

where in the last inequality, we use that  $\epsilon \leq \tau$  for sufficiently small constant  $\tau > 0$ , and defined

$$\alpha := \frac{C_6}{\sqrt{n}} + \frac{C_7\tau}{\left(1 - \frac{C_5\tau}{k^2\sqrt{n}}\right)^2 k^2\sqrt{n}}.$$

Now, we pick  $\tau$  to be sufficiently small and  $n$  to be sufficiently large such that  $(1 + \alpha)\frac{C_2+1}{C_2} \leq \frac{C_8+1}{C_8}$  for some constant  $C_8 > 0$ . Then, we conclude with the following upper bound:

$$|s_{mk}^{(1)}| \leq \frac{C_8 + 1}{C_8} \cdot \frac{\sqrt{n}}{kp}.$$

**Bounds on  $s_{kk}^{(1)}$ .** Eqn. (72) in Appendix F.1 gives us

$$s_{kk}^{(1)} = s_{kk}^{(0)} - \frac{1}{\det_0} \left( (\|\boldsymbol{\mu}\|_2^2 - t_{11}^{(0)})s_{1k}^{(0)2} + 2s_{1k}^{(0)}h_{k1}^{(0)}h_{11}^{(0)} - s_{11}^{(0)}h_{k1}^{(0)2} + 2s_{1k}^{(0)}h_{k1}^{(0)} \right).$$

First, we lower bound  $s_{kk}^{(1)}$  by upper bounding  $\frac{1}{\det_0} \left( (\|\boldsymbol{\mu}\|_2^2 - t_{11}^{(0)})s_{1k}^{(0)2} \right)$ . Lemmas 4 and 5 yield

$$\frac{1}{\det_0} \left( (\|\boldsymbol{\mu}\|_2^2 - t_{11}^{(0)})s_{1k}^{(0)2} \right) \leq \frac{(\|\boldsymbol{\mu}\|_2^2 - t_{11}^{(0)})s_{1k}^{(0)2}}{s_{11}^{(0)}(\|\boldsymbol{\mu}\|_2^2 - t_{11}^{(0)}) + (1 + h_{11}^{(0)})^2} \leq \frac{(\|\boldsymbol{\mu}\|_2^2 - t_{11}^{(0)})s_{1k}^{(0)2}}{s_{11}^{(0)}(\|\boldsymbol{\mu}\|_2^2 - t_{11}^{(0)})} \leq \frac{C_1}{n} \cdot \frac{n}{kp}.$$

It suffices to upper bound the other dominant term  $|s_{1k}^{(0)}h_{k1}^{(0)}|/\det_0$ . For this term, we have

$$\left| \frac{s_{1k}^{(0)}h_{k1}^{(0)}}{\det_0} \right| \leq \frac{|s_{1k}^{(0)}h_{k1}^{(0)}|}{(1 + h_{11}^{(0)})^2} \leq \frac{C_3\epsilon}{\left(1 - \frac{C_4\epsilon}{k^2\sqrt{n}}\right)^2 k^2\sqrt{n}} \cdot \frac{C_2 + 1}{C_2} \cdot \frac{\sqrt{n}}{kp}.$$

Thus, we get

$$s_{kk}^{(1)} \geq \left(1 - \frac{C_1}{n} - \frac{C_5\epsilon}{\left(1 - \frac{C_4\epsilon}{k^2\sqrt{n}}\right)^2 k^2\sqrt{n}}\right) \frac{C_6 - 1}{C_6} \cdot \frac{n}{kp} \geq (1 - \alpha) \cdot \frac{C_6 - 1}{C_6} \cdot \frac{n}{kp}.$$

Next, we upper bound  $s_{kk}^{(1)}$  by a similar argument, and get

$$\begin{aligned} s_{kk}^{(1)} &\leq |s_{kk}^{(0)}| + \frac{1}{\det_0} \left| 2s_{1k}^{(0)}h_{k1}^{(0)}h_{11}^{(0)} + s_{11}^{(0)}h_{k1}^{(0)^2} + 2s_{1k}^{(0)}h_{k1}^{(0)} \right| \\ &\leq \left(1 + \frac{C_7\epsilon}{\left(1 - \frac{C_4\epsilon}{k^2\sqrt{n}}\right)^2 k^2\sqrt{n}}\right) \frac{C_8 + 1}{C_8} \cdot \frac{n}{kp} \leq (1 + \alpha') \frac{C_8 + 1}{C_8} \cdot \frac{n}{kp}, \end{aligned}$$

where we used  $\frac{1}{\det_0} \left( (\|\boldsymbol{\mu}\|_2^2 - t_{11}^{(0)})s_{1k}^{(0)^2} \right) > 0$  in the first step. As above, we can tune  $\epsilon$  and  $n$  such that  $(1 + \alpha') \frac{C_8 + 1}{C_8} \leq \frac{C_9 + 1}{C_9}$  and  $(1 - \alpha) \frac{C_6 - 1}{C_6} \geq \frac{C_9 - 1}{C_9}$  for sufficiently large constant  $C_9 > 0$ .

**Bounds on  $h_{mk}^{(1)}$ .** Eqn. (73) in Appendix F.1 gives us

$$h_{mk}^{(1)} = h_{mk}^{(0)} - \frac{1}{\det_0} (\star)_h^{(0)},$$

where we define

$$(\star)_h^{(0)} = (\|\boldsymbol{\mu}\|_2^2 - t_{11}^{(0)})s_{1m}^{(0)}h_{1k}^{(0)} + h_{m1}^{(0)}h_{1k}^{(0)}h_{11}^{(0)} + h_{m1}^{(0)}h_{1k}^{(0)} + s_{1m}^{(0)}t_{k1}^{(0)} + s_{1m}^{(0)}t_{k1}^{(0)}h_{11}^{(0)} - s_{11}^{(0)}t_{k1}^{(0)}h_{m1}^{(0)}.$$

We focus on the two dominant terms  $((\|\boldsymbol{\mu}\|_2^2 - t_{11}^{(0)})s_{1m}^{(0)}h_{1k}^{(0)})/\det_0$  and  $s_{1m}^{(0)}t_{k1}^{(0)}/\det_0$ . For the first dominant term  $((\|\boldsymbol{\mu}\|_2^2 - t_{11}^{(0)})s_{1m}^{(0)}h_{1k}^{(0)})/\det_0$ , Lemmas 4 and 5 yield

$$\left| \frac{1}{\det_0} \left( (\|\boldsymbol{\mu}\|_2^2 - t_{11}^{(0)})s_{1m}^{(0)}h_{1k}^{(0)} \right) \right| \leq \frac{(\|\boldsymbol{\mu}\|_2^2 - t_{11}^{(0)})|s_{1m}^{(0)}h_{1k}^{(0)}|}{s_{11}^{(0)}(\|\boldsymbol{\mu}\|_2^2 - t_{11}^{(0)})} \leq \left| \frac{s_{1m}^{(0)}h_{1k}^{(0)}}{s_{11}^{(0)}} \right| \leq \frac{C_1}{\sqrt{n}} |h_{1k}^{(0)}| \leq \frac{C_2\epsilon}{k^2n}.$$

For the second dominant term  $s_{1m}^{(0)}t_{k1}^{(0)}/\det_0$ , we have

$$\frac{1}{\det_0} s_{1m}^{(0)}t_{k1}^{(0)} \leq \frac{|s_{1m}^{(0)}t_{k1}^{(0)}|}{(1 + h_{11}^{(0)})^2} \leq \frac{C_3n\sqrt{n}\|\boldsymbol{\mu}\|_2^2}{\left(1 - \frac{C_4\epsilon}{k^2\sqrt{n}}\right)^2 kp^2} \leq \frac{C_5\epsilon}{\left(1 - \frac{C_4\epsilon}{k^2\sqrt{n}}\right)^2 k^2n} \cdot \frac{\epsilon}{k^2\sqrt{n}}.$$

Thus, we get

$$|h_{mk}^{(1)}| \leq |h_{mk}^{(0)}| + \left| \frac{1}{\det_0} (\star)_h^{(0)} \right| \leq \left(1 + \frac{C_1}{\sqrt{n}} + \frac{C_5\epsilon}{\left(1 - \frac{C_4\epsilon}{k^2\sqrt{n}}\right)^2 k^2n}\right) \frac{C_6\epsilon}{k^2\sqrt{n}} \leq (1 + \alpha) \frac{C_7\epsilon}{k^2\sqrt{n}},$$

and there exists constant  $C_8$  such that  $(1 + \alpha)C_7 \leq C_8$ , which shows the desired upper bound.

**Bounds on  $t_{kk}^{(1)}$ .** Eqn. (75) in Appendix F.1 gives us

$$t_{kk}^{(1)} = t_{kk}^{(0)} - \frac{1}{\det_0} \left( (\|\boldsymbol{\mu}\|_2^2 - t_{11}^{(0)})h_{1k}^{(0)^2} + 2t_{1k}^{(0)}h_{1k}^{(0)}h_{11}^{(0)} - s_{11}^{(0)}t_{1k}^{(0)^2} + 2t_{1k}^{(0)}h_{1k}^{(0)} \right).$$

We only need an upper bound on  $t_{kk}^{(1)}$ . The first dominant term  $s_{11}^{(0)}t_{1k}^{(0)^2}/\det_0$  is upper bounded as follows:

$$\frac{s_{11}^{(0)}t_{1k}^{(0)^2}}{\det_0} \leq \frac{s_{11}^{(0)}t_{1k}^{(0)^2}}{(1 + h_{11}^{(0)})^2} \leq \frac{C_6n^3\|\boldsymbol{\mu}\|_2^4}{\left(1 - \frac{C_3\epsilon}{k^2\sqrt{n}}\right)^2 kp^3} \leq \frac{C_7\epsilon^2}{\left(1 - \frac{C_3\epsilon}{k^2\sqrt{n}}\right)^2 pk^4n} \cdot \frac{n\|\boldsymbol{\mu}\|_2^2}{p}.$$

Next, the second dominant term,  $t_{1k}^{(0)} h_{1k}^{(0)} / \det_0$ , is upper bounded as

$$\frac{t_{1k}^{(0)} h_{1k}^{(0)}}{\det_0} \leq \frac{|t_{1k}^{(0)} h_{1k}^{(0)}|}{(1 + h_{11}^{(0)})^2} \leq \frac{C_8 \epsilon}{k^2 n \left(1 - \frac{C_3 \epsilon}{k^2 \sqrt{n}}\right)^2} \cdot \frac{n \|\boldsymbol{\mu}\|_2^2}{p}.$$

Combining the results above gives us

$$\begin{aligned} t_{kk}^{(1)} &\leq t_{kk}^{(0)} + \frac{1}{\det_0} \left| 2t_{1k}^{(0)} h_{1k}^{(0)} h_{11}^{(0)} + s_{11}^{(0)} t_{1k}^{(0)^2} + 2t_{1k}^{(0)} h_{1k}^{(0)} \right| \\ &\leq \left( 1 + \frac{C_9 \epsilon}{\left(1 - \frac{C_3 \epsilon}{k^2 \sqrt{n}}\right)^2 k^2 \sqrt{n}} \right) \frac{n \|\boldsymbol{\mu}\|_2^2}{p} \leq \frac{C_5 n \|\boldsymbol{\mu}\|_2^2}{p}. \end{aligned}$$

This shows the desired upper bound.

**Bounds on  $t_{mk}^{(1)}$ .** Eqn. (74) in Appendix F.1 gives us

$$t_{mk}^{(1)} = t_{mk}^{(0)} - \frac{1}{\det_0} (\star)_t^{(0)},$$

where we define

$$(\star)_t^{(0)} = (\|\boldsymbol{\mu}\|_2^2 - t_{11}^{(0)}) h_{1m}^{(0)} h_{1k}^{(0)} + t_{m1}^{(0)} h_{1k}^{(0)} h_{11}^{(0)} + t_{k1}^{(0)} h_{1m}^{(0)} h_{11}^{(0)} + t_{1m}^{(0)} h_{1k}^{(0)} + t_{1k}^{(0)} h_{1m}^{(0)} - s_{11}^{(0)} t_{1m}^{(0)} t_{1k}^{(0)}.$$

Again, we only need an upper bound on  $t_{mk}^{(1)}$ . As in the previously derived bounds, we have

$$\frac{1}{\det_0} (\|\boldsymbol{\mu}\|_2^2 - t_{11}^{(0)}) h_{1m}^{(0)} h_{1k}^{(0)} \leq \frac{(\|\boldsymbol{\mu}\|_2^2 - t_{11}^{(0)}) |h_{1m}^{(0)} h_{1k}^{(0)}|}{s_{11}^{(0)} (\|\boldsymbol{\mu}\|_2^2 - t_{11}^{(0)})} \leq \frac{C_1 n^2 \|\boldsymbol{\mu}\|_2^2}{k p^2} \cdot \frac{k p}{n} \leq \frac{C_1 n \|\boldsymbol{\mu}\|_2^2}{p}.$$

The other dominant term  $t_{1m}^{(0)} h_{1m}^{(0)} / \det_0$  is upper bounded as:

$$\frac{t_{1m}^{(0)} h_{1m}^{(0)}}{\det_0} \leq \frac{|t_{1m}^{(0)} h_{1m}^{(0)}|}{(1 + h_{11}^{(0)})^2} \leq \frac{C_2 \epsilon}{k^2 \sqrt{n} \left(1 - \frac{C_3 \epsilon}{k^2 \sqrt{n}}\right)^2} \cdot \frac{n \|\boldsymbol{\mu}\|_2^2}{p}.$$

Combining the results above yields

$$\begin{aligned} |t_{mk}^{(1)}| &\leq |t_{mk}^{(0)}| + \frac{1}{\det_0} |(\star)_t^{(0)}| \\ &\leq \left( C_1 + \frac{C_2 \epsilon}{\left(1 - \frac{C_3 \epsilon}{k^2 \sqrt{n}}\right)^2 k^2 \sqrt{n}} \right) \frac{n \|\boldsymbol{\mu}\|_2^2}{p} \leq \frac{C_4 n \|\boldsymbol{\mu}\|_2^2}{p}. \end{aligned}$$

Note that both  $t_{kk}^{(0)}$  and  $t_{mk}^{(0)}$  are much smaller than  $\|\boldsymbol{\mu}\|_2^2$ . The above upper bound shows that this continues to hold for  $t_{kk}^{(1)}$  and  $t_{mk}^{(1)}$  since  $p \gg n$ .

**Bounds on  $f_{ki}^{(1)}$ .** Consider  $i \in [n]$  and fix  $y_i = k$  without loss of generality. Eqn. (76) in Appendix F.1 gives us

$$f_{ki}^{(1)} = f_{ki}^{(0)} - \frac{1}{\det_0} (\star)_f^{(0)}, \quad (44)$$

where we define

$$(\star)_f^{(0)} = (\|\boldsymbol{\mu}\|_2^2 - t_{11}^{(0)}) h_{1k}^{(0)} g_{1i}^{(0)} + t_{1k}^{(0)} g_{1i}^{(0)} + t_{1k}^{(0)} h_{11}^{(0)} g_{1i}^{(0)} + h_{1k}^{(0)} f_{1i}^{(0)} + h_{1k}^{(0)} h_{11}^{(0)} f_{1i}^{(0)} - s_{11}^{(0)} t_{1k}^{(0)} f_{1i}^{(0)}. \quad (45)$$

We only need an upper bound on  $f_{ki}^{(1)}$ . We consider the dominant terms  $(\|\boldsymbol{\mu}\|_2^2 - t_{11}^{(0)})h_{1k}^{(0)}g_{1i}^{(0)}/\det_0$ ,  $t_{1k}^{(0)}g_{1i}^{(0)}/\det_0$ ,  $h_{1k}^{(0)}f_{1i}^{(0)}/\det_0$  and  $s_{11}^{(0)}t_{1k}^{(0)}f_{1i}^{(0)}/\det_0$ . Lemmas 4, 5 and 6 give us

$$\begin{aligned}\frac{(\|\boldsymbol{\mu}\|_2^2 - t_{11}^{(0)})h_{1k}^{(0)}g_{1i}^{(0)}}{\det_0} &\leq \frac{(\|\boldsymbol{\mu}\|_2^2 - t_{11}^{(0)})|h_{1k}^{(0)}g_{1i}^{(0)}|}{(\|\boldsymbol{\mu}\|_2^2 - t_{11}^{(0)})s_{11}^{(0)}} \leq \frac{C_1n\|\boldsymbol{\mu}\|_2}{\sqrt{kp}} \cdot \frac{1}{C_2k^2p} \cdot \frac{kp}{n} \leq \frac{C_3}{k^{1.5}\sqrt{n}} \cdot \frac{\sqrt{n}\|\boldsymbol{\mu}\|_2}{p}, \\ \frac{t_{1k}^{(0)}g_{1i}^{(0)}}{\det_0} &\leq \frac{|t_{1k}^{(0)}g_{1i}^{(0)}|}{(1+h_{11}^{(0)})^2} \leq \frac{C_4n\|\boldsymbol{\mu}\|_2^2}{\left(1 - \frac{C_5\epsilon}{k^2\sqrt{n}}\right)^2 k^2 p^2} \leq \frac{C_7\epsilon}{\left(1 - \frac{C_5\epsilon}{k^2\sqrt{n}}\right)^2 k^{3.5}n} \cdot \frac{\sqrt{n}\|\boldsymbol{\mu}\|_2}{p}, \\ \frac{h_{1k}^{(0)}f_{1i}^{(0)}}{\det_0} &\leq \frac{|h_{1k}^{(0)}f_{1i}^{(0)}|}{(1+h_{11}^{(0)})^2} \leq \frac{C_6\epsilon}{\left(1 - \frac{C_5\epsilon}{k^2\sqrt{n}}\right)^2 k^2\sqrt{n}} \cdot \frac{\sqrt{n}\|\boldsymbol{\mu}\|_2}{p}, \text{ and} \\ \frac{s_{11}^{(0)}t_{1k}^{(0)}f_{1i}^{(0)}}{\det_0} &\leq \frac{|s_{11}^{(0)}t_{1k}^{(0)}f_{1i}^{(0)}|}{(1+h_{11}^{(0)})^2} \leq \frac{C_7\epsilon^2}{k^4n\left(1 - \frac{C_5\epsilon}{k^2\sqrt{n}}\right)^2} \cdot \frac{\sqrt{n}\|\boldsymbol{\mu}\|_2}{p},\end{aligned}$$

where, in the last two steps, we used the (loose) upper bound  $C\sqrt{n}\|\boldsymbol{\mu}\|_2/p$  for  $|f_{ji}^{(0)}|$  and previously derived bounds on  $|h_{1k}^{(0)}|$  and  $|s_{11}^{(0)}t_{1k}^{(0)}|$ . Thus, we have

$$\begin{aligned}|f_{ki}^{(1)}| &\leq |f_{ki}^{(0)}| + \left| \frac{1}{\det_0} (\star)_f^{(0)} \right| \\ &\leq \left( 1 + \frac{C_3}{k^{1.5}\sqrt{n}} + \frac{C_8\epsilon}{\left(1 - \frac{C_5\epsilon}{k^2\sqrt{n}}\right)^2 k^2\sqrt{n}} \right) \frac{C_9\sqrt{n}\|\boldsymbol{\mu}\|_2}{p} \\ &\leq (1+\alpha) \frac{C_{10}\epsilon}{k^{1.5}n},\end{aligned}$$

and we have  $(1+\alpha)C_{10} \leq C_{11}$  for a large enough positive constant  $C_{11}$ . This shows the desired upper bound.

**Bounds on  $g_{ki}^{(1)}$  and  $g_{mi}^{(1)}$ .** Eqn. (77) in Appendix F.1 gives

$$z_{ci}\mathbf{e}_i^T \mathbf{A}_1^{-1} \mathbf{u}_k = |z_{ci}|^2 \left( \mathbf{e}_i^T \mathbf{A}_0^{-1} \mathbf{v}_k - \frac{1}{\det_0} (\star)_{gk}^{(0)} \right) = |z_{ci}|^2 \left( g_{ki}^{(0)} - \frac{1}{\det_0} (\star)_{gk}^{(0)} \right), \quad (46)$$

where we define

$$(\star)_{gk}^{(0)} = (\|\boldsymbol{\mu}\|_2^2 - t_{11}^{(0)})s_{1k}^{(0)}g_{1i}^{(0)} + g_{1i}^{(0)}h_{11}^{(0)}h_{k1}^{(0)} + g_{1i}^{(0)}h_{k1}^{(0)} + s_{1k}^{(0)}f_{1i}^{(0)} + s_{1k}^{(0)}h_{11}^{(0)}f_{1i}^{(0)} - s_{11}^{(0)}h_{k1}^{(0)}f_{1i}^{(0)}.$$

Lemmas 4, 5 and 6 give us

$$\begin{aligned}\frac{(\|\boldsymbol{\mu}\|_2^2 - t_{11}^{(0)})|s_{1k}^{(0)}g_{1i}^{(0)}|}{\det_0} &\leq \frac{(\|\boldsymbol{\mu}\|_2^2 - t_{11}^{(0)})|s_{1k}^{(0)}g_{1i}^{(0)}|}{(\|\boldsymbol{\mu}\|_2^2 - t_{11}^{(0)})s_{11}^{(0)}} \leq \frac{C_1}{\sqrt{n}} \cdot \frac{1}{C_2k^2p}, \\ \frac{|h_{k1}^{(0)}g_{1i}^{(0)}|}{\det_0} &\leq \frac{|h_{k1}^{(0)}g_{1i}^{(0)}|}{(1+h_{11}^{(0)})^2} \leq \frac{C_3\epsilon}{\left(1 - \frac{C_4\epsilon}{k^2\sqrt{n}}\right)^2 k^2\sqrt{n}} \cdot \frac{1}{C_2k^2p}, \text{ and} \\ \frac{|s_{1k}^{(0)}f_{1i}^{(0)}|}{\det_0} &\leq \frac{|s_{1k}^{(0)}f_{1i}^{(0)}|}{(1+h_{11}^{(0)})^2} \leq \frac{C_5\epsilon}{\left(1 - \frac{C_4\epsilon}{k^2\sqrt{n}}\right)^2 \sqrt{k}\sqrt{n}} \cdot \frac{1}{C_2k^2p}.\end{aligned}$$

We then have

$$\begin{aligned}g_{ki}^{(1)} &\geq g_{ki}^{(0)} - \frac{1}{\det_0} |(\star)_{gk}^{(0)}| \geq \left(1 - \frac{1}{C}\right) \left(1 - \frac{C_1}{k^2\sqrt{n}} - \frac{C_6\epsilon}{\left(1 - \frac{C_4\epsilon}{k^2\sqrt{n}}\right)^2 k^{2.5}\sqrt{n}}\right) \frac{1}{p} \geq \left(1 - \frac{1}{C}\right) \frac{1-\alpha}{p} \\ g_{ki}^{(1)} &\leq g_{ki}^{(0)} + \frac{1}{\det_0} |(\star)_{gk}^{(0)}| \leq \left(1 + \frac{1}{C}\right) \left(1 + \frac{C_1}{k^2\sqrt{n}} + \frac{C_7\epsilon}{\left(1 - \frac{C_4\epsilon}{k^2\sqrt{n}}\right)^2 k^{2.5}\sqrt{n}}\right) \frac{1}{p} \leq \left(1 + \frac{1}{C}\right) \frac{1+\alpha}{p},\end{aligned}$$

where for large enough  $n$  and positive constant  $C_9$ , we have  $(1 + \alpha) \frac{C+1}{C} \leq \frac{C_9+1}{C_9}$  and  $(1 - \alpha) \frac{C-1}{C} \geq \frac{C_9-1}{C_9}$ . Similarly, for the case  $m \neq k$ , we have

$$z_{ci} \mathbf{e}_i^T \mathbf{A}_1^{-1} \mathbf{u}_m = |z_{ci}|^2 \left( \mathbf{e}_i^T \mathbf{A}_0^{-1} \mathbf{v}_m - \frac{1}{\det_0} (\star)_{gm}^{(0)} \right) = |z_{ci}|^2 \left( g_{mi}^{(0)} - \frac{1}{\det_0} (\star)_{gm}^{(0)} \right), \quad (47)$$

where we define

$$(\star)_{gm}^{(0)} = (\|\boldsymbol{\mu}\|_2^2 - t_{11}^{(0)}) s_{1m}^{(0)} g_{1i}^{(0)} + g_{1i}^{(0)} h_{11}^{(0)} h_{m1}^{(0)} + g_{1i}^{(0)} h_{m1}^{(0)} + s_{1m}^{(0)} f_{1i}^{(0)} + s_{1m}^{(0)} h_{11}^{(0)} f_{1i}^{(0)} - s_{11}^{(0)} h_{m1}^{(0)} f_{1i}^{(0)}.$$

As a consequence of our equal energy and priors assumption (Assumption 1), we can directly use the bounds of the terms in  $(\star)_{gk}^{(0)}$  to bound terms in  $(\star)_{gm}^{(0)}$ . We get

$$|g_{mi}^{(1)}| \leq \frac{1}{C} \left( 1 + \frac{C_1}{\sqrt{n}} + \frac{C_8 \epsilon}{(1 - (C_4 \epsilon / (k^2 \sqrt{n})))^2 \sqrt{k} \sqrt{n}} \right) \frac{1}{k^2 p} \leq \frac{1}{C} \cdot \frac{1 + \alpha}{k^2 p}.$$

Finally, there exists a sufficiently large constant  $C_{10}$  such that  $(1 + \alpha)/C \leq 1/C_{10}$ . This shows the desired bounds.

### C.4.3 Completing the proof for k-th order quadratic forms

Notice from the above analysis that the 1-st order quadratic forms exhibit the same order-wise dependence on  $n, k$  and  $p$  as the 0-th order quadratic forms, e.g. both  $s_{mk}^{(0)}$  and  $s_{mk}^{(1)}$  are of order  $\Theta(\frac{\sqrt{n}}{kp})$ . Thus, the higher-order quadratic forms that arise by including more mean components will not change too much<sup>5</sup>. By Eqn. (29), we can see that we can bound the 2-nd order quadratic forms by bounding quadratic forms with order 1. We consider  $s_{mk}^{(2)}$  as an example:

$$s_{mk}^{(2)} = s_{mk}^{(1)} - \frac{1}{\det_1} (\star)_s^{(1)},$$

where

$$(\star)_s^{(1)} := (\|\boldsymbol{\mu}\|_2^2 - t_{22}^{(1)}) s_{2k}^{(1)} s_{2m}^{(1)} + s_{2m}^{(1)} h_{k2}^{(1)} h_{22}^{(1)} + s_{2k}^{(1)} h_{m2}^{(1)} h_{22}^{(1)} - s_{22}^{(1)} h_{k2}^{(1)} h_{m2}^{(1)} + s_{2m}^{(1)} h_{k2}^{(1)} + s_{2k}^{(1)} h_{m2}^{(1)},$$

$$\det_1 := s_{22}^{(1)} (\|\boldsymbol{\mu}\|_2^2 - t_{22}^{(1)}) + (1 + h_{22}^{(1)})^2.$$

We additionally show how  $f_{ki}^{(2)}$  relates to the 1-st order quadratic forms:

$$f_{ki}^{(2)} = f_{ki}^{(1)} - \frac{1}{\det_1} (\star)_f^{(1)},$$

where we define

$$(\star)_f^{(1)} = (\|\boldsymbol{\mu}\|_2^2 - t_{22}^{(1)}) h_{2k}^{(1)} g_{2i}^{(1)} + t_{2k}^{(1)} g_{2i}^{(1)} + t_{2k}^{(1)} h_{22}^{(1)} g_{2i}^{(1)} + h_{2k}^{(1)} f_{2i}^{(1)} + h_{2k}^{(1)} h_{22}^{(1)} f_{2i}^{(1)} - s_{22}^{(1)} t_{2k}^{(1)} f_{2i}^{(1)}.$$

Observe that the equations above are very similar to Equations (41) and (42) (for  $s$ ), and Equations (44) and (45) (for  $f$ ), except that the quadratic forms are in terms of Gram matrix  $\mathbf{A}_1$ . We have shown that the quadratic forms with order 1 will not be drastically different from the quadratic forms with order 0. Hence, we repeat the above procedures of bounding these quadratic forms  $k - 1$  times to obtain the desired bounds in Lemma 2. The only quantity that will change in each iteration is  $\alpha$ , which nevertheless remains negligible<sup>6</sup>.

Our analysis so far is conditioned on event  $\mathcal{E}_q$ . We define the *unconditional* event  $\mathcal{E}_u := \{\text{all the inequalities in Lemma 2 hold}\}$ . Then, we have

$$\begin{aligned} \mathbb{P}(\mathcal{E}_u^c) &\leq \mathbb{P}(\mathcal{E}_u^c | \mathcal{E}_q) + \mathbb{P}(\mathcal{E}_q^c) \leq \mathbb{P}(\mathcal{E}_u^c | \mathcal{E}_q) + \mathbb{P}(\mathcal{E}_q^c | \mathcal{E}_v) + \mathbb{P}(\mathcal{E}_v^c) \\ &\leq \frac{c_1}{kn} + \frac{c_2}{n} + c_3 k (e^{-\frac{n}{c_4}} + e^{-\frac{n}{c_5 k^2}}) \\ &\leq \frac{c_6}{n} + c_7 k e^{-\frac{n}{c_5 k^2}}, \end{aligned}$$

for constants  $c_i$ 's  $> 1$ . This completes the proof.

<sup>5</sup>There are several low-level reasons for this. One critical reason is the aforementioned orthogonality of the label indicator vectors  $\{\mathbf{v}_c\}_{c \in [k]}$ , which ensures by Lemma 5 that the cross-terms  $|s_{mk}^{(j)}|$  are always dominated by the larger terms  $|s_{kk}^{(j)}|$ . Another reason is that  $h_{mk}^{(0)}$ , which can be seen as the “noise” term in our analysis, is small and thus does not affect other terms.

<sup>6</sup>To see this, recall that in the first iteration we had  $\alpha_1 := \alpha = \frac{C_1}{\sqrt{n}} + \frac{C_2 \tau}{(1 - (C_5 \tau / (k^2 \sqrt{n})))^2 k^2 \sqrt{n}}$  for the first-order terms. Thus, even if we repeat the procedure  $k - 1$  times, then we have  $\alpha_k \leq C k \alpha_1$ , which remains small since we consider  $n \gg k$ .

## C.5 Proofs of Auxiliary lemmas

We complete this section by proving the auxiliary Lemmas 3, 5 and 6, which were used in the proof of Lemma 2.

### C.5.1 Proof of Lemma 3

Our goal is to upper and lower bound  $\|\mathbf{v}_c\|_2^2$ , for  $c \in [k]$ . Note that every entry of  $\mathbf{v}_c$  is either 1 or 0, hence these entries are independent sub-Gaussian random variables with sub-Gaussian parameter 1 [Wai19, Chapter 2]. Under the equal-prior Assumption 1, we have  $\mathbb{E}[\|\mathbf{v}_c\|_2^2] = n/k$  when we assume equal priors. Thus, a straightforward application of Hoeffding's concentration inequality on bounded random variables [Wai19, Chapter 2] gives us

$$\mathbb{P}\left(\left|\|\mathbf{v}_c\|_2^2 - \frac{n}{k}\right| \geq t\right) \leq 2 \exp\left(-\frac{t^2}{2n}\right).$$

We complete the proof by setting  $t = \frac{n}{C_1 k}$  for a large enough constant  $C_1$  and applying the union bound over all  $c \in [k]$ .

### C.5.2 Proof of Lemma 5

We use the following lemma adapted from [MNS<sup>+</sup>20, Lemma 2] to bound quadratic forms of inverse Wishart matrices.

**Lemma 7.** *Define  $p'(n) := (p - n + 1)$ , and consider matrix  $\mathbf{M} \sim \text{Wishart}(p, \mathbf{I}_n)$ . For any unit Euclidean norm vector  $\mathbf{v}$  and any  $t > 0$ , we have*

$$\mathbb{P}\left(\frac{1}{\mathbf{v}^T \mathbf{M}^{-1} \mathbf{v}} > p'(n) + \sqrt{2tp'(n)} + 2t\right) \leq e^{-t} \quad \text{and} \quad \mathbb{P}\left(\frac{1}{\mathbf{v}^T \mathbf{M}^{-1} \mathbf{v}} < p'(n) - \sqrt{2tp'(n)}\right) \leq e^{-t},$$

provided that  $p'(n) > 2 \max\{t, 1\}$ .

We first upper and lower bound  $s_{cc}^{(0)}$  for a fixed  $c \in [k]$ . Recall that we assume  $p > Cn \log(kn) + n - 1$  for sufficiently large constant  $C > 1$  and this can be obtained by assuming  $p'(n) > Cn \log(kn)$ . Let  $t = 2 \log(kn)$ . Working on the event  $\mathcal{E}_v$  defined in (37), Lemma 7 gives us

$$s_{cc}^{(0)} \leq \frac{\|\mathbf{v}_c\|_2^2}{p'(n) - \sqrt{4 \log(kn)p'(n)}} \leq \frac{C_1 + 1}{C_1} \cdot \frac{n/k}{p'(n) \left(1 - \frac{2}{\sqrt{Cn}}\right)} \leq \frac{C_2 + 1}{C_2} \cdot \frac{n}{kp}$$

with probability at least  $1 - \frac{2}{k^2 n^2}$ . Here, the last inequality comes from the fact that  $p$  is sufficiently large compared to  $n$  and  $C$  is large enough. Similarly, for the lower bound, we have

$$s_{cc}^{(0)} \geq \frac{\|\mathbf{v}_c\|_2^2}{p'(n) + \sqrt{4 \log(kn)p'(n)} + 2 \log(kn)} \geq \frac{C_1 - 1}{C_1} \cdot \frac{n/k}{p'(n) \left(1 + \frac{4}{\sqrt{Cn}}\right)} \geq \frac{C_2 - 1}{C_2} \cdot \frac{n}{kp}$$

with probability  $1 - \frac{2}{k^2 n^2}$ .

Now we upper and lower bound  $s_{cj}^{(0)}$  for a fixed choice  $j \neq c \in [k]$ . We use the parallelogram law to get

$$\mathbf{v}_c^T \mathbf{A}_0^{-1} \mathbf{v}_j = \frac{1}{4} \left( (\mathbf{v}_c + \mathbf{v}_j)^T \mathbf{A}_0^{-1} (\mathbf{v}_c + \mathbf{v}_j) - (\mathbf{v}_c - \mathbf{v}_j)^T \mathbf{A}_0^{-1} (\mathbf{v}_c - \mathbf{v}_j) \right).$$

Because of the orthogonality of the label indicator vectors ( $\mathbf{v}_c^T \mathbf{v}_j = 0$  for any  $j \neq c$ ), we have  $\|\mathbf{v}_c + \mathbf{v}_j\|_2^2 = \|\mathbf{v}_c - \mathbf{v}_j\|_2^2$ , which we denote by  $\tilde{n}$  as shorthand. Then, we have

$$\begin{aligned} \mathbf{v}_c^T \mathbf{A}_0^{-1} \mathbf{v}_j &\leq \frac{1}{4} \left( \frac{\tilde{n}}{p'(n) - \sqrt{4 \log(kn)p'(n)}} - \frac{\tilde{n}}{p'(n) + \sqrt{4 \log(kn)p'(n)} + 4 \log(kn)} \right) \\ &\leq \frac{1}{4} \cdot \frac{2\tilde{n}\sqrt{4 \log(kn)p'(n)} + 4\tilde{n} \log(kn)}{(p'(n) - \sqrt{4 \log(kn)p'(n)})(p'(n) + \sqrt{4 \log(kn)p'(n)})} \\ &\leq \frac{C_1 + 1}{2C_1 k} \cdot \frac{2n\sqrt{4 \log(kn)p'(n)} + 4n \log(kn)}{(p'(n) - \sqrt{4 \log(kn)p'(n)})(p'(n) + \sqrt{4 \log(kn)p'(n)})} \end{aligned}$$

with probability at least  $1 - \frac{2}{k^2 n^2}$ . Here, the last inequality follows because we have  $\tilde{n} \leq \frac{2(C_1+1)}{C_1} \cdot \frac{n}{k}$  on  $\mathcal{E}_v$ . Because  $p'(n) > Cn \log(kn)$ , we have

$$\begin{aligned} \mathbf{v}_c^T \mathbf{A}_0^{-1} \mathbf{v}_j &\leq \frac{C_1 + 1}{2C_1 k} \cdot \frac{2\sqrt{n}p'(n) \cdot \sqrt{4/C} + 4/C \cdot p'(n)}{\left(1 - \sqrt{4/(Cn)}\right) p'(n)^2} \\ &\leq \frac{C_1 + 1}{2C_1} \cdot \frac{\sqrt{n}}{k} \cdot \frac{2\sqrt{4/C} + \sqrt{4/(Cn)}}{p'(n)(1 - \sqrt{4/(Cn)})} \\ &\leq \frac{C_2 + 1}{C_2} \cdot \frac{\sqrt{n}}{kp}, \end{aligned}$$

where in the last step we use the fact that  $C > 1$  is large enough. To lower bound  $s_{cj}^{(0)}$ , we get

$$\begin{aligned} \mathbf{v}_c^T \mathbf{A}_0^{-1} \mathbf{v}_j &\geq \frac{1}{4} \left( \frac{\tilde{n}}{(p'(n) + \sqrt{4 \log(kn)p'(n)} + 4 \log(kn))} - \frac{\tilde{n}}{(p'(n) - \sqrt{4 \log(kn)p'(n)})} \right) \\ &\geq \frac{1}{4} \cdot \frac{-2\tilde{n}\sqrt{4 \log(kn)p'(n)} - 4\tilde{n} \log(kn)}{(p'(n) - \sqrt{4 \log(kn)p'(n)})(p'(n) + \sqrt{4 \log(kn)p'(n)})} \\ &\geq -\frac{C_1 + 1}{2C_1 k} \cdot \frac{2n\sqrt{4 \log(kn)p'(n)} + 4n \log(kn)}{(p'(n) - \sqrt{4 \log(kn)p'(n)})(p'(n) + \sqrt{4 \log(kn)p'(n)})} \end{aligned}$$

with probability at least  $1 - \frac{2}{k^2 n^2}$ . Then following similar steps to the upper bound of  $\mathbf{v}_c^T \mathbf{A}_0^{-1} \mathbf{v}_j$  gives us

$$\begin{aligned} \mathbf{v}_c^T \mathbf{A}_0^{-1} \mathbf{v}_j &\geq -\frac{C_1 + 1}{2C_1 k} \cdot \frac{2\sqrt{n}p'(n)\sqrt{4/C} + (4/C)p'(n)}{(p'(n) - \sqrt{4/(Cn)p'(n)})p'(n)} \\ &\geq -\frac{C_1 + 1}{2C_1} \cdot \frac{\sqrt{n}}{k} \cdot \frac{2\sqrt{4/C} + (4/C\sqrt{n})}{p'(n)(1 - \sqrt{4/(Cn)})} \\ &\geq -\frac{C_2 + 1}{C_2} \cdot \frac{\sqrt{n}}{kp}. \end{aligned}$$

We finally apply the union bound on all pairs of  $c, j \in [k]$  and complete the proof.

### C.5.3 Proof of Lemma 6

We first lower and upper bound  $g_{(y_i)i}^{(0)}$ . Recall that we assumed  $y_i = k$  without loss of generality. With a little abuse of notation, we define  $\|\mathbf{v}_k\|_2^2 = \tilde{n}$  and  $\mathbf{u} := \sqrt{\tilde{n}}\mathbf{e}_i$ . We use the parallelogram law to get

$$\mathbf{e}_i^T \mathbf{A}_0^{-1} \mathbf{v}_k = \frac{1}{4\sqrt{\tilde{n}}} \left( (\mathbf{u} + \mathbf{v}_k)^T \mathbf{A}_0^{-1} (\mathbf{u} + \mathbf{v}_k) - (\mathbf{u} - \mathbf{v}_k)^T \mathbf{A}_0^{-1} (\mathbf{u} - \mathbf{v}_k) \right).$$

Note that  $\|\mathbf{u} + \mathbf{v}_k\|_2^2 = 2(\tilde{n} + \sqrt{\tilde{n}})$  and  $\|\mathbf{u} - \mathbf{v}_k\|_2^2 = 2(\tilde{n} - \sqrt{\tilde{n}})$ . As before, we apply Lemma 7 with  $t = 2 \log(kn)$  to get with probability at least  $1 - \frac{2}{k^2 n^2}$ ,

$$\begin{aligned} \mathbf{e}_i^T \mathbf{A}_0^{-1} \mathbf{v}_k &\geq \frac{1}{4\sqrt{\tilde{n}}} \left( \frac{2(\tilde{n} + \sqrt{\tilde{n}})}{(p'(n) + \sqrt{4 \log(kn)p'(n)} + 4 \log(kn))} - \frac{2(\tilde{n} - \sqrt{\tilde{n}})}{(p'(n) - \sqrt{4 \log(kn)p'(n)})} \right) \\ &\geq \frac{1}{4\sqrt{\tilde{n}}} \cdot \frac{4\sqrt{\tilde{n}}p'(n) - 4\tilde{n}\sqrt{4 \log(kn)p'(n)} - 8\tilde{n} \log(kn)}{(p'(n) + \sqrt{4 \log(kn)p'(n)} + 4 \log(kn))p'(n)} \\ &\geq \frac{p'(n) - \sqrt{\tilde{n}}\sqrt{4 \log(kn)p'(n)} - 2\sqrt{\tilde{n}} \log(kn)}{(p'(n) + \sqrt{4 \log(kn)p'(n)} + 4 \log(kn))p'(n)}, \\ &\geq \frac{p'(n) - \sqrt{(1 + 1/C_1)n/k}\sqrt{4 \log(kn)p'(n)} - 2\sqrt{(1 + 1/C_1)n/k} \log(kn)}{(p'(n) + \sqrt{4 \log(kn)p'(n)} + 4 \log(kn))p'(n)}. \end{aligned}$$

The last inequality works on event  $\mathcal{E}_v$ , by which we have  $\tilde{n} \leq \frac{2(C_1+1)n}{C_1 k}$ . Then,  $p'(n) > Ck^3 n \log(kn)$  gives us

$$\begin{aligned} \mathbf{e}_i^T \mathbf{A}_0^{-1} \mathbf{v}_k &\geq \frac{p'(n) - \sqrt{(1+1/C_1)n/k} \sqrt{4/(Ck^3n)p'(n)} - \sqrt{(1+1/C_1)n/k} (2/Ck^3n)p'(n)}{(p'(n) + \sqrt{4 \log(kn)p'(n)} + 4 \log(kn))p'(n)} \\ &\geq \frac{1 - (1/(C_2\sqrt{k^4})) - (1/(C_3k^{3.5}\sqrt{n}))}{p'(n)(1 + 2\sqrt{4/(Ck^3n)})} \\ &\geq \frac{C_4 - 1}{C_4} \cdot \frac{1}{p}, \end{aligned}$$

where in the last step we use the fact that  $C, C_2, C_3 > 1$  are large enough. To upper bound  $g_{(y_i)i}^{(0)}$ , we have with probability at least  $1 - \frac{2}{k^2 n^2}$ ,

$$\begin{aligned} \mathbf{e}_i^T \mathbf{A}_0^{-1} \mathbf{v}_k &\leq \frac{1}{4\sqrt{\tilde{n}}} \left( \frac{2(\tilde{n} + \sqrt{\tilde{n}})}{(p'(n) - \sqrt{4 \log(kn)p'(n)})} - \frac{2(\tilde{n} - \sqrt{\tilde{n}})}{(p'(n) + \sqrt{4 \log(kn)p'(n)} + 4 \log(kn))} \right) \\ &\leq \frac{1}{4\sqrt{\tilde{n}}} \cdot \frac{4\sqrt{\tilde{n}}p'(n) + 4\tilde{n}\sqrt{4 \log(kn)p'(n)} + 8\tilde{n} \log(kn)}{(p'(n) - \sqrt{4 \log(kn)p'(n)})p'(n)} \\ &\leq \frac{p'(n) + \sqrt{\tilde{n}}\sqrt{4 \log(kn)p'(n)} + 2\sqrt{\tilde{n}} \log(kn)}{(p'(n) - \sqrt{4 \log(kn)p'(n)})p'(n)}, \\ &\leq \frac{p'(n) + \sqrt{(1+1/C_1)n/k} \sqrt{4 \log(kn)p'(n)} + 2\sqrt{(1+1/C_1)n/k} \log(kn)}{(p'(n) - \sqrt{4 \log(kn)p'(n)})p'(n)}. \end{aligned}$$

Then  $p'(n) > Ck^3 n \log(kn)$  gives us

$$\begin{aligned} \mathbf{e}_i^T \mathbf{A}_0^{-1} \mathbf{v}_k &\leq \frac{p'(n) + \sqrt{(1+1/C_1)n/k} \sqrt{4/(Ck^3n)p'(n)} + 2\sqrt{(1+1/C_1)n/k} (4/Ck^3n)p'(n)}{(p'(n) - \sqrt{4 \log(kn)p'(n)})p'(n)} \\ &\leq \frac{1 + (1/(C_2\sqrt{k^4})) + (1/(C_3k^{3.5}\sqrt{n}))}{p'(n)(1 - 2\sqrt{4/(Ck^3n)})} \\ &\leq \frac{C_4 + 1}{C_4} \cdot \frac{1}{p}. \end{aligned}$$

We now upper and lower bound  $g_{ji}^{(0)}$  for a fixed  $j \neq y_i$ . As before, we have

$$\mathbf{e}_i^T \mathbf{A}_0^{-1} \mathbf{v}_j = \frac{1}{4\sqrt{\tilde{n}}} ((\mathbf{u} + \mathbf{v}_j)^T \mathbf{A}_0^{-1} (\mathbf{u} + \mathbf{v}_j) - (\mathbf{u} - \mathbf{v}_j)^T \mathbf{A}_0^{-1} (\mathbf{u} - \mathbf{v}_j)).$$

Since  $\mathbf{e}_i^T \mathbf{v}_j = 0$ , we now have  $\|\mathbf{u} + \mathbf{v}_j\|_2^2 = \|\mathbf{u} - \mathbf{v}_j\|_2^2 = 2\tilde{n}$ . We apply Lemma 7 with  $t = 2 \log(kn)$  to get, with probability at least  $1 - \frac{2}{k^2 n^2}$ ,

$$\begin{aligned} \mathbf{e}_i^T \mathbf{A}_0^{-1} \mathbf{v}_j &\leq \frac{1}{4\sqrt{\tilde{n}}} \left( \frac{2\tilde{n}}{(p'(n) - \sqrt{4 \log(kn)p'(n)})} - \frac{2\tilde{n}}{(p'(n) + \sqrt{4 \log(kn)p'(n)} + 4 \log(kn))} \right) \\ &\leq \frac{1}{4\sqrt{\tilde{n}}} \cdot \frac{4\tilde{n}\sqrt{4 \log(kn)p'(n)} + 8\tilde{n} \log(kn)}{(p'(n) - \sqrt{4 \log(kn)p'(n)})p'(n)} \\ &\leq \frac{\sqrt{\tilde{n}}\sqrt{4 \log(kn)p'(n)} + 2\sqrt{\tilde{n}} \log(kn)}{(p'(n) - \sqrt{4 \log(kn)p'(n)})p'(n)}, \\ &\leq \frac{\sqrt{(1+1/C_1)n/k} \sqrt{4 \log(kn)p'(n)} + 2\sqrt{(1+1/C_1)n/k} \log(kn)}{(p'(n) - \sqrt{4 \log(kn)p'(n)})p'(n)}. \end{aligned}$$

The last inequality works on event  $\mathcal{E}_v$ , by which we have  $\tilde{n} \leq \frac{2(C_1+1)n}{C_1 k}$ . Then,  $p'(n) > Ck^3 n \log(kn)$  gives us

$$\begin{aligned} \mathbf{e}_i^T \mathbf{A}_0^{-1} \mathbf{v}_j &\leq \frac{\sqrt{(1+1/C_1)n/k} \sqrt{4/(Ck^3 n)} p'(n) + \sqrt{(1+1/C_1)n/k} (2/Ck^3 n) p'(n)}{(p'(n) - \sqrt{4 \log(kn) p'(n)}) p'(n)} \\ &\leq \frac{(1/(C_2 \sqrt{k^4})) + (1/(C_3 k^{3.5} \sqrt{n}))}{p'(n)(1 - \sqrt{4/(Ck^3 n)})} \\ &\leq \frac{C_4 + 1}{C_4} \cdot \frac{1}{k^2 p}, \end{aligned}$$

where in the last step we use the fact that  $C, C_2, C_3 > 1$  are large enough. To lower bound  $g_{ij}^{(0)}$ , we have with probability at least  $1 - \frac{2}{k^2 n^2}$ ,

$$\begin{aligned} \mathbf{e}_i^T \mathbf{A}_0^{-1} \mathbf{v}_j &\geq \frac{1}{4\sqrt{\tilde{n}}} \left( \frac{2\tilde{n}}{(p'(n) + \sqrt{4 \log(kn) p'(n)} + 4 \log(kn))} - \frac{2\tilde{n}}{(p'(n) - \sqrt{4 \log(kn) p'(n)})} \right) \\ &\geq \frac{1}{4\sqrt{\tilde{n}}} \cdot \frac{-4\tilde{n} \sqrt{4 \log(kn) p'(n)} - 8\tilde{n} \log(kn)}{(p'(n) - \sqrt{4 \log(kn) p'(n)}) p'(n)} \\ &\geq -\frac{\sqrt{\tilde{n}} \sqrt{4 \log(kn) p'(n)} + 2\sqrt{\tilde{n}} \log(kn)}{(p'(n) - \sqrt{4 \log(kn) p'(n)}) p'(n)}, \\ &\geq -\frac{\sqrt{(1+1/C_1)n/k} \sqrt{4 \log(kn) p'(n)} + 2\sqrt{(1+1/C_1)n/k} \log(kn)}{(p'(n) - \sqrt{4 \log(kn) p'(n)}) p'(n)}. \end{aligned}$$

Because  $p'(n) > Ck^3 n \log(kn)$ , we get

$$\begin{aligned} \mathbf{e}_i^T \mathbf{A}_0^{-1} \mathbf{v}_j &\geq -\frac{\sqrt{(1+1/C_1)n/k} \sqrt{4/(Ck^3 n)} p'(n) + \sqrt{(1+1/C_1)n/k} (2/Ck^3 n) p'(n)}{(p'(n) - \sqrt{4 \log(kn) p'(n)}) p'(n)} \\ &\geq -\frac{(1/(C_2 \sqrt{k^4})) + (1/(C_3 k^{3.5} \sqrt{n}))}{p'(n)(1 - \sqrt{4/(Ck^3 n)})} \\ &\geq -\frac{C_4 + 1}{C_4} \cdot \frac{1}{k^2 p}, \end{aligned}$$

where in the last step we use the fact that  $C, C_2, C_3 > 1$  are large enough. We complete the proof by applying a union bounds over all  $k$  classes and  $n$  training examples.

## D Proofs for Section 3.2.2

In this section, we provide the proofs of Theorems 3 and 4, which were discussed in Section 3.2.2. After having derived the interpolation condition in Equation (8) for multiclass SVM, these proofs are in fact rather simple extensions of the arguments provided in [MNS<sup>+</sup>20, HMX21] to the multiclass case. This is unlike the GMM case that we considered in Appendix C, which required substantial additional effort over and above the binary case [WT21].

### D.1 Proof of Theorem 3

For this section, we define  $\mathbf{A} = \mathbf{X}^T \mathbf{X}$  as shorthand (we denoted the same quantity as  $\mathbf{A}_k$  in Appendix C). Recall that the eigendecomposition of the covariance matrix is given by  $\Sigma = \sum_{i=1}^p \lambda_i \mathbf{v}_i \mathbf{v}_i^T = \mathbf{V} \mathbf{\Lambda} \mathbf{V}^T$ . By rotation invariance of the standard normal variable, we can write  $\mathbf{A} = \mathbf{Q}^T \mathbf{\Lambda} \mathbf{Q}$ , where the entries of  $\mathbf{Q} \in \mathbb{R}^{p \times n}$  are IID  $\mathcal{N}(0, 1)$  random variables. Finally, recall that we denoted  $\boldsymbol{\lambda} = [\lambda_1 \ \dots \ \lambda_p]$  and defined the effective dimensions  $d_2 = \frac{\|\boldsymbol{\lambda}\|_1^2}{\|\boldsymbol{\lambda}\|_2^2}$  and  $d_\infty = \frac{\|\boldsymbol{\lambda}\|_1}{\|\boldsymbol{\lambda}\|_\infty}$ . Observe that Eqn. (8) in Thm. 1 is equivalent to the condition

$$z_{ci} \mathbf{e}_i^T \mathbf{A}^{-1} \mathbf{z}_c > 0, \text{ for all } c \in [k] \text{ and } i \in [n]. \quad (48)$$

We fix  $c \in [k]$  and drop the subscript  $c$ , using  $\bar{\mathbf{z}}$  to denote the vector  $\mathbf{z}_c$ . We first provide a deterministic equivalence to Eqn. (8) that resembles the condition provided in [HMX21, Lemma 1]. Our proof is slightly modified compared to [HMX21, Lemma 1] and relies on elementary use of block matrix inversion identity.

**Lemma 8.** Let  $\mathbf{Q} \in \mathbb{R}^{p \times n} = [\mathbf{q}_1, \dots, \mathbf{q}_n]$ . In our notation, Eqn. (8) holds for a fixed  $c$  if and only if:

$$\frac{1}{z_i} \bar{\mathbf{z}}_{\setminus i}^T \left( \mathbf{Q}_{\setminus i}^T \mathbf{A} \mathbf{Q}_{\setminus i} \right)^{-1} \mathbf{Q}_{\setminus i}^T \mathbf{A} \mathbf{q}_i < 1, \text{ for all } i = 1, \dots, n. \quad (49)$$

Above,  $\bar{\mathbf{z}}_{\setminus i} \in \mathbb{R}^{(n-1) \times 1}$  is obtained by removing the  $i$ -th entry from vector  $\bar{\mathbf{z}}$  and  $\mathbf{Q}_{\setminus i} \in \mathbb{R}^{d \times (n-1)}$  is obtained by removing the  $i$ -th column from  $\mathbf{Q}$ .

*Proof.* By symmetry, it suffices to consider the case  $i = 1$ . We first write

$$\mathbf{A} = \begin{bmatrix} \mathbf{q}_1^T \mathbf{A} \mathbf{q}_1 & \mathbf{q}_1^T \mathbf{A} \mathbf{Q}_{\setminus 1} \\ \mathbf{Q}_{\setminus 1}^T \mathbf{A} \mathbf{q}_1 & \mathbf{Q}_{\setminus 1}^T \mathbf{A} \mathbf{Q}_{\setminus 1} \end{bmatrix} \triangleq \begin{bmatrix} \alpha & \mathbf{b}^T \\ \mathbf{b} & \mathbf{D} \end{bmatrix}.$$

By Schur complement [Ber09], we have

$$\mathbf{A} \succ \mathbf{0} \text{ iff either } \left\{ \alpha > 0 \text{ and } \mathbf{D} - \frac{\mathbf{b} \mathbf{b}^T}{\alpha} \succ \mathbf{0} \right\} \text{ or } \left\{ \mathbf{D} \succ \mathbf{0} \text{ and } \alpha - \mathbf{b}^T \mathbf{D}^{-1} \mathbf{b} > 0 \right\}.$$

Since the entries of  $\mathbf{Q}$  are drawn from a continuous distribution (IID standard Gaussian), both  $\mathbf{A}$  and  $\mathbf{D} = \mathbf{Q}_{\setminus 1}^T \mathbf{A} \mathbf{Q}_{\setminus 1}$  are positive definite almost surely. Therefore,  $\alpha - \mathbf{b}^T \mathbf{D}^{-1} \mathbf{b} > 0$  almost surely.

Thus, by block matrix inversion identity [Ber09], we have

$$\mathbf{A}^{-1} = \begin{bmatrix} (\alpha - \mathbf{b}^T \mathbf{D}^{-1} \mathbf{b})^{-1} & -(\alpha - \mathbf{b}^T \mathbf{D}^{-1} \mathbf{b})^{-1} \mathbf{b}^T \mathbf{D}^{-1} \\ -\mathbf{D}^{-1} \mathbf{b} (\alpha - \mathbf{b}^T \mathbf{D}^{-1} \mathbf{b})^{-1} & \mathbf{D}^{-1} + \mathbf{D}^{-1} \mathbf{b} (\alpha - \mathbf{b}^T \mathbf{D}^{-1} \mathbf{b})^{-1} \mathbf{b}^T \mathbf{D}^{-1} \end{bmatrix}.$$

Therefore,  $\mathbf{e}_1^T \mathbf{A}^{-1} = (\alpha - \mathbf{b}^T \mathbf{D}^{-1} \mathbf{b})^{-1} [1 \quad -\mathbf{b}^T \mathbf{D}^{-1}]$ . Hence we have

$$z_1 \mathbf{e}_1^T \mathbf{A}^{-1} \bar{\mathbf{z}} = (\alpha - \mathbf{b}^T \mathbf{D}^{-1} \mathbf{b})^{-1} (z_1^2 - \mathbf{b}^T \mathbf{D}^{-1} (z_1 \bar{\mathbf{z}}_{\setminus 1})),$$

where we use the fact that  $\bar{\mathbf{z}}_1 = z_1$ . Since  $\alpha - \mathbf{b}^T \mathbf{D}^{-1} \mathbf{b} > 0$  almost surely, we have

$$\begin{aligned} z_1 \mathbf{e}_1^T \mathbf{A}^{-1} \bar{\mathbf{z}} > 0 &\iff (\alpha - \mathbf{b}^T \mathbf{D}^{-1} \mathbf{b})^{-1} (z_1^2 - \mathbf{b}^T \mathbf{D}^{-1} (z_1 \bar{\mathbf{z}}_{\setminus 1})) > 0 \\ &\iff \frac{1}{z_1} \mathbf{b}^T \mathbf{D}^{-1} \bar{\mathbf{z}}_{\setminus 1} < 1. \end{aligned}$$

Recall that  $\mathbf{b}^T = \mathbf{q}_1^T \mathbf{A} \mathbf{Q}_{\setminus 1}$  and  $\mathbf{D} = \mathbf{Q}_{\setminus 1}^T \mathbf{A} \mathbf{Q}_{\setminus 1}$ . This completes the proof.  $\square$

Next, we define the following events:

1. For  $i \in [n]$ ,  $\mathcal{B}_i := \left\{ \frac{1}{z_i} \bar{\mathbf{z}}_{\setminus i}^T \mathbf{A}^{-1} \mathbf{Q}_{\setminus i}^T \mathbf{A} \mathbf{q}_i \geq 1 \right\}$ .
2. For  $i \in [n]$ , given  $t > 0$ ,  $\mathcal{E}_i(t) := \left\{ \|(\bar{\mathbf{z}}_{\setminus i}^T \mathbf{A}^{-1} \mathbf{Q}_{\setminus i}^T \mathbf{A})^T\|_2^2 \geq \frac{1}{t} \right\}$ .
3.  $\mathcal{B} := \cup_{i=1}^n \mathcal{B}_i$ .

We know all the data points are support vectors i.e., Eqn. (48) holds, if none of the events  $\mathcal{B}_i$  happens; hence,  $\mathcal{B}$  is the undesired event. We want to upper bound the probability of event  $\mathcal{B}$ . As in the argument provided in [HMX21], we have

$$\mathbb{P}(\mathcal{B}) \leq \sum_{i=1}^n \left( \mathbb{P}(\mathcal{B}_i | \mathcal{E}_i(t)^c) + \mathbb{P}(\mathcal{E}_i(t)) \right). \quad (50)$$

The lemma below gives an upper bound on  $\mathbb{P}(\mathcal{B}_i | \mathcal{E}_i(t)^c)$ .

**Lemma 9.** For any  $t > 0$ ,  $\mathbb{P}(\mathcal{B}_i | \mathcal{E}_i(t)^c) \leq 2 \exp\left(-\frac{t}{2ck^2}\right)$ .

*Proof.* On the event  $\mathcal{E}_i(t)^c$ , we have  $\|(\bar{\mathbf{z}}_{\setminus i}^T \mathbf{A}_{\setminus i}^{-1} \mathbf{Q}_{\setminus i}^T \mathbf{A})^T\|_2^2 \leq \frac{1}{t}$ . Since, by its definition,  $|\frac{1}{z_i}| \leq k$ , we have  $\frac{1}{z_i} \bar{\mathbf{z}}_{\setminus i}^T \mathbf{A}_{\setminus i}^{-1} \mathbf{Q}_{\setminus i}^T \mathbf{A} \mathbf{q}_i$  is conditionally sub-Gaussian [Wai19, Chapter 2] with parameter at most  $ck^2 \|(\bar{\mathbf{z}}_{\setminus i}^T \mathbf{A}_{\setminus i}^{-1} \mathbf{Q}_{\setminus i}^T \mathbf{A})^T\|_2^2 \leq ck^2/t$ . Then the sub-Gaussian tail bound gives

$$\mathbb{P}(\mathcal{B}_i | \mathcal{E}_i(t)^c) \leq 2 \exp\left(-\frac{t}{2ck^2}\right), \quad (51)$$

which completes the proof.  $\square$

Next we upper bound  $\mathbb{P}(\mathcal{E}_i(t))$  with  $t = d_\infty/(2n)$ . Since  $\|\mathbf{z}_{\setminus i}\|_2 \leq \|\mathbf{y}_{\setminus i}\|_2$ , we can directly use [HMX21, Lemma 4].

**Lemma 10** (Lemma 4, [HMX21]).  $\mathbb{P}(\mathcal{E}_i(\frac{d_\infty}{2n})) \leq 2 \cdot 9^{n-1} \cdot \exp(-c_1 \min\{\frac{d_2}{4c^2}, \frac{d_\infty}{c}\})$ .

The results above are proved for fixed choices of  $i \in [n]$  and  $c \in [k]$ . We combine Lemmas 9 and 10 with a union bound over all  $n$  training examples and  $k$  classes to upper bound the probability of the undesirable event  $\mathcal{B}$  over all  $k$  classes by:

$$\begin{aligned} kn9^{n-1} \cdot \exp\left(-c_1 \min\left\{\frac{d_2}{4c^2}, \frac{d_\infty}{c}\right\}\right) &\leq \exp\left(-c_1 \min\left\{\frac{d_2}{4c^2}, \frac{d_\infty}{c}\right\} + C_1 \log(kn) + C_2 n\right) \\ \text{and } 2kn \cdot \exp\left(-\frac{d_\infty}{2ck^2n}\right) &\leq \exp\left(-\frac{c_2 d_\infty}{ck^2n} + C_3 \log(kn)\right). \end{aligned}$$

Thus, the probability that every data point is a support vector is at least

$$1 - \exp\left(-c_1 \min\left\{\frac{d_2}{4c^2}, \frac{d_\infty}{c}\right\} + C_1 \log(kn) + C_2 n\right) - \exp\left(-\frac{c_2 d_\infty}{ck^2n} + C_3 \log(kn)\right).$$

To ensure that  $\exp(-c_1 \min\{\frac{d_2}{4c^2}, \frac{d_\infty}{c}\} + C_1 \log(kn) + C_2 n) + \exp(-\frac{c_2 d_\infty}{ck^2n} + C_3 \log(kn)) \leq \frac{c_4}{n}$ , we consider the conditions  $c_1 \min\{\frac{d_2}{4c^2}, \frac{d_\infty}{c}\} - C_1 \log(kn) - C_2 n \geq \log(n)$  and  $\frac{c_2 d_\infty}{ck^2n} - C_3 \log(kn) \geq \log(n)$  to be satisfied. These are equivalent to the conditions provided in Thm. 3. This completes the proof. Note that throughout the proof, we did not use any generative model assumptions on the labels given the covariates, so in fact our proof applies to scenarios beyond the MLM.  $\square$

## D.2 Proof of Theorem 4

Now, we prove the sharper statement for the isotropic case. This proof is an extension of the proof argument for the second statement in [MNS<sup>+</sup>20, Theorem 1]. As before, we seek sufficient conditions under which

$$z_{ci} \mathbf{e}_i^T \mathbf{A}^{-1} \mathbf{z}_c > 0 \text{ for all } c \in [k] \text{ and } i \in [n]. \quad (52)$$

We again fix  $i \in [n]$  and  $c \in [k]$ , and we use  $\bar{\mathbf{z}}$  to denote the vector  $\mathbf{z}_c$  as shorthand. We define  $\mathbf{u}_i = \frac{1}{|z_i|} \|\bar{\mathbf{z}}\|_2 z_i \mathbf{e}_i$ . We use the parallelogram law to get:

$$z_i \mathbf{e}_i^T \mathbf{A}^{-1} \bar{\mathbf{z}} = \frac{|z_i|}{\|\bar{\mathbf{z}}\|_2} \mathbf{u}_i^T \mathbf{A}^{-1} \bar{\mathbf{z}} = \frac{1}{4} \frac{|z_i|}{\|\bar{\mathbf{z}}\|_2} \left( (\mathbf{u}_i + \bar{\mathbf{z}})^T \mathbf{A}^{-1} (\mathbf{u}_i + \bar{\mathbf{z}}) - (\mathbf{u}_i - \bar{\mathbf{z}})^T \mathbf{A}^{-1} (\mathbf{u}_i - \bar{\mathbf{z}}) \right). \quad (53)$$

In the isotropic case,  $\mathbf{A}^{-1}$  follows the inverse Wishart distribution. Thus, we can apply Lemma 7 with  $t = 2 \log(\sqrt{kn})$ . We know that  $\|\mathbf{u}_i + \bar{\mathbf{z}}\|_2^2 = 2(\|\bar{\mathbf{z}}\|_2^2 + |z_i| \|\bar{\mathbf{z}}\|_2)$  and  $\|\mathbf{u}_i - \bar{\mathbf{z}}\|_2^2 = 2(\|\bar{\mathbf{z}}\|_2^2 - |z_i| \|\bar{\mathbf{z}}\|_2)$ . We consider the worst case  $z_i = -\frac{1}{k}$ . Under the condition  $p'(n) = p - n + 1 > 10k^2 n \log(\sqrt{kn})$ , we have  $\sqrt{4n \log(\sqrt{kn})} < \frac{2}{3k} \sqrt{p'(n)}$ . Thus, we have for all  $i \in [n]$  and with probability at least

$1 - \frac{2}{kn^2}$ :

$$\begin{aligned}
z_i \mathbf{e}_i^T \mathbf{A}_0^{-1} \bar{\mathbf{z}} &\geq \frac{|z_i|}{4\|\bar{\mathbf{z}}\|_2} \left( \frac{\|\bar{\mathbf{z}}\|_2^2 + |z_i|\|\bar{\mathbf{z}}\|_2}{(p'(n) + \sqrt{4\log(\sqrt{kn})p'(n)} + 4\log(\sqrt{kn}))} - \frac{\|\bar{\mathbf{z}}\|_2^2 - |z_i|\|\bar{\mathbf{z}}\|_2}{(p'(n) - \sqrt{4\log(\sqrt{kn})p'(n)})} \right) \\
&\geq \frac{|z_i|}{8\|\bar{\mathbf{z}}\|_2} \cdot \frac{2|z_i|\|\bar{\mathbf{z}}\|_2 p'(n) - 2\|\bar{\mathbf{z}}\|_2^2 \sqrt{4\log(\sqrt{kn})p'(n)} - 4\|\bar{\mathbf{z}}\|_2^2 \log(\sqrt{kn})}{(p'(n) + \sqrt{4\log(\sqrt{kn})p'(n)})(p'(n) - \sqrt{4\log(\sqrt{kn})p'(n)})} \\
&\geq \frac{|z_i|}{8} \cdot \frac{2|z_i|p'(n) - 2\sqrt{4n\log(\sqrt{kn})p'(n)} - 4n\log(\sqrt{kn})}{(p'(n) + \sqrt{4\log(\sqrt{kn})p'(n)})(p'(n) - \sqrt{4\log(\sqrt{kn})p'(n)})}, \tag{54}
\end{aligned}$$

where the last inequality uses the fact that  $\|\bar{\mathbf{z}}\|_2 \leq \sqrt{n}$ . When  $|z_i| = 1/k$ , we would like  $2\sqrt{4n\log(\sqrt{kn})p'(n)}$  in the numerator of (54) to be smaller than  $p'(n)/(Ck)$ , thus we would like  $\sqrt{4n\log(\sqrt{kn})} \leq \sqrt{p'(n)}/k$ , which holds if  $p'(n) > 9k^2n\log(\sqrt{kn})$ . Under this condition, we get

$$\begin{aligned}
(54) &> \frac{|z_i|}{8} \cdot \frac{2|z_i|p'(n) - \frac{4}{3k}p'(n) - \frac{4}{9k^2}p'(n)}{(p'(n) + \sqrt{4/(9kn)p'(n)})p'(n)} \\
&\geq \frac{|z_i|}{8} \cdot \frac{\frac{1}{k}(2p'(n) - \frac{4}{3}p'(n) - \frac{4}{9}p'(n))}{2p'(n)^2} \\
&\geq \frac{|z_i|}{8} \cdot \frac{(2 - \frac{4}{3} - \frac{4}{9})}{2kp} \\
&\geq \frac{|z_i|}{72kp},
\end{aligned}$$

where we again use the relation  $4n\log(\sqrt{kn}) < \frac{4}{9k^2}p'(n)$ , for all  $i \in [n]$ . Thus we have shown that under this condition,  $z_{ci} \mathbf{e}_i^T \mathbf{A}^{-1} \mathbf{z}_c > 0$  for a fixed  $i \in [n]$  and  $c \in [k]$  with probability at least  $1 - \frac{c_0}{kn^2}$ . Finally, we apply the union bound over all  $n$  examples and all  $k$  classes, which gives  $z_{ci} \mathbf{e}_i^T \mathbf{A}_0^{-1} \mathbf{z}_c > 0$  for all  $i \in [n]$  and  $c \in [k]$  with probability at least  $1 - \frac{c_0}{n}$ . This completes the proof. As in the proof of Thm. 3, we did not use any generative model assumptions on the labels given the covariates.  $\square$

## E Classification error proofs

In this section, we provide the proofs of classification error of the MNI under both GMM and MLM models. We begin with the proof for the GMM case (Thm. 5).

### E.1 Proof of Theorem 5

#### E.1.1 Proof strategy and notations

The notation and main arguments of this proof follow closely the content of Section C.

Our starting point here is the lemma below (adapted from [TOS20, D.10]) that provides a simpler upper bound on the class-wise error  $\mathbb{P}_{e|c}$ .

**Lemma 11.** *Under GMM,  $\mathbb{P}_{e|c} \leq \sum_{j \neq c} Q \left( \frac{(\hat{\mathbf{w}}_c - \hat{\mathbf{w}}_j)^T \boldsymbol{\mu}_c}{\|\hat{\mathbf{w}}_c - \hat{\mathbf{w}}_j\|_2} \right)$ . In particular, if  $(\hat{\mathbf{w}}_c - \hat{\mathbf{w}}_j)^T \boldsymbol{\mu}_c > 0$ , then  $\mathbb{P}_{e|c} \leq \sum_{j \neq c} \exp \left( -\frac{((\hat{\mathbf{w}}_c - \hat{\mathbf{w}}_j)^T \boldsymbol{\mu}_c)^2}{4(\hat{\mathbf{w}}_c^T \hat{\mathbf{w}}_c + \hat{\mathbf{w}}_j^T \hat{\mathbf{w}}_j)} \right)$ .*

*Proof.* [TOS20, D.10] shows  $\mathbb{P}_{e|c}$  is upper bounded by  $\sum_{j \neq c} Q\left(\frac{(\widehat{\mathbf{w}}_c - \widehat{\mathbf{w}}_j)^T \boldsymbol{\mu}_c}{\|\widehat{\mathbf{w}}_c - \widehat{\mathbf{w}}_j\|_2}\right)$ . Then if  $(\widehat{\mathbf{w}}_c - \widehat{\mathbf{w}}_j)^T \boldsymbol{\mu}_c > 0$ , the Chernoff bound [Wai19, Ch. 2] gives

$$\mathbb{P}_{e|c} \leq \sum_{j \neq c} \exp\left(-\frac{((\widehat{\mathbf{w}}_c - \widehat{\mathbf{w}}_j)^T \boldsymbol{\mu}_c)^2}{2\|\widehat{\mathbf{w}}_c - \widehat{\mathbf{w}}_j\|_2^2}\right) \leq \sum_{j \neq c} \exp\left(-\frac{((\widehat{\mathbf{w}}_c - \widehat{\mathbf{w}}_j)^T \boldsymbol{\mu}_c)^2}{4(\widehat{\mathbf{w}}_c^T \widehat{\mathbf{w}}_c + \widehat{\mathbf{w}}_j^T \widehat{\mathbf{w}}_j)}\right),$$

where the last inequality uses the identity  $\mathbf{a}^T \mathbf{b} \leq 2(\mathbf{a}^T \mathbf{a} + \mathbf{b}^T \mathbf{b})$ .  $\square$

Thanks to Lemma 11, we can upper bound  $P_{e|c}$  by lower bounding the terms

$$\frac{((\widehat{\mathbf{w}}_c - \widehat{\mathbf{w}}_j)^T \boldsymbol{\mu}_c)^2}{(\widehat{\mathbf{w}}_c^T \widehat{\mathbf{w}}_c + \widehat{\mathbf{w}}_j^T \widehat{\mathbf{w}}_j)}, \text{ for all } c \neq j \in [k]. \quad (55)$$

Our key observation is that this can be accomplished without the need to control the more intricate cross-correlation terms  $\widehat{\mathbf{w}}_c^T \widehat{\mathbf{w}}_j$  for  $c \neq j \in [k]$ .

Without loss of generality, we assume onwards that  $c = k$  and  $j = k - 1$  (as in Appendix C). Similar to Appendix C, the quadratic forms introduced in Eqn. (28) play key role here, as well. For convenience, we recall the definitions of the  $c$ -th order quadratic forms for  $c, j, m \in [k]$  and  $i \in [n]$ :

$$\begin{aligned} s_{mj}^{(c)} &:= \mathbf{v}_m^T \mathbf{A}_c^{-1} \mathbf{v}_j, \\ t_{mj}^{(c)} &:= \mathbf{d}_m^T \mathbf{A}_c^{-1} \mathbf{d}_j, \\ h_{mj}^{(c)} &:= \mathbf{v}_m^T \mathbf{A}_c^{-1} \mathbf{d}_j, \\ g_{ji}^{(c)} &:= \mathbf{v}_j^T \mathbf{A}_c^{-1} \mathbf{e}_i, \\ f_{ji}^{(c)} &:= \mathbf{d}_j^T \mathbf{A}_c^{-1} \mathbf{e}_i. \end{aligned}$$

Further, recall that  $\widehat{\mathbf{w}}_c = \mathbf{X}(\mathbf{X}^T \mathbf{X})^{-1} \mathbf{v}_c$  and  $\mathbf{X} = \sum_{j=1}^k \boldsymbol{\mu}_j \mathbf{v}_j^T + \mathbf{Q}$ . Also, from orthogonality of the class mean vectors (Assumption 2), we have  $\boldsymbol{\mu}_c^T \mathbf{X} = \|\boldsymbol{\mu}\|_2^2 \mathbf{v}_c^T + \mathbf{d}_c^T$ . Thus,

$$\widehat{\mathbf{w}}_c^T \boldsymbol{\mu}_c - \widehat{\mathbf{w}}_j^T \boldsymbol{\mu}_c = \|\boldsymbol{\mu}\|_2^2 \mathbf{v}_c^T (\mathbf{X}^T \mathbf{X})^{-1} \mathbf{v}_c + \mathbf{v}_c^T (\mathbf{X}^T \mathbf{X})^{-1} \mathbf{d}_c - \|\boldsymbol{\mu}\|_2^2 \mathbf{v}_c^T (\mathbf{X}^T \mathbf{X})^{-1} \mathbf{v}_j - \mathbf{v}_j^T (\mathbf{X}^T \mathbf{X})^{-1} \mathbf{d}_c. \quad (56)$$

Additionally,

$$\widehat{\mathbf{w}}_c^T \widehat{\mathbf{w}}_c = \mathbf{v}_c^T (\mathbf{X}^T \mathbf{X})^{-1} \mathbf{v}_c, \text{ and } \widehat{\mathbf{w}}_j^T \widehat{\mathbf{w}}_j = \mathbf{v}_j^T (\mathbf{X}^T \mathbf{X})^{-1} \mathbf{v}_j.$$

Using the leave-one-out trick in Appendix C.1 and the matrix-inversion lemma, we show in Appendix E.1.5 that (55) is

$$\left( \frac{\|\boldsymbol{\mu}\|_2^2 s_{cc}^{(j)} - s_{cc}^{(j)} t_{cc}^{(j)} + h_{cc}^{(j)2} + h_{cc}^{(j)} - \|\boldsymbol{\mu}\|_2^2 s_{jc}^{(j)} - h_{jc}^{(j)} - h_{jc}^{(j)} h_{cc}^{(j)} + s_{jc}^{(j)} t_{cc}^{(j)}}{\det_j} \right)^2 / \left( \frac{s_{cc}^{(j)}}{\det_j} + \frac{s_{jj}^{(-j)}}{\det_{-j}} \right), \quad (57)$$

where  $\det_j = (\|\boldsymbol{\mu}\|_2^2 - t_{cc}^{(j)}) s_{cc}^{(j)} + (h_{cc}^{(j)} + 1)^2$ . Note that  $\det_j = \det_{-c}$  when  $c = k$  and  $j = k - 1$ .

Next, we will prove that

$$(57) \geq \|\boldsymbol{\mu}\|_2^2 \frac{\left( \left( 1 - \frac{C_1}{\sqrt{n}} - \frac{C_2 n}{p} \right) \|\boldsymbol{\mu}\|_2 - C_3 \sqrt{k} \right)^2}{C_6 \left( \|\boldsymbol{\mu}\|_2^2 + \frac{kp}{n} \right)}. \quad (58)$$

### E.1.2 Proof of Equation (58)

We will lower bound the numerator and upper bound the denominator of Eqn. (57). We will work on the high-probability event  $\mathcal{E}_v$  defined in Eqn. (37) in Appendix C.3. For quadratic forms such as

$s_{cc}^{(j)}, t_{cc}^{(j)}$  and  $h_{cc}^{(j)}$ , the Gram matrix  $\mathbf{A}_j^{-1}$  does not “include” the  $c$ -th mean component because we have fixed  $c = k, j = k - 1$ . Thus, we can directly apply Lemma 2 to get

$$\begin{aligned} \frac{C_1 - 1}{C_1} \cdot \frac{n}{kp} &\leq s_{cc}^{(j)} \leq \frac{C_1 + 1}{C_1} \cdot \frac{n}{kp}, \\ t_{cc}^{(j)} &\leq \frac{C_2 n \|\boldsymbol{\mu}\|_2^2}{p}, \\ -\frac{C_3 n \|\boldsymbol{\mu}\|_2}{\sqrt{kp}} &\leq h_{cc}^{(j)} \leq \frac{C_3 n \|\boldsymbol{\mu}\|_2}{\sqrt{kp}}, \end{aligned}$$

on the event  $\mathcal{E}_v$ . We need some additional work to bound  $s_{jc}^{(j)} = \mathbf{v}_j \mathbf{A}_j^{-1} \mathbf{v}_c$  and  $h_{jc}^{(j)} = \mathbf{v}_j \mathbf{A}_j^{-1} \mathbf{d}_c$ , since the Gram matrix  $\mathbf{A}_j^{-1}$  “includes”  $\mathbf{v}_j$ . The proof here follows the machinery introduced in Appendix C.4 for proving Lemma 2. We provide the core argument and refer the reader therein for additional justifications. By Eqn. (71) in Appendix F.1 (with the index  $j - 1$  replacing the index 0), we first have

$$s_{jc}^{(j)} = s_{jc}^{(j-1)} - \frac{1}{\det_{j-1}} (\star)_s^{(j-1)},$$

where we define

$$(\star)_s^{(j-1)} = (\|\boldsymbol{\mu}\|_2^2 - t_{jj}^{(j-1)}) s_{jj}^{(j-1)} s_{jc}^{(j-1)} + s_{jc}^{(j-1)} h_{jj}^{(j-1)^2} + s_{jc}^{(j-1)} h_{jj}^{(j-1)} + s_{jj}^{(j-1)} h_{jc}^{(j-1)},$$

and  $\det_{j-1} = (\|\boldsymbol{\mu}\|_2^2 - t_{jj}^{(j-1)}) s_{jj}^{(j-1)} + (h_{jj}^{(j-1)} + 1)^2$ . Further, we have

$$\begin{aligned} |s_{jc}^{(j)}| &= \left| \left( 1 - \frac{(\|\boldsymbol{\mu}\|_2^2 - t_{jj}^{(j-1)}) s_{jj}^{(j-1)} + h_{jj}^{(j-1)^2}}{\det_{j-1}} \right) s_{jc}^{(j-1)} - \frac{1}{\det_{j-1}} (s_{jc}^{(j-1)} h_{jj}^{(j-1)} + s_{jj}^{(j-1)} h_{jc}^{(j-1)}) \right| \\ &\leq \frac{1}{C} |s_{jc}^{(j-1)}| + \frac{1}{\det_{j-1}} |(s_{jc}^{(j-1)} h_{jj}^{(j-1)} + s_{jj}^{(j-1)} h_{jc}^{(j-1)})|. \end{aligned}$$

We focus on the dominant term  $|s_{jj}^{(j-1)} h_{jc}^{(j-1)}|$ . Using a similar argument to that provided in Appendix C.4, we get

$$\frac{|s_{jj}^{(j-1)} h_{jc}^{(j-1)}|}{\det_{j-1}} \leq \frac{|s_{jj}^{(j-1)} h_{jc}^{(j-1)}|}{(1 + h_{jj}^{(j-1)})^2} \leq \frac{C_1}{\left(1 - \frac{C_2 \epsilon}{k^2 \sqrt{n}}\right)^2} \cdot \frac{n}{kp} \cdot \frac{\epsilon}{k^2 \sqrt{n}} \leq \frac{C_3 \epsilon}{\left(1 - \frac{C_2 \epsilon}{k^2 \sqrt{n}}\right)^2} \cdot \frac{\sqrt{n}}{kp}.$$

Thus, we have

$$|s_{jc}^{(j-1)}| \leq \frac{C_4 + 1}{C_4} \cdot \frac{\sqrt{n}}{kp}.$$

Similarly, we bound the remaining term  $h_{jc}^{(j)}$ . Specifically, by Eqn. (73) in Section F.1, we have

$$h_{jc}^{(j)} = h_{jc}^{(j-1)} - \frac{1}{\det_{j-1}} (\star)_h^{(j-1)},$$

where we define

$$(\star)_h^{(j-1)} = (\|\boldsymbol{\mu}\|_2^2 - t_{jj}^{(j-1)}) s_{jj}^{(j-1)} h_{jc}^{(j-1)} + h_{jc}^{(j-1)} h_{jj}^{(j-1)^2} + h_{jc}^{(j-1)} h_{jj}^{(j-1)} + s_{jj}^{(j-1)} t_{jc}^{(j-1)}.$$

Furthermore,

$$\begin{aligned} |h_{jc}^{(j)}| &= \left| \left( 1 - \frac{(\|\boldsymbol{\mu}\|_2^2 - t_{jj}^{(j-1)}) s_{jj}^{(j-1)} + h_{jj}^{(j-1)^2}}{\det_{j-1}} \right) h_{jc}^{(j-1)} - \frac{1}{\det_{j-1}} (h_{jc}^{(j-1)} h_{jj}^{(j-1)} + s_{jj}^{(j-1)} t_{jc}^{(j-1)}) \right| \\ &\leq \frac{1}{C} |h_{jc}^{(j-1)}| + \frac{1}{\det_{j-1}} |(h_{jc}^{(j-1)} h_{jj}^{(j-1)} + s_{jj}^{(j-1)} t_{jc}^{(j-1)})|. \end{aligned}$$

We again consider the dominant term  $|s_{jj}^{(j-1)}t_{jc}^{(j-1)}|/\det_{j-1}$  and get

$$\frac{|s_{jj}^{(j-1)}t_{jc}^{(j-1)}|}{\det_{j-1}} \leq \frac{|s_{jj}^{(j-1)}t_{jc}^{(j-1)}|}{(1+h_{jj}^{(j-1)})^2} \leq \frac{C_1}{\left(1-\frac{C_2\epsilon}{k^2\sqrt{n}}\right)^2} \cdot \frac{n}{kp} \cdot \frac{n\|\boldsymbol{\mu}\|_2^2}{p} \leq \frac{C_3\epsilon}{\left(1-\frac{C_2\epsilon}{k^2\sqrt{n}}\right)^2 k^2\sqrt{n}} \cdot \frac{n\|\boldsymbol{\mu}\|_2}{\sqrt{kp}}.$$

Thus, we find that

$$|h_{jc}^{(j-1)}| \leq \frac{C_4n\|\boldsymbol{\mu}\|_2}{\sqrt{kp}}.$$

We are now ready to lower bound the RHS in Eqn. (57) by lower bounding its numerator and upper bounding its denominator.

First, for the numerator we have the following sequence of inequalities:

$$\begin{aligned} & \|\boldsymbol{\mu}\|_2^2 s_{cc}^{(j)} - s_{cc}^{(j)} t_{cc}^{(j)} + h_{cc}^{(j)2} + h_{cc}^{(j)} - \|\boldsymbol{\mu}\|_2^2 s_{jc}^{(j)} - h_{jc}^{(j)} - h_{jc}^{(j)} h_{cc}^{(j)} + s_{jc}^{(j)} t_{cc}^{(j)} \\ & \geq \|\boldsymbol{\mu}\|_2^2 s_{cc}^{(j)} - \|\boldsymbol{\mu}\|_2^2 s_{jc}^{(j)} - s_{cc}^{(j)} t_{cc}^{(j)} + s_{jc}^{(j)} t_{cc}^{(j)} + h_{cc}^{(j)} - h_{jc}^{(j)} - h_{jc}^{(j)} h_{cc}^{(j)} \\ & \geq \frac{C_1-1}{C_1} \cdot \frac{\|\boldsymbol{\mu}\|_2^2 n}{kp} - \frac{C_2+1}{C_2} \cdot \frac{\|\boldsymbol{\mu}\|_2^2 \sqrt{n}}{kp} - \frac{C_3n}{p} \cdot \frac{\|\boldsymbol{\mu}\|_2^2 n}{kp} - \frac{C_4n}{p} \cdot \frac{\|\boldsymbol{\mu}\|_2^2 \sqrt{n}}{kp} - \frac{C_5n\|\boldsymbol{\mu}\|_2}{\sqrt{kp}}. \end{aligned}$$

Above, we use the fact that the terms  $|h_{cc}^{(j)}|, |h_{jc}^{(j)}| \leq C\epsilon/(k^2\sqrt{n})$  are sufficiently small compared to 1. Consequently, the numerator is lower bounded by

$$\left( \frac{C_1-1}{C_1} \cdot \frac{\|\boldsymbol{\mu}\|_2^2 n}{kp} - \frac{C_2+1}{C_2} \cdot \frac{\|\boldsymbol{\mu}\|_2^2 \sqrt{n}}{kp} - \frac{C_3n}{p} \cdot \frac{\|\boldsymbol{\mu}\|_2^2 n}{kp} - \frac{C_4n}{p} \cdot \frac{\|\boldsymbol{\mu}\|_2^2 \sqrt{n}}{kp} - \frac{C_5n\|\boldsymbol{\mu}\|_2}{\sqrt{kp}} \right)^2 / \det_j^2. \quad (59)$$

Second, we upper bound the denominator. For this, note that under the assumption of equal energy and equal priors on class means (Assumption 1), there exist constants  $C_1, C_2 > 0$  such that  $C_1 \leq \det_j / \det_{-j} \leq C_2$ . (In fact, a very similar statement was proved in Eqn. (34) and used in the proof of Theorem 2). Moreover, Lemma 2 shows that the terms  $s_{cc}^{(j)}$  and  $s_{jj}^{(-j)}$  are of the same order, so it suffices to upper bound  $\frac{s_{cc}^{(j)}}{\det_j}$ . Again applying Lemma 2, we have

$$\frac{s_{cc}^{(j)}}{\det_j} \leq \frac{C_6}{\det_j} \cdot \frac{n}{kp} \quad (60)$$

on the event  $\mathcal{E}_v$ . Then, combining Equations (59) and (60) gives us

$$\begin{aligned} (57) & \geq \frac{n}{C_0kp} \cdot \frac{1}{\det_j} \left( \left(1 - \frac{C_1}{\sqrt{n}} - \frac{C_2n}{p}\right) \|\boldsymbol{\mu}\|_2^2 - C_3\sqrt{k}\|\boldsymbol{\mu}\|_2 \right)^2 \\ & \geq \frac{n}{C_0kp} \cdot \frac{1}{\frac{C_4\|\boldsymbol{\mu}\|_2^2 n}{kp} + 2 + \frac{C_5n^2\|\boldsymbol{\mu}\|_2^2}{kp^2}} \left( \left(1 - \frac{C_1}{\sqrt{n}} - \frac{C_2n}{p}\right) \|\boldsymbol{\mu}\|_2^2 - C_3\sqrt{k}\|\boldsymbol{\mu}\|_2 \right)^2 \\ & \geq \frac{\left( \left(1 - \frac{C_1}{\sqrt{n}} - \frac{C_2n}{p}\right) \|\boldsymbol{\mu}\|_2 - C_3\sqrt{k} \right)^2}{C_6 \left( \|\boldsymbol{\mu}\|_2^2 + \frac{kp}{n} \right)}, \end{aligned} \quad (61)$$

where the second inequality follows from the following upper bound on  $\det_j$  on the event  $\mathcal{E}_v$ :

$$\det_j = (\|\boldsymbol{\mu}\|_2^2 - t_{cc}^{(j)}s_{cc}^{(j)} + (h_{cc}^{(j)} + 1)^2) \leq \|\boldsymbol{\mu}\|_2^2 s_{cc}^{(j)} + 2(h_{cc}^{(j)2} + 1) \leq \frac{C_4\|\boldsymbol{\mu}\|_2^2 n}{kp} + 2 + \frac{C_5n^2\|\boldsymbol{\mu}\|_2^2}{kp^2}.$$

### E.1.3 Completing the proof

Because of our assumption of equal energy on class means and equal priors, the analysis above can be applied to bound  $\frac{((\hat{\mathbf{w}}_c - \hat{\mathbf{w}}_j)^T \boldsymbol{\mu}_c)^2}{(\hat{\mathbf{w}}_c^T \hat{\mathbf{w}}_c + \hat{\mathbf{w}}_j^T \hat{\mathbf{w}}_j)}$ , for every  $j \neq c$  and  $c \in [k]$ . We define the *unconditional* event

$$\mathcal{E}_{u2} := \left\{ \frac{((\hat{\mathbf{w}}_c - \hat{\mathbf{w}}_j)^T \boldsymbol{\mu}_c)^2}{(\hat{\mathbf{w}}_c^T \hat{\mathbf{w}}_c + \hat{\mathbf{w}}_j^T \hat{\mathbf{w}}_j)} \text{ is lower bounded by (61) for every } j \neq c \right\}.$$

We have

$$\begin{aligned}\mathbb{P}(\mathcal{E}_{u2}^c) &\leq \mathbb{P}(\mathcal{E}_{u2}^c | \mathcal{E}_v) + \mathbb{P}(\mathcal{E}_v^c) \\ &\leq \frac{C_4}{n} + c_5 k (e^{-\frac{n}{c_6}} + e^{-\frac{n}{c_7 k^2}}) \leq \frac{C_4}{n} + c_8 k e^{-\frac{n}{c_7 k^2}}\end{aligned}$$

for constants  $c_i$ 's  $> 1$ . Thus, the class-wise error  $\mathbb{P}_{e|c}$  is upper bounded by

$$(k-1) \exp \left( -\frac{\|\boldsymbol{\mu}\|_2^2 \left( \left( 1 - \frac{C_1}{\sqrt{n}} - \frac{C_2 n}{p} \right) \|\boldsymbol{\mu}\|_2 - C_3 \sqrt{k} \right)^2}{C_4 \left( \|\boldsymbol{\mu}\|_2^2 + \frac{k p}{n} \right)} \right)$$

with probability at least  $1 - \frac{c_4}{n} - c_8 k e^{-\frac{n}{c_7 k^2}}$ . This completes the proof.  $\square$

#### E.1.4 Proof of Equation (57)

Here, using the results of Section F.1, we show how to obtain Eqn. (57) from Eqn. (55). First, by [WT21, Appendix C.2] (with  $\mathbf{y}$  replaced by  $\mathbf{v}_m$ ), we have

$$\mathbf{v}_m (\mathbf{X}^T \mathbf{X})^{-1} \mathbf{v}_m = \frac{s_{mm}^{(-m)}}{\det_{-m}}, \text{ for all } m \in [k],$$

where  $\det_{-m} = (\|\boldsymbol{\mu}\|_2^2 - t_{mm}^{(-m)}) s_{mm}^{(-m)} + (h_{mm}^{(-m)} + 1)^2$ . Then [WT21, Equation (44)] gives

$$\|\boldsymbol{\mu}_c\|_2^2 \cdot \mathbf{v}_c (\mathbf{X}^T \mathbf{X})^{-1} \mathbf{v}_c + \mathbf{v}_c (\mathbf{X}^T \mathbf{X})^{-1} \mathbf{d}_c = \frac{\|\boldsymbol{\mu}_c\|_2^2 s_{cc}^{(j)} - s_{cc}^{(j)} t_{cc}^{(j)} + h_{cc}^{(j)2} + h_{cc}^{(j)}}{\det_j},$$

where  $\det_j = (\|\boldsymbol{\mu}\|_2^2 - t_{cc}^{(j)}) s_{cc}^{(j)} + (h_{cc}^{(j)} + 1)^2$ . Note that  $\det_j = \det_{-c}$  when  $c = k$  and  $j = k - 1$ .

For  $\mathbf{v}_c (\mathbf{X}^T \mathbf{X})^{-1} \mathbf{v}_j$  and  $\mathbf{v}_j (\mathbf{X}^T \mathbf{X})^{-1} \mathbf{d}_c$ , we can again express the  $k$ -th order quadratic forms in terms of  $j$ -th order quadratic forms as follows:

$$\begin{aligned}\mathbf{v}_c (\mathbf{X}^T \mathbf{X})^{-1} \mathbf{v}_j &= \frac{s_{cj}^{(j)} + s_{cj}^{(j)} h_{cc}^{(j)} - s_{cc}^{(j)} h_{jc}^{(j)}}{\det_j}, \\ \mathbf{v}_j (\mathbf{X}^T \mathbf{X})^{-1} \mathbf{d}_c &= \frac{\|\boldsymbol{\mu}\|_2^2 s_{cc}^{(j)} h_{jc}^{(j)} - \|\boldsymbol{\mu}\|_2^2 s_{cj}^{(j)} h_{cc}^{(j)} + h_{cc}^{(j)} h_{jc}^{(j)} + h_{jc}^{(j)} - s_{cj}^{(j)} t_{cc}^{(j)}}{\det_j}.\end{aligned}$$

Thus, we have

$$\|\boldsymbol{\mu}\|_2^2 \mathbf{v}_c (\mathbf{X}^T \mathbf{X})^{-1} \mathbf{v}_j + \mathbf{v}_j (\mathbf{X}^T \mathbf{X})^{-1} \mathbf{d}_c = \frac{\|\boldsymbol{\mu}_c\|_2^2 s_{jc}^{(j)} + h_{jc}^{(j)} + h_{jc}^{(j)} h_{cc}^{(j)} - s_{jc}^{(j)} t_{cc}^{(j)}}{\det_j}.$$

This completes the proof.  $\square$

#### E.1.5 Extensions to unorthogonal means

While we made the orthogonality assumption on class means (Assumption 2) for simplicity, our error analysis can conceivably be extended to the more general unorthogonal setting. We provide a brief discussion of this extension here. To upper bound the class-wise error  $\mathbb{P}_{e|c}$ , recall that we need to lower bound the quantity in Eqn. (55). As with the orthogonal case, we consider  $c = k, j = k - 1$  without loss of generality. Recall that  $\hat{\mathbf{w}}_c = \mathbf{X} (\mathbf{X}^T \mathbf{X})^{-1} \mathbf{v}_c$  and  $\mathbf{X} = \sum_{j=1}^k \boldsymbol{\mu}_j \mathbf{v}_j^T + \mathbf{Q}$ . Thus

$$\hat{\mathbf{w}}_c^T \boldsymbol{\mu}_c = \|\boldsymbol{\mu}\|_2^2 \mathbf{v}_c^T (\mathbf{X}^T \mathbf{X})^{-1} \mathbf{v}_c + \sum_{m \neq c} \boldsymbol{\mu}_m^T \boldsymbol{\mu}_c \mathbf{v}_m^T (\mathbf{X}^T \mathbf{X})^{-1} \mathbf{v}_c + \mathbf{v}_c^T (\mathbf{X}^T \mathbf{X})^{-1} \mathbf{d}_c \text{ and}$$

$$\hat{\mathbf{w}}_j^T \boldsymbol{\mu}_c = \|\boldsymbol{\mu}\|_2^2 \mathbf{v}_j^T (\mathbf{X}^T \mathbf{X})^{-1} \mathbf{v}_c + \boldsymbol{\mu}_j^T \boldsymbol{\mu}_c \mathbf{v}_j^T (\mathbf{X}^T \mathbf{X})^{-1} \mathbf{v}_j + \sum_{m \neq c, j} \boldsymbol{\mu}_m^T \boldsymbol{\mu}_c \mathbf{v}_m^T (\mathbf{X}^T \mathbf{X})^{-1} \mathbf{v}_j + \mathbf{v}_j^T (\mathbf{X}^T \mathbf{X})^{-1} \mathbf{d}_c.$$

We have already obtained the bounds for  $\|\boldsymbol{\mu}\|_2^2 \mathbf{v}_c^T (\mathbf{X}^T \mathbf{X})^{-1} \mathbf{v}_c + \mathbf{v}_c^T (\mathbf{X}^T \mathbf{X})^{-1} \mathbf{d}_c - \|\boldsymbol{\mu}\|_2^2 \mathbf{v}_c^T (\mathbf{X}^T \mathbf{X})^{-1} \mathbf{v}_j - \mathbf{v}_j^T (\mathbf{X}^T \mathbf{X})^{-1} \mathbf{d}_c$  in Appendix E.1. Moreover, under the equal energy and priors assumption, the  $\mathbf{v}_j^T (\mathbf{X}^T \mathbf{X})^{-1} \mathbf{v}_j$  terms have the same bound for every  $j \in [k]$ . Similarly, the  $\mathbf{v}_j^T (\mathbf{X}^T \mathbf{X})^{-1} \mathbf{v}_m$  terms also have the same bound for all  $j \neq m \in [k]$ . An upper bound on classification error can then be derived in terms of the inner products between the mean vectors. We leave the detailed derivation to the reader. Expressions are naturally more complicated.

## E.2 Proof of Corollary 2

We now prove the condition for benign overfitting provided in Corollary 2. Note that following Theorem 2, we assume that

$$p > C_1 k^3 n \log(kn) + n - 1 \quad \text{and} \quad p > C_2 k^{1.5} n^{1.5} \|\boldsymbol{\mu}\|_2. \quad (62)$$

We begin with the setting where  $\|\boldsymbol{\mu}\|_2^2 > C \frac{kp}{n}$ , for some  $C > 1$ . In this case, we get that Eqn. (61) is lower bounded by  $\frac{1}{c} \left( \left(1 - \frac{C_3}{\sqrt{n}} - \frac{C_4 n}{p}\right) \|\boldsymbol{\mu}\|_2 - C_5 \sqrt{k} \right)^2$ , and we have

$$\begin{aligned} \left( \left(1 - \frac{C_3}{\sqrt{n}} - \frac{C_4 n}{p}\right) \|\boldsymbol{\mu}\|_2 - C_5 \sqrt{k} \right)^2 &> \|\boldsymbol{\mu}\|_2^2 - 2\|\boldsymbol{\mu}\|_2^2 \frac{C_3}{\sqrt{n}} - 2\|\boldsymbol{\mu}\|_2^2 \frac{C_4 n}{p} - 2C_5 \sqrt{k} \|\boldsymbol{\mu}\|_2 \\ &> \left(1 - \frac{2C_3}{\sqrt{n}}\right) \frac{kp}{n} - 2\|\boldsymbol{\mu}\|_2^2 \frac{C_4 n}{p} - 2C_5 \sqrt{k} \|\boldsymbol{\mu}\|_2. \end{aligned} \quad (63)$$

Then Eqn. (62) gives

$$\begin{aligned} (63) &> \left(1 - \frac{2C_3}{\sqrt{n}}\right) \frac{kp}{n} - \left(\frac{p}{k^{1.5} n^{1.5}}\right)^2 \frac{C_6 n}{p} - \frac{C_7 \sqrt{k} p}{k^{1.5} n^{1.5}} \\ &= \frac{kp}{n} \left(1 - \frac{2C_3}{\sqrt{n}} - \frac{C_6}{k^4 n} - \frac{C_7}{k^2 \sqrt{n}}\right), \end{aligned} \quad (64)$$

which goes to  $+\infty$  as  $\left(\frac{p}{n}\right) \rightarrow \infty$ .

Next, we consider the case  $\|\boldsymbol{\mu}\|_2^2 \leq \frac{kp}{n}$ . Moreover, we assume that  $\|\boldsymbol{\mu}\|_2^4 = C_2 \left(\frac{p}{n}\right)^\alpha$ , for  $\alpha > 1$ .

Then, Eqn. (61) is lower bounded by  $\frac{n}{ckp} \|\boldsymbol{\mu}\|_2^4 \left( \left(1 - \frac{C_3}{\sqrt{n}} - \frac{C_4 n}{p}\right) - \frac{C_5 \sqrt{k}}{\|\boldsymbol{\mu}\|_2} \right)^2$ , and we get

$$\begin{aligned} \frac{n}{kp} \|\boldsymbol{\mu}\|_2^4 \left( \left(1 - \frac{C_3}{\sqrt{n}} - \frac{C_4 n}{p}\right) - \frac{C_5 \sqrt{k}}{\|\boldsymbol{\mu}\|_2} \right)^2 &> \left(1 - \frac{2C_3}{\sqrt{n}}\right) \frac{n}{kp} \|\boldsymbol{\mu}\|_2^4 - \frac{C_6 n^2}{kp^2} \|\boldsymbol{\mu}\|_2^4 - \frac{C_7 n}{\sqrt{kp}} \|\boldsymbol{\mu}\|_2^3 \\ &\geq \left(1 - \frac{2C_3}{\sqrt{n}}\right) \frac{1}{k} \left(\frac{p}{n}\right)^{\alpha-1} - \frac{C_6}{k} \left(\frac{p}{n}\right)^{\alpha-2} - \frac{C_7}{\sqrt{k}} \left(\frac{p}{n}\right)^{0.75\alpha-1}, \end{aligned} \quad (65)$$

where the last inequality uses Equations (62) and condition  $\|\boldsymbol{\mu}\|_2^2 \leq \frac{kp}{n}$ . Consequently, the RHS of Eqn. (65) will go to  $+\infty$  as  $\left(\frac{p}{n}\right) \rightarrow \infty$ , provided that  $\alpha > 1$ . Overall, it suffices to have

$$\begin{aligned} p &> \max \left\{ C_1 k^3 n \log(kn) + n - 1, C_2 k^{1.5} n^{1.5} \|\boldsymbol{\mu}\|_2, \frac{n \|\boldsymbol{\mu}\|_2^2}{k} \right\}, \\ \text{and } \|\boldsymbol{\mu}\|_2^4 &\geq C_8 \left(\frac{p}{n}\right)^\alpha, \quad \text{for } \alpha \in (1, 2]. \end{aligned}$$

All of these inequalities hold provided that  $\|\boldsymbol{\mu}\|_2 = \Theta(p^\beta)$  for  $\beta \in (1/4, 1/2]$  for finite  $k$  and  $n$ . This completes the proof.  $\square$

## E.3 Error analysis for MLM

In this section, we present partial results on error analysis of the MNI classifier when data is generated by the MLM. Importantly, for this case we consider more general anisotropic structure in the covariance matrix  $\boldsymbol{\Sigma}$ , in accordance with typical benign overfitting analyses [BLLT20, MNS<sup>+</sup>20]. The analysis in this section builds non-trivially on analysis that was done for the binary case [MNS<sup>+</sup>20]. We start by carrying over the assumptions from that analysis, starting with the  $s$ -sparse assumption.

**Assumption 3** ( $s$ -sparse class means [MNS<sup>+</sup>20]). *We assume that all of the class means  $\boldsymbol{\mu}_c, c \in [k]$  are  $s$ -sparse in the basis given by the eigenvectors of  $\boldsymbol{\Sigma}$ . In other words, we have*

$$\mathbf{V}^{-1} \boldsymbol{\mu}_{c,j} = 0 \text{ if } j > s.$$

In addition to [MNS<sup>+</sup>20], this  $s$ -sparse assumption is also made in corresponding works on regression [HMRT19, TB20] and shown to be necessary for consistency of MSE of the minimum- $\ell_2$ -norm interpolation arising from bias. Next, we make a special assumption of bi-level structure in the covariance matrix for ease of statements of results, just as in [MNS<sup>+</sup>20].

**Assumption 4** (Bi-level ensemble [MNS<sup>+</sup>20]). We assume that the eigenvalues of the covariance matrix, given by  $\lambda$ , have a **bilevel** structure. In particular, our bi-level ensemble is parameterized by  $(n, m, q, r)$  where  $m > 1$ ,  $0 \leq r < 1$  and  $0 < q < (p - r)$ . We set parameters  $p := n^m$ ,  $s = n^r$  and  $a = n^{-q}$ . Then, the eigenvalues of the covariance matrix are given by

$$\lambda_j = \begin{cases} \lambda_H := \frac{ap}{s}, & 1 \leq j \leq s \\ \lambda_L := \frac{(1-a)p}{p-s}, & \text{otherwise.} \end{cases}$$

We will fix  $(m, q, r)$  and study the classification error as a function of  $n$ . While the bi-level ensemble structure is not in principle needed for complete statements of results, it admits particularly clean characterizations of classification error rates as well as easily interpretable conditions for consistency. See [MNS<sup>+</sup>20] for additional context on the bi-level ensemble and examples of its manifestation in high-dimensional machine learning models.

Finally, we imbue the above assumptions with an equal energy and orthogonality assumption, as in the GMM case. These assumptions are specific to the multiclass task, and effectively subsume Assumption 3.

**Assumption 5** (Equal energy and orthogonality). We assume that the class means are equal energy, i.e.  $\|\mu\|_2 = 1/\sqrt{\lambda_H}$  for all  $c \in [k]$ , and are orthogonal, i.e.  $\mu_i^\top \mu_j = 0$  for all  $i \neq j \in [k]$ . Together with Assumptions 3 and 4, a simple coordinate transformation gives us

$$\begin{aligned} \mu_c &= \frac{1}{\sqrt{\lambda_H}} e_{j_c} \text{ for some } j_c \in [s], j_c \neq j_{c'} \text{ for all } c \neq c' \in [k], \text{ and} \\ \Sigma &= \Lambda \end{aligned}$$

without loss of generality. The normalization by the factor  $\frac{1}{\sqrt{\lambda_H}}$  is done to ensure that the signal strength is equal to 1, i.e.  $\mathbb{E}[(\mathbf{x}^\top \mu_c)^2] = 1$  for all  $c \in [k]$ .

Under these assumptions, we state our main result for the total classification error of MLM. Our error bounds will be on the *excess* risk over and above the Bayes error rate incurred by the optimal classifier  $\{\hat{\mathbf{w}}_c = \mu_c\}_{c \in [k]}$ , which we denote by  $\mathbb{P}_{e, \text{Bayes}}$ .

**Theorem 6.** Under Assumptions 4 with  $q < 1 - r$  and 5, there are universal constants  $U, L_1, L_2$  such that the total excess classification error of the MNI under the MLM model is given by

$$\begin{aligned} \mathbb{P}_e - \mathbb{P}_{e, \text{Bayes}} &\leq k^2 \left( \frac{1}{2} - \frac{1}{\pi} \tan^{-1}(\text{SNR}(n)) \right), \text{ where} \\ \text{SNR}(n) &\geq L_1 \sqrt{\log n} \cdot n^{\frac{\min\{(m-1), (1-r)\}}{2}}, \quad 0 < q < (1 - r). \end{aligned}$$

Keeping  $k$  constant with respect to  $n$ , Theorem 6 implies benign overfitting in multiclass classification, i.e.  $\mathbb{P}_e - \mathbb{P}_{e, \text{Bayes}} \rightarrow 0$  as  $n \rightarrow \infty$ , if  $q < (1 - r)$ . Whether we can obtain consistency for the larger regime  $q < (1 - r) + \frac{(m-1)}{2}$ , as in the binary case [MNS<sup>+</sup>20], remains an open question: as we will see in the proof, multiclass analysis introduces several new terms that are more difficult to deal with than in the binary case.

We set up notation for important quantities in the analysis. Note that Assumption 5 directly implies that  $\mu_{c, j_c} = 1$  for all  $c \in [k]$ . For each class  $c \in [k]$ , we define the *survival* and *contamination* terms as below:

$$\text{SU}_c(n) := \sqrt{\lambda_H \hat{w}_{c, j_c}} \quad (66a)$$

$$\text{CN}_c(n) := \sqrt{\sum_{j \neq j_c} \lambda_j \hat{w}_{c, j}^2} \quad (66b)$$

Intuitively, we would like  $\text{SU}_c(n) \rightarrow 1$  and  $\text{CN}_c(n) \rightarrow 0$ ; note that this would be exactly the case if  $\hat{\mathbf{w}}_c = \mu_c$  for all  $c \in [k]$ . We state and prove our main lemma that characterizes the classification error in MLM as a function of survival and contamination.

**Lemma 12.** The excess classification risk is bounded by

$$\mathbb{P}_e - \mathbb{P}_{e, \text{Bayes}} \leq \sum_{c_1 < c_2} \left( \frac{1}{2} - \frac{1}{\pi} \tan^{-1} \left( \frac{\text{SU}_{c_1}(n) + \text{SU}_{c_2}(n) - \text{CN}_{c_1}(n) - \text{CN}_{c_2}(n)}{2(|\text{SU}_{c_1}(n) - \text{SU}_{c_2}(n)| + \text{CN}_{c_1}(n) + \text{CN}_{c_2}(n))} \right) \right) \quad (67)$$

*Proof.* We consider a fixed  $\mathbf{x}$ , and (following the notation in [TOS20]) the  $k$ -dimensional vectors

$$\begin{aligned}\mathbf{g} &:= [\mathbf{x}^\top \hat{\mathbf{w}}_1 \quad \mathbf{x}^\top \hat{\mathbf{w}}_2 \quad \dots \quad \mathbf{x}^\top \hat{\mathbf{w}}_k] \\ \mathbf{h} &:= [\mathbf{x}^\top \boldsymbol{\mu}_1 \quad \mathbf{x}^\top \boldsymbol{\mu}_2 \quad \dots \quad \mathbf{x}^\top \boldsymbol{\mu}_k]\end{aligned}$$

Further, we define the *multinomial logit* variable

$$Y(\mathbf{h}) = j \text{ w.p. } \frac{\exp\{h_j\}}{\sum_{m=1}^k \exp\{h_m\}}.$$

Recall that  $\mathbb{P}_e = \mathbb{P}(\arg \max(\mathbf{g}) \neq Y(\mathbf{h}))$ , where the probability is taken both over the fresh test sample  $\mathbf{x}$  and the randomness in the multinomial logit variable. We note that for there to be a classification error conditioned on  $\mathbf{x}$ , *at least* one of the following two events needs to hold: a)  $\arg \max(\mathbf{g}) \neq \arg \max(\mathbf{h})$ , or b)  $Y(\mathbf{h}) \neq \arg \max(\mathbf{h})$ . To see this, note that if neither a) nor b) held, we would have  $\arg \max(\mathbf{g}) = Y(\mathbf{h})$  and we would not have a classification error conditional on the covariate being  $\mathbf{x}$ . Thus, applying a union bound gives us

$$\begin{aligned}\mathbb{P}_e &\leq \mathbb{P}_{e,0} + \mathbb{P}_{e,\text{Bayes}} \text{ where} \\ \mathbb{P}_{e,0} &:= \mathbb{P}(\arg \max(\mathbf{g}) \neq \arg \max(\mathbf{h})) \text{ and} \\ \mathbb{P}_{e,\text{Bayes}} &:= \mathbb{P}(\arg \max(\mathbf{h}) \neq Y(\mathbf{h})).\end{aligned}$$

Thus, it suffices to provide an upper bound on  $\mathbb{P}_{e,0}$  as defined. We note that for there to be an error of the form  $\arg \max(\mathbf{g}) \neq \arg \max(\mathbf{h})$ , there *needs* to exist indices  $c_1, c_2 \in [k]$  (whose choice can depend on  $\mathbf{x}$ ) such that  $\mathbf{x}^\top \boldsymbol{\mu}_{c_1} \geq \mathbf{x}^\top \boldsymbol{\mu}_{c_2}$  but  $\mathbf{x}^\top \hat{\mathbf{w}}_{c_1} < \mathbf{x}^\top \hat{\mathbf{w}}_{c_2}$ . In other words, we have

$$\begin{aligned}\mathbb{P}_{e,0} &\leq \mathbb{P}(\mathbf{x}^\top \boldsymbol{\mu}_{c_1} \geq \mathbf{x}^\top \boldsymbol{\mu}_{c_2} \text{ and } \mathbf{x}^\top \hat{\mathbf{w}}_{c_1} < \mathbf{x}^\top \hat{\mathbf{w}}_{c_2} \text{ for some } c_1 \neq c_2) \\ &\leq \sum_{c_1 \neq c_2} \mathbb{P}(\mathbf{x}^\top \boldsymbol{\mu}_{c_1} \geq \mathbf{x}^\top \boldsymbol{\mu}_{c_2} \text{ and } \mathbf{x}^\top \hat{\mathbf{w}}_{c_1} < \mathbf{x}^\top \hat{\mathbf{w}}_{c_2}) \\ &= \sum_{c_1 < c_2} \mathbb{P}(\mathbf{x}^\top \boldsymbol{\Delta}_{c_1, c_2} \cdot \mathbf{x}^\top \hat{\boldsymbol{\Delta}}_{c_1, c_2} < 0)\end{aligned}$$

where we define

$$\begin{aligned}\boldsymbol{\Delta}_{c_1, c_2} &:= \boldsymbol{\mu}_{c_1} - \boldsymbol{\mu}_{c_2} \text{ and} \\ \hat{\boldsymbol{\Delta}}_{c_1, c_2} &:= \hat{\mathbf{w}}_{c_1} - \hat{\mathbf{w}}_{c_2}.\end{aligned}$$

Noting that  $\mathbf{x} \sim \mathcal{N}(\mathbf{0}, \boldsymbol{\Sigma})$ , setting  $\mathbf{E}_{c_1, c_2} := \boldsymbol{\Sigma}^{1/2} \boldsymbol{\Delta}_{c_1, c_2}$ ,  $\hat{\mathbf{E}}_{c_1, c_2} := \boldsymbol{\Sigma}^{1/2} \hat{\boldsymbol{\Delta}}_{c_1, c_2}$ , as well as using rotation invariance of the Gaussian distribution and Gaussian decomposition yields:

$$\mathbb{P}(\mathbf{x}^\top \boldsymbol{\Delta}_{c_1, c_2} \cdot \mathbf{x}^\top \hat{\boldsymbol{\Delta}}_{c_1, c_2} < 0) \tag{68}$$

$$\begin{aligned}&= \mathbb{P}_{\mathbf{g} \sim \mathcal{N}(\mathbf{0}, \mathbf{I})}(\mathbf{g}^\top \mathbf{E}_{c_1, c_2} \cdot \mathbf{g}^\top \hat{\mathbf{E}}_{c_1, c_2} < 0) \\ &= \mathbb{P}_{\substack{G \sim \mathcal{N}(0,1) \\ H \sim \mathcal{N}(0,1)}}(\|\mathbf{E}_{c_1, c_2}\|_2 G \cdot (\text{SU}(\hat{\boldsymbol{\Delta}}_{c_1, c_2}, \boldsymbol{\Delta}_{c_1, c_2})G + \text{CN}(\hat{\boldsymbol{\Delta}}_{c_1, c_2}, \boldsymbol{\Delta}_{c_1, c_2})H) < 0) \\ &= \mathbb{P}_{\substack{G \sim \mathcal{N}(0,1) \\ H \sim \mathcal{N}(0,1)}}((\text{SU}(\hat{\boldsymbol{\Delta}}_{c_1, c_2}, \boldsymbol{\Delta}_{c_1, c_2})G^2 + \text{CN}(\hat{\boldsymbol{\Delta}}_{c_1, c_2}, \boldsymbol{\Delta}_{c_1, c_2})HG) < 0) \\ &= \frac{1}{2} - \frac{1}{\pi} \tan^{-1} \left( \frac{\text{SU}(\hat{\boldsymbol{\Delta}}_{c_1, c_2}, \boldsymbol{\Delta}_{c_1, c_2})}{\text{CN}(\hat{\boldsymbol{\Delta}}_{c_1, c_2}, \boldsymbol{\Delta}_{c_1, c_2})} \right), \text{ where} \tag{69}\end{aligned}$$

$$\text{SU}(\hat{\boldsymbol{\Delta}}_{c_1, c_2}, \boldsymbol{\Delta}_{c_1, c_2}) := \frac{\hat{\mathbf{E}}_{c_1, c_2}^\top \mathbf{E}_{c_1, c_2}}{\|\mathbf{E}_{c_1, c_2}\|_2} = \frac{\hat{\boldsymbol{\Delta}}_{c_1, c_2}^\top \boldsymbol{\Sigma} \boldsymbol{\Delta}_{c_1, c_2}}{\|\boldsymbol{\Sigma}^{1/2} \boldsymbol{\Delta}_{c_1, c_2}\|_2} \text{ and}$$

$$\begin{aligned}\text{CN}(\hat{\boldsymbol{\Delta}}_{c_1, c_2}, \boldsymbol{\Delta}_{c_1, c_2}) &:= \sqrt{\|\hat{\mathbf{E}}_{c_1, c_2}\|_2^2 - \frac{(\hat{\mathbf{E}}_{c_1, c_2}^\top \mathbf{E}_{c_1, c_2})^2}{\|\mathbf{E}_{c_1, c_2}\|_2^2}} \\ &= \sqrt{\left( \hat{\boldsymbol{\Delta}}_{c_1, c_2} - \frac{\hat{\boldsymbol{\Delta}}_{c_1, c_2}^\top \boldsymbol{\Sigma} \boldsymbol{\Delta}_{c_1, c_2}}{\|\boldsymbol{\Sigma}^{1/2} \boldsymbol{\Delta}_{c_1, c_2}\|_2^2} \boldsymbol{\Delta}_{c_1, c_2} \right)^\top \boldsymbol{\Sigma} \left( \hat{\boldsymbol{\Delta}}_{c_1, c_2} - \frac{\hat{\boldsymbol{\Delta}}_{c_1, c_2}^\top \boldsymbol{\Sigma} \boldsymbol{\Delta}_{c_1, c_2}}{\|\boldsymbol{\Sigma}^{1/2} \boldsymbol{\Delta}_{c_1, c_2}\|_2^2} \boldsymbol{\Delta}_{c_1, c_2} \right)}\end{aligned}$$

denote the generalized survival and contamination terms respectively. For the equality in Equation (69), we used the fact that the ratio  $H/G$  of two independent standard normals follows the standard Cauchy distribution as in the proof of Proposition 1 in [MNS<sup>+</sup>20].

It remains to expand the terms  $\text{SU}(\hat{\Delta}_{c_1, c_2}, \Delta_{c_1, c_2})$  and  $\text{CN}(\hat{\Delta}_{c_1, c_2}, \Delta_{c_1, c_2})$ . First, we observe that

$$\begin{aligned} \text{SU}(\hat{\Delta}_{c_1, c_2}, \Delta_{c_1, c_2}) &= \frac{(\hat{\mathbf{w}}_{c_1} - \hat{\mathbf{w}}_{c_2})^\top \Sigma(\boldsymbol{\mu}_{c_1} - \boldsymbol{\mu}_{c_2})}{\|\Sigma^{1/2}(\boldsymbol{\mu}_{c_1} - \boldsymbol{\mu}_{c_2})\|_2} \\ &= \frac{(\hat{\mathbf{w}}_{c_1} - \hat{\mathbf{w}}_{c_2})^\top \Sigma(\boldsymbol{\mu}_{c_1} - \boldsymbol{\mu}_{c_2})}{\sqrt{2}} \\ &= \sqrt{\lambda_H}(\hat{w}_{c_1, j_{c_1}} + \hat{w}_{c_2, j_{c_2}} - \hat{w}_{c_1, j_{c_2}} - \hat{w}_{c_2, j_{c_1}}) \\ &= \text{SU}_{c_1}(n) + \text{SU}_{c_2}(n) - \sqrt{\lambda_H} \cdot \hat{w}_{c_1, j_{c_2}} - \sqrt{\lambda_H} \cdot \hat{w}_{c_2, j_{c_1}} \\ &\geq \text{SU}_{c_1}(n) + \text{SU}_{c_2}(n) - \text{CN}_{c_1}(n) - \text{CN}_{c_2}(n), \end{aligned}$$

where the last inequality follows because we have  $\text{CN}_{c_1}(n) := \sqrt{\sum_{j \neq j_{c_1}} \lambda_j \hat{w}_j^2} \geq |\sqrt{\lambda_H} \hat{w}_{j_{c_2}}|$ .

Similar reasoning holds for the term  $\text{CN}_{c_2}(n)$ . Note that we have critically used the orthogonality assumption, which implies that  $j_{c_1} \neq j_{c_2}$ .

Second, we analyze the contamination term  $\text{CN}(\hat{\Delta}_{c_1, c_2}, \Delta_{c_1, c_2})$ . We denote  $\hat{\Delta} := \hat{\Delta}_{c_1, c_2}$  and  $\Delta := \Delta_{c_1, c_2}$  for shorthand. We have

$$\text{CN}(\hat{\Delta}_{c_1, c_2}, \Delta_{c_1, c_2}) = \sqrt{\mathbb{E}[B(\mathbf{x})^2]} \quad \text{where} \quad B(\mathbf{x}) := \left( \hat{\Delta} - \frac{\hat{\Delta}^\top \Sigma \Delta}{\|\Sigma^{1/2} \Delta\|_2^2} \Delta \right)^\top \mathbf{x}.$$

We characterize the orthogonal term  $\hat{\Delta} - \frac{\hat{\Delta}^\top \Sigma \Delta}{\|\Sigma^{1/2} \Delta\|_2^2} \Delta$ . By simple algebra, we get

$$\left( \hat{\Delta} - \frac{\hat{\Delta}^\top \Sigma \Delta}{\|\Sigma^{1/2} \Delta\|_2^2} \Delta \right)_j = \begin{cases} \frac{\hat{w}_{c_1, j_{c_1}} - \hat{w}_{c_2, j_{c_2}} + \hat{w}_{c_1, j_{c_2}} - \hat{w}_{c_2, j_{c_1}}}{2} & \text{if } j = j_{c_1} \\ \frac{\hat{w}_{c_1, j_{c_1}} - \hat{w}_{c_2, j_{c_2}} + \hat{w}_{c_1, j_{c_2}} - \hat{w}_{c_2, j_{c_1}}}{2} & \text{if } j = j_{c_2} \\ \hat{w}_{c_1, j} - \hat{w}_{c_2, j} & \text{otherwise.} \end{cases}$$

This gives us

$$\begin{aligned} \Sigma^{1/2} \left( \hat{\Delta} - \frac{\hat{\Delta}^\top \Sigma \Delta}{\|\Sigma^{1/2} \Delta\|_2^2} \Delta \right) &= \frac{\sqrt{\lambda_H} \hat{w}_{c_1, j_{c_1}} - \sqrt{\lambda_H} \hat{w}_{c_2, j_{c_2}}}{2} (\hat{\mathbf{e}}_{j_{c_1}} + \hat{\mathbf{e}}_{j_{c_2}}) \\ &\quad + \Sigma^{1/2} \left( \sum_{j \neq j_{c_1}, j_{c_2}} \hat{w}_{c_1, j} \hat{\mathbf{e}}_j \right) - \Sigma^{1/2} \left( \sum_{j \neq j_{c_1}, j_{c_2}} \hat{w}_{c_2, j} \hat{\mathbf{e}}_j \right) \\ &\quad + \frac{\sqrt{\lambda_H} (\hat{w}_{c_1, j_{c_2}} - \hat{w}_{c_2, j_{c_1}})}{2} (\hat{\mathbf{e}}_{j_{c_1}} + \hat{\mathbf{e}}_{j_{c_2}}). \end{aligned}$$

Since  $\sqrt{\mathbb{E}[B(\mathbf{x})^2]} = \|\Sigma^{1/2} \left( \hat{\Delta} - \frac{\hat{\Delta}^\top \Sigma \Delta}{\|\Sigma^{1/2} \Delta\|_2^2} \Delta \right)\|_2$ , applying the triangle inequality and recalling the survival and contamination terms in Equations (66), then gives us

$$\begin{aligned} \text{CN}(\hat{\Delta}_{c_1, c_2}, \Delta_{c_1, c_2}) &\leq \frac{1}{\sqrt{2}} (\text{SU}_{c_1}(n) - \text{SU}_{c_2}(n)) + \left( 1 + \frac{1}{\sqrt{2}} \right) (\text{CN}_{c_1}(n) + \text{CN}_{c_2}(n)) \\ &\leq 2(\text{SU}_{c_1}(n) - \text{SU}_{c_2}(n) + \text{CN}_{c_1}(n) + \text{CN}_{c_2}(n)). \end{aligned}$$

This completes the proof.  $\square$

Next, we provide characterizations of  $\text{SU}_c(n)$  and  $\text{CN}_c(n)$  in the multiclass case. These constitute extensions from Lemmas 11 and 13 [MNS<sup>+</sup>20] to deal with two new aspects of the MLM: the multiclass setting, and label noise generated by the logistic model (note that [MNS<sup>+</sup>20] considered only constant label noise whose magnitude does not depend on the covariate). We start with the characterization of survivals.

**Lemma 13** (extension of Lemma 11, [MNS<sup>+</sup>20]). *There exist universal positive constants  $L_1, L_2, U_1, U_2$  such that*

$$\begin{aligned} \text{SU}^L(n) &\leq \text{SU}_c(n) \leq \text{SU}^U(n), \text{ where} \\ \text{SU}^L(n) &:= \begin{cases} c_k(1 + L_1 n^{q-(1-r)})^{-1}, & 0 < q < 1-r \\ c_k L_2 n^{(1-r)-q}, & q > 1-r. \end{cases} \\ \text{SU}^U(n) &:= \begin{cases} c_k(1 + U_1 n^{q-(1-r)})^{-1}, & 0 < q < 1-r \\ c_k U_2 n^{(1-r)-q}, & q > 1-r. \end{cases} \end{aligned}$$

Above,  $c_k > 0$  is a fixed strictly positive constant that depends on  $k$  but not on  $n$ .

Next, we provide an upper-bound characterization of contamination.

**Lemma 14** (extension of Lemma 13, [MNS<sup>+</sup>20]). *There exist universal positive constants  $U_3, U_4$  such that*

$$\text{CN}_c(n) \leq \text{CN}^U(n) := \begin{cases} U_3 \sqrt{\log n} \cdot n^{-\frac{\min\{m-1, 1-r\}}{2}}, & 0 < q < 1-r \\ U_4 \sqrt{\log n} \cdot n^{-\frac{\min\{m-1, 2q+r-q\}}{2}}, & q > 1-r. \end{cases}$$

Taking Lemmas 13 and 14 as true for the moment, we get

$$\mathbb{P}_{e,0} \leq k^2 \left( \frac{1}{2} - \tan^{-1} \left( \frac{2\text{SU}^L(n) - 2\text{CN}^U(n)}{2|\text{SU}^U(n) - \text{SU}^L(n)| + 2\text{CN}^U(n)} \right) \right).$$

The new term of particular interest is  $|\text{SU}^U(n) - \text{SU}^L(n)|$ . When  $0 < q < 1-r$ , we have

$$\begin{aligned} |\text{SU}^U(n) - \text{SU}^L(n)| &= \frac{c_k}{1 + L_1 n^{q-(1-r)}} - \frac{c_k}{1 + U_1 n^{q-(1-r)}} \\ &\leq c_k(U_1 - L_1)n^{q-(1-r)}. \end{aligned}$$

Then, the argument within  $\tan^{-1}(\cdot)$  is lower bounded by

$$\begin{aligned} &\frac{2c(1 + L_1 n^{q-(1-r)})^{-1} - 2U_3 \sqrt{\log n} n^{-\frac{\min\{m-1, 1-r\}}{2}}}{c(U_1 - L_1)n^{q-(1-r)} + 2U_3 \sqrt{\log n} n^{-\frac{\min\{m-1, 1-r\}}{2}}} \\ &\geq L_3 n^{\frac{\min\{m-1, 1-r\}}{2}}, \end{aligned}$$

where  $L_3 > 0$  is some universal positive constant. This completes the proof for the case  $0 < q < 1-r$ . Further, this term goes to  $\infty$  as  $n \rightarrow \infty$ , implying that  $\mathbb{P}_e \rightarrow 0$  as  $n \rightarrow \infty$  in this case.

It only remains to prove Lemmas 13 and 14, which we do below.

### E.3.1 Proof of Lemma 13

The proof follows similarly to the proof of Theorem 4 in Appendix D.3 and Lemma 11 in Appendix E of [MNS<sup>+</sup>20], with two important extensions: one, to the multiclass model, and two, considering the logistic model for label noise. First, an identical series of steps to the proof of Theorem 4 gives us

$$\text{SU}_c(n) = \frac{\lambda_{j_c} \cdot \mathbf{u}_{j_c}^\top \mathbf{A}_{-j_c}^{-1} \mathbf{z}_c}{1 + \lambda_{j_c} \cdot \mathbf{u}_{j_c}^\top \mathbf{A}_{-j_c}^{-1} \mathbf{u}_{j_c}}.$$

As with the proof of Theorem 4 in [MNS<sup>+</sup>20], we can bound the quadratic forms around their expectations by using the Hanson-Wright inequality [RV<sup>+</sup>13], thereby getting

$$\begin{aligned} \text{SU}_c(n) &\leq c_k \cdot \frac{\lambda_{j_c} \left( \frac{(n-s)}{c\bar{\lambda}_{s+1}r_s(\boldsymbol{\Sigma}_{-j_c})} - \frac{c_3 n^{3/4}}{\lambda_{s+1}r_s(\boldsymbol{\Sigma})} \right)}{1 + \lambda_{j_c} \left( \frac{cn}{\bar{\lambda}_{s+1}r_s(\boldsymbol{\Sigma}_{-j_c})} + \frac{c_4 n^{3/4}}{\lambda_{s+1}r_s(\boldsymbol{\Sigma})} \right)} \text{ and} \\ \text{SU}_c(n) &\geq c_k \cdot \frac{\lambda_{j_c} \left( \frac{cn}{\bar{\lambda}_{s+1}r_s(\boldsymbol{\Sigma}_{-j_c})} + \frac{c_3 n^{3/4}}{\lambda_{s+1}r_s(\boldsymbol{\Sigma})} \right)}{1 + \lambda_{j_c} \left( \frac{(n-s)}{c\bar{\lambda}_{s+1}r_s(\boldsymbol{\Sigma}_{-j_c})} - \frac{c_4 n^{3/4}}{\lambda_{s+1}r_s(\boldsymbol{\Sigma})} \right)}, \end{aligned}$$

where we define  $c_k := \mathbb{E}[u_{j_c,1} z_{c,1}]$ . Plugging this into an identical argument as in the proof of Lemma 11 in Appendix E of [MNS<sup>+</sup>20] gives us the statement of Lemma 13. It remains to show that  $c_k$  is strictly positive (clearly, it will not depend on  $n$  or  $p$ ). To do this, we critically utilize the orthogonality and equal-weight Assumption 5 as well as the details of the MLM. We combine these to get

$$\mathbb{P}\left(z_{j_c,1} = \frac{k-1}{k} \mid \{u_{j,1}\}_{j=1}^p\right) = \frac{\exp(u_{j_c,1})}{\sum_{c' \in [k]} \exp(u_{j_{c'},1})},$$

where  $\{u_{j_{c'},1}\}_{c' \in [k]}$  are IID standard Gaussian. Thus, we get

$$\begin{aligned} \mathbb{E}[u_{j_c,1} z_{c,1}] &= \mathbb{E}\left[u_{j_c,1} \left(\frac{k-1}{k} \cdot \frac{\exp(u_{j_c,1})}{\sum_{c' \in [k]} \exp(u_{j_{c'},1})}\right) - \frac{1}{k} \left(1 - \frac{\exp(u_{j_c,1})}{\sum_{c' \in [k]} \exp(u_{j_{c'},1})}\right)\right] \\ &= \mathbb{E}\left[u_{j_c,1} \left(\frac{\exp(u_{j_c,1})}{\sum_{c' \in [k]} \exp(u_{j_{c'},1})}\right)\right]. \end{aligned}$$

Now, we overload notation and write  $U_c := u_{j_c,1}$  for each  $c \in [k]$ . We also write  $\mathbf{U} := [U_1 \dots U_k]$  as shorthand. Note that  $U_c$  i.i.d.  $\sim \mathcal{N}(0, 1)$ . By symmetry, we have

$$\begin{aligned} c_k &= \mathbb{E}\left[\frac{U_1 e^{U_1}}{\sum_{c=1}^k e^{U_c}}\right] \\ &= \frac{1}{k} \mathbb{E}[\mathbf{U}^\top g(\mathbf{U})] \\ &= \mathbb{E}[U_1 \cdot g(\mathbf{U})] \end{aligned}$$

where  $g_i(\mathbf{U}) := \frac{e^{U_i}}{\sum_{i'=1}^k e^{U_{i'}}}$ . Then, applying Stein's lemma, we get

$$\begin{aligned} \mathbb{E}[U_1 \cdot g(\mathbf{U})] &= \sum_{i=1}^n \mathbb{E}[U_1 U_i] \cdot \mathbb{E}\left[\frac{\partial g}{\partial U_i}\right] \\ &= \mathbb{E}\left[\frac{\partial g}{\partial U_1}\right] \\ &= \mathbb{E}\left[\frac{\sum_{i \neq 1} e^{U_1 + U_i}}{(\sum_{i=1}^k e^{U_i})^2}\right] > 0. \end{aligned}$$

The last step follows because the argument inside the expectation can never take value 0 and is always non-negative. This completes the proof.  $\square$

### E.3.2 Proof of Lemma 14

This proof is a simple extension of the argument in [MNS<sup>+</sup>20, Theorem 5]. First, we recall that

$$\tilde{\mathbf{w}}_c := \mathbf{X}(\mathbf{X}^T \mathbf{X})^{-1} \mathbf{z}_c.$$

As a direct consequence (following the proof of [MNS<sup>+</sup>20, Lemma 6]), we get

$$\begin{aligned} \text{CN}_c(n) &= \sqrt{\mathbf{z}_c^\top \mathbf{C} \mathbf{z}_c}, \text{ where} \\ \mathbf{C} &:= (\mathbf{X}^T \mathbf{X})^{-1} \left( \sum_{j=1, j \neq j_c}^d \lambda_j^2 \mathbf{u}_j \mathbf{u}_j^\top \right) (\mathbf{X}^T \mathbf{X})^{-1} \end{aligned}$$

where  $\{\mathbf{u}_j\}_{j=1}^p$  denotes the rows of data matrix  $\mathbf{X}$  normalized by  $\sqrt{\lambda_j}$ . We now define  $\mathbf{A} := \mathbf{X}^T \mathbf{X}$  for shorthand, and  $\mathbf{A}_{-j_c} := \sum_{j=1, j \neq j_c}^d \lambda_j \mathbf{u}_j \mathbf{u}_j^\top$  as the “leave-one-out” matrix. Note that these

matrices are functionals of the training data covariates, and so are common across all classes. Further, again following the proof of [MNS<sup>+</sup>20, Lemma 6], we get

$$\begin{aligned}\text{CN}_c(n) &= \sqrt{\tilde{\mathbf{z}}_c^\top \tilde{\mathbf{C}} \tilde{\mathbf{z}}_c}, \text{ where} \\ \tilde{\mathbf{z}}_c &:= \mathbf{z}_c - \text{SU}_c(n) \mathbf{u}_c \text{ and} \\ \tilde{\mathbf{C}} &:= (\mathbf{A}_{-j_c})^{-1} \left( \sum_{j=1, j \neq j_c}^d \lambda_j^2 \mathbf{u}_j \mathbf{u}_j^\top \right) (\mathbf{A}_{-j_c})^{-1}\end{aligned}$$

Now, an identical argument to the proof of [MNS<sup>+</sup>20, Lemma 29] gives us

$$\begin{aligned}\tilde{\mathbf{z}}_c^\top \tilde{\mathbf{C}} \tilde{\mathbf{z}}_c &\leq 2\mathbf{z}_c^\top \tilde{\mathbf{C}} \mathbf{z}_c + 2\text{SU}_c(n)^2 \cdot \mathbf{u}_{j_c}^\top \tilde{\mathbf{C}} \mathbf{u}_{j_c} \\ &\leq 4\text{Tr}(\tilde{\mathbf{C}}) \left( 1 + \frac{1}{c} \right) \cdot \log n,\end{aligned}$$

where  $c$  is some universal positive constant. The last inequality follows as a critical consequence of three facts:

1. We have  $\text{SU}_c(n) \leq 1$  almost surely.
2. Noting that  $\mathbf{u}_{j_c}$  is isotropic Gaussian, we have  $\mathbf{u}_{j_c}^\top \tilde{\mathbf{C}} \mathbf{u}_{j_c} \leq 2\text{Tr}(\tilde{\mathbf{C}}) \left( 1 + \frac{1}{c} \right) \cdot \log n$  with high probability from an application of the Hanson-Wright inequality [RV<sup>+</sup>13].
3. Noting that the Hanson-Wright inequality also applies to sub-Gaussian random vectors with uncorrelated components [RV<sup>+</sup>13], we similarly apply it to  $\mathbf{z}_c$  by noting that  $z_{c,j}^2 \leq 1$  and  $\mathbb{E}[z_{c,j} z_{c,j'}] = 0$  for all  $j \neq j'$ . The  $z_{c,j}$ 's being uncorrelated is an important consequence of the orthogonality Assumption 5 and independence of training data.

After this, an analysis identical to that of the binary case (contained in Appendices D.4.2 and Lemma 13 of [MNS<sup>+</sup>20]) completes the proof of the result.  $\square$

## F Recursive formulas for higher-order quadratic forms

We first show how quadratic forms involving the  $j$ -th order Gram matrix  $\mathbf{A}_j^{-1}$  can be expressed using quadratic forms involving the  $(j-1)$ -th order Gram matrix  $\mathbf{A}_{j-1}^{-1}$ . For concreteness, we consider  $j=1$ ; identical expressions hold for any  $j>1$  with the only change being in the superscripts. Recall from Appendix C that we can write

$$\mathbf{A}_1 = \mathbf{A}_0 + \begin{bmatrix} \|\boldsymbol{\mu}\|_2 \mathbf{v}_1 & \mathbf{Q}^T \boldsymbol{\mu}_1 & \mathbf{v}_1 \end{bmatrix} \begin{bmatrix} \|\boldsymbol{\mu}\|_2 \mathbf{v}_1^T \\ \mathbf{v}_1^T \mathbf{Q} \\ \boldsymbol{\mu}_1^T \end{bmatrix} = \mathbf{Q}^T \mathbf{Q} + \begin{bmatrix} \|\boldsymbol{\mu}\|_2 \mathbf{v}_1 & \mathbf{d}_1 & \mathbf{v}_1 \end{bmatrix} \begin{bmatrix} \|\boldsymbol{\mu}\|_2 \mathbf{v}_1^T \\ \mathbf{v}_1^T \\ \mathbf{d}_1^T \end{bmatrix}.$$

The first step is to derive an expression for  $\mathbf{A}_1^{-1}$ . By the Woodbury identity [HJ12], we get

$$\mathbf{A}_1^{-1} = \mathbf{A}_0^{-1} - \mathbf{A}_0^{-1} \begin{bmatrix} \|\boldsymbol{\mu}\|_2 \mathbf{v}_1 & \mathbf{d}_1 & \mathbf{v}_1 \end{bmatrix} \left[ \mathbf{I} + \begin{bmatrix} \|\boldsymbol{\mu}\|_2 \mathbf{v}_1^T \\ \mathbf{v}_1^T \\ \mathbf{d}_1^T \end{bmatrix} \mathbf{A}_0^{-1} \begin{bmatrix} \|\boldsymbol{\mu}\|_2 \mathbf{v}_1 & \mathbf{d}_1 & \mathbf{v}_1 \end{bmatrix} \right]^{-1} \begin{bmatrix} \|\boldsymbol{\mu}\|_2 \mathbf{v}_1^T \\ \mathbf{v}_1^T \\ \mathbf{d}_1^T \end{bmatrix} \mathbf{A}_0^{-1}. \quad (70)$$

We first compute the inverse of the  $3 \times 3$  matrix  $\mathbf{B} := \left[ \mathbf{I} + \begin{bmatrix} \|\boldsymbol{\mu}\|_2 \mathbf{v}_1^T \\ \mathbf{v}_1^T \\ \mathbf{d}_1^T \end{bmatrix} \mathbf{A}_0^{-1} \begin{bmatrix} \|\boldsymbol{\mu}\|_2 \mathbf{v}_1 & \mathbf{d}_1 & \mathbf{v}_1 \end{bmatrix} \right]$ .

Recalling our definitions of the terms  $s_{mj}^{(c)}$ ,  $h_{mj}^{(c)}$  and  $t_{mj}^{(c)}$  in Eqn. (28) in Appendix C, we have:

$$\mathbf{B} = \begin{bmatrix} 1 + \|\boldsymbol{\mu}\|_2^2 s_{11}^{(0)} & \|\boldsymbol{\mu}\|_2 h_{11}^{(0)} & \|\boldsymbol{\mu}\|_2 s_{11}^{(0)} \\ \|\boldsymbol{\mu}\|_2 s_{11}^{(0)} & 1 + h_{11}^{(0)} & s_{11}^{(0)} \\ \|\boldsymbol{\mu}\|_2 h_{11}^{(0)} & t_{11}^{(0)} & 1 + h_{11}^{(0)} \end{bmatrix}.$$

Recalling  $\mathbf{B}^{-1} = \frac{1}{\det_0} \text{adj}(\mathbf{B})$ , where  $\det_0$  is the determinant of  $\mathbf{B}$  and  $\text{adj}(\mathbf{B})$  is the adjoint of  $\mathbf{B}$ , simple algebra gives us

$$\det_0 = s_{11}^{(0)}(\|\boldsymbol{\mu}\|_2^2 - t_{11}^{(0)}) + (h_{11}^{(0)} + 1)^2,$$

and

$$\text{adj}(\mathbf{B}) = \begin{bmatrix} (h_{11}^{(0)} + 1)^2 - s_{11}^{(0)} t_{11}^{(0)} & \|\boldsymbol{\mu}\|_2(s_{11}^{(0)} t_{11}^{(0)} - h_{11}^{(0)} - h_{11}^{(0)2}) & -\|\boldsymbol{\mu}\|_2 s_{11}^{(0)} \\ -\|\boldsymbol{\mu}\|_2 s_{11}^{(0)} & h_{11}^{(0)} + 1 + \|\boldsymbol{\mu}\|_2^2 s_{11}^{(0)} & -s_{11}^{(0)} \\ \|\boldsymbol{\mu}\|_2(s_{11}^{(0)} t_{11}^{(0)} - h_{11}^{(0)} - h_{11}^{(0)2}) & \|\boldsymbol{\mu}\|_2^2 h_{11}^{(0)2} - t_{11}^{(0)}(1 + \|\boldsymbol{\mu}\|_2^2 s_{11}^{(0)}) & h_{11}^{(0)} + 1 + \|\boldsymbol{\mu}\|_2^2 s_{11}^{(0)} \end{bmatrix}.$$

We will now use these expressions to derive expressions for the 1-order quadratic forms that are used in Appendix C.4.

### F.1 Expressions for 1-st order quadratic forms

We now show how quadratic forms of order 1 can be expressed as a function of quadratic forms of order 0. All of the expressions are derived as a consequence of plugging in the expression for  $\mathbf{B}^{-1}$  together with elementary matrix algebra.

First, we have

$$\begin{aligned} s_{mk}^{(1)} &= \mathbf{v}_m^T \mathbf{A}_1^{-1} \mathbf{v}_k = \mathbf{v}_m^T \mathbf{A}_0^{-1} \mathbf{v}_k - \begin{bmatrix} \|\boldsymbol{\mu}\|_2 s_{m1}^{(0)} & h_{m1}^{(0)} & s_{m1}^{(0)} \end{bmatrix} \frac{\text{adj}(\mathbf{B})}{\det_0} \begin{bmatrix} \|\boldsymbol{\mu}\|_2 s_{k1}^{(0)} \\ s_{k1}^{(0)} \\ h_{k1}^{(0)} \end{bmatrix} \\ &= s_{mk}^{(0)} - \frac{1}{\det_0} (\star)_s^{(0)}, \end{aligned} \quad (71)$$

where we define

$$(\star)_s^{(0)} := (\|\boldsymbol{\mu}\|_2^2 - t_{11}^{(0)}) s_{1k}^{(0)} s_{1m}^{(0)} + s_{1m}^{(0)} h_{k1}^{(0)} h_{11}^{(0)} + s_{1k}^{(0)} h_{m1}^{(0)} h_{11}^{(0)} - s_{11}^{(0)} h_{k1}^{(0)} h_{m1}^{(0)} + s_{1m}^{(0)} h_{k1}^{(0)} + s_{1k}^{(0)} h_{m1}^{(0)}.$$

Thus, for the case  $m = k$  we have

$$\begin{aligned} s_{kk}^{(1)} &= \mathbf{v}_k^T \mathbf{A}_1^{-1} \mathbf{v}_k = \mathbf{v}_k^T \mathbf{A}_0^{-1} \mathbf{v}_k - \begin{bmatrix} \|\boldsymbol{\mu}\|_2 s_{k1}^{(0)} & h_{k1}^{(0)} & s_{k1}^{(0)} \end{bmatrix} \frac{\text{adj}(\mathbf{B})}{\det_0} \begin{bmatrix} \|\boldsymbol{\mu}\|_2 s_{k1}^{(0)} \\ s_{k1}^{(0)} \\ h_{k1}^{(0)} \end{bmatrix} \\ &= s_{kk}^{(0)} - \frac{1}{\det_0} \left( (\|\boldsymbol{\mu}\|_2^2 - t_{11}^{(0)}) s_{1k}^{(0)2} + 2s_{1k}^{(0)} h_{k1}^{(0)} h_{11}^{(0)} - s_{11}^{(0)} h_{k1}^{(0)2} + 2s_{1k}^{(0)} h_{k1}^{(0)} \right). \end{aligned} \quad (72)$$

Next, we have

$$\begin{aligned} h_{mk}^{(1)} &= \mathbf{v}_m^T \mathbf{A}_1^{-1} \mathbf{d}_k = \mathbf{v}_m^T \mathbf{A}_0^{-1} \mathbf{d}_k - \begin{bmatrix} \|\boldsymbol{\mu}\|_2 s_{m1}^{(0)} & h_{m1}^{(0)} & s_{m1}^{(0)} \end{bmatrix} \frac{\text{adj}(\mathbf{B})}{\det_0} \begin{bmatrix} \|\boldsymbol{\mu}\|_2 h_{1k}^{(0)} \\ h_{1k}^{(0)} \\ t_{1k}^{(0)} \end{bmatrix} \\ &= h_{mk}^{(0)} - \frac{1}{\det_0} (\star)_h^{(0)}, \end{aligned} \quad (73)$$

where we define

$$(\star)_h^{(0)} = (\|\boldsymbol{\mu}\|_2^2 - t_{11}^{(0)}) s_{1m}^{(0)} h_{1k}^{(0)} + h_{m1}^{(0)} h_{1k}^{(0)} h_{11}^{(0)} + h_{m1}^{(0)} h_{1k}^{(0)} + s_{1m}^{(0)} t_{k1}^{(0)} + s_{1m}^{(0)} t_{k1}^{(0)} h_{11}^{(0)} - s_{11}^{(0)} t_{k1}^{(0)} h_{m1}^{(0)}.$$

Next, we have

$$\begin{aligned} t_{km}^{(1)} &= \mathbf{d}_k^T \mathbf{A}_1^{-1} \mathbf{d}_m = \mathbf{d}_k^T \mathbf{A}_0^{-1} \mathbf{d}_m - \begin{bmatrix} \|\boldsymbol{\mu}\|_2 h_{1k}^{(0)} & t_{1k}^{(0)} & h_{1k}^{(0)} \end{bmatrix} \frac{\text{adj}(\mathbf{B})}{\det_0} \begin{bmatrix} \|\boldsymbol{\mu}\|_2 h_{1m}^{(0)} \\ h_{1m}^{(0)} \\ t_{1m}^{(0)} \end{bmatrix} \\ &= t_{km}^{(0)} - \frac{1}{\det_0} (\star)_t^{(0)}, \end{aligned} \quad (74)$$

where we define

$$(\star)_t^{(0)} = (\|\boldsymbol{\mu}\|_2^2 - t_{11}^{(0)})h_{1m}^{(0)}h_{1k}^{(0)} + t_{m1}^{(0)}h_{1k}^{(0)}h_{11}^{(0)} + t_{k1}^{(0)}h_{1m}^{(0)}h_{11}^{(0)} + t_{1m}^{(0)}h_{1k}^{(0)} + t_{1k}^{(0)}h_{1m}^{(0)} - s_{11}^{(0)}t_{1m}^{(0)}t_{1k}^{(0)}.$$

Thus, for the case  $m = k$  we have

$$\begin{aligned} t_{kk}^{(1)} &= \mathbf{d}_k^T \mathbf{A}_1^{-1} \mathbf{d}_k = \mathbf{d}_k^T \mathbf{A}_0^{-1} \mathbf{d}_k - \begin{bmatrix} \|\boldsymbol{\mu}\|_2 h_{1k}^{(0)} & t_{1k}^{(0)} & h_{1k}^{(0)} \end{bmatrix} \frac{\text{adj}(\mathbf{B})}{\det_0} \begin{bmatrix} \|\boldsymbol{\mu}\|_2 h_{1k}^{(0)} \\ h_{1k}^{(0)} \\ t_{1k}^{(0)} \end{bmatrix} \\ &= t_{kk}^{(0)} - \frac{1}{\det_0} \left( (\|\boldsymbol{\mu}\|_2^2 - t_{11}^{(0)})h_{1k}^{(0)2} + 2t_{1k}^{(0)}h_{1k}^{(0)}h_{11}^{(0)} - s_{11}^{(0)}t_{1k}^{(0)2} + 2t_{1k}^{(0)}h_{1k}^{(0)} \right). \end{aligned} \quad (75)$$

Next, we have

$$\begin{aligned} f_{ki}^{(1)} &= \mathbf{d}_k^T \mathbf{A}_1^{-1} \mathbf{e}_i = \mathbf{d}_k^T \mathbf{A}_0^{-1} \mathbf{e}_i - \begin{bmatrix} \|\boldsymbol{\mu}\|_2 h_{1k}^{(0)} & t_{1k}^{(0)} & h_{1k}^{(0)} \end{bmatrix} \frac{\text{adj}(\mathbf{B})}{\det_0} \begin{bmatrix} \|\boldsymbol{\mu}\|_2 g_{1i}^{(0)} \\ g_{1i}^{(0)} \\ f_{1i}^{(0)} \end{bmatrix} \\ &= f_{ki}^{(0)} - \frac{1}{\det_0} (\star)_f^{(0)}, \end{aligned} \quad (76)$$

where we define

$$(\star)_f^{(0)} = (\|\boldsymbol{\mu}\|_2^2 - t_{11}^{(0)})h_{1k}^{(0)}g_{1i}^{(0)} + t_{1k}^{(0)}g_{1i}^{(0)} + t_{1k}^{(0)}h_{11}^{(0)}g_{1i}^{(0)} + h_{1k}^{(0)}f_{1i}^{(0)} + h_{1k}^{(0)}h_{11}^{(0)}f_{1i}^{(0)} - s_{11}^{(0)}t_{1k}^{(0)}f_{1i}^{(0)}.$$

Finally, we have

$$\begin{aligned} g_{ji}^{(1)} &= \mathbf{v}_j^T \mathbf{A}_1^{-1} \mathbf{e}_i = \mathbf{v}_j^T \mathbf{A}_0^{-1} \mathbf{e}_i - \begin{bmatrix} \|\boldsymbol{\mu}\|_2 s_{j1}^{(0)} & h_{j1}^{(0)} & s_{j1}^{(0)} \end{bmatrix} \frac{\text{adj}(\mathbf{B})}{\det_0} \begin{bmatrix} \|\boldsymbol{\mu}\|_2 g_{1i}^{(0)} \\ g_{1i}^{(0)} \\ f_{1i}^{(0)} \end{bmatrix} \\ &= g_{ji}^{(0)} - \frac{1}{\det_0} (\star)_{gj}^{(0)}, \end{aligned} \quad (77)$$

where we define

$$(\star)_{gj}^{(0)} = (\|\boldsymbol{\mu}\|_2^2 - t_{11}^{(0)})s_{1j}^{(0)}g_{1i}^{(0)} + g_{1i}^{(0)}h_{11}^{(0)}h_{j1}^{(0)} + g_{1i}^{(0)}h_{j1}^{(0)} + s_{1j}^{(0)}f_{1i}^{(0)} + s_{1j}^{(0)}h_{11}^{(0)}f_{1i}^{(0)} - s_{11}^{(0)}h_{j1}^{(0)}f_{1i}^{(0)}.$$

□

## G One-vs-all SVM

In this section, we derive conditions under which the OvA solutions  $\mathbf{w}_{\text{OVA},c}$  interpolate, i.e, all data points are support vectors in Eqn. (4).

### G.1 Gaussian mixture model

As in the case of the multiclass SVM, we assume equal priors on the class means and equal energy (Assumption 1).

**Theorem 7.** *Assume that the training set follows a multiclass GMM with noise covariance  $\boldsymbol{\Sigma} = \mathbf{I}_p$  and Assumption 1 holds. Then, there exist constants  $c_1, c_2, c_3 > 1$  and  $C_1, C_2 > 1$  such that the solutions of the OvA-SVM and MNI are identical with probability at least  $1 - \frac{c_1}{n} - c_2 k e^{-\frac{n}{c_3 k^2}}$  provided that*

$$p > C_1 k n \log(kn) + n - 1 \quad \text{and} \quad p > C_2 n^{1.5} \|\boldsymbol{\mu}\|_2. \quad (78)$$

We can compare Eqn. (78) with the corresponding condition for multiclass SVM in Theorem 2 (Eqn. (16)). Observe that the right-hand-side of Eqn. (78) above does not scale with  $k$ , while the right-hand-side of Eqn. (16) scales with  $k$  as  $k^3$ . Otherwise, the scalings with  $n$  and energy of class means  $\|\boldsymbol{\mu}\|_2$  are identical. This discrepancy with respect to  $k$ -dependence arises because the multiclass SVM is equivalent to the OvA-SVM in Eqn. (24) with unequal margins  $1/k$  and  $(k-1)/k$  (as we showed in Thm. 1).

*Proof sketch.* Recall from Appendix C that we derived conditions under which the multiclass SVM interpolates the training data by studying the related symmetric OvA-type classifier defined in Eqn. (11). Thus, this proof is similar to the proof of Theorem 2 provided in Appendix C.2. The only difference is that the margins for the OvA-SVM are not  $1/k$  and  $(k-1)/k$ , but 1 for all classes. Owing to the similarity between the arguments, we restrict ourselves to a proof sketch here.

Following Appendix C.2 and Eqn. (35), we consider  $y_i = k$ . We will derive conditions under which the condition

$$((1 + h_{kk}^{(-k)})g_{ki}^{(-k)} - s_{kk}^{(-k)}f_{ki}^{(-k)}) + C \sum_{j \neq k} ((1 + h_{jj}^{(-j)})g_{ji}^{(-j)} - s_{jj}^{(-j)}f_{ji}^{(-j)}) > 0, \quad (79)$$

holds with high probability for some  $C > 1$ . We define

$$\epsilon := \frac{n^{1.5} \|\boldsymbol{\mu}\|_2}{p} \leq \tau,$$

where  $\tau$  is chosen to be a sufficiently small constant. Applying the same trick as in Lemma 2 (with the newly defined parameters  $\epsilon$  and  $\tau$ ) gives us with probability at least  $1 - \frac{c_1}{n} - c_2 k e^{-\frac{n}{c_3 k^2}}$ :

$$\begin{aligned} (79) &\geq \left( \left(1 - \frac{C_1 \epsilon}{\sqrt{k} \sqrt{n}}\right) \left(1 - \frac{1}{C_2}\right) \frac{1}{p} - \frac{C_3 \epsilon}{n} \cdot \frac{n}{kp} \right) - \frac{k}{C_4} \left( \left(1 + \frac{C_5 \epsilon}{\sqrt{k} \sqrt{n}}\right) \frac{1}{kp} - \frac{C_6 \epsilon}{n} \cdot \frac{n}{kp} \right) \\ &\geq \left( 1 - \frac{1}{C_9} - \frac{C_{10} \epsilon}{\sqrt{k} \sqrt{n}} - \frac{C_{11} \epsilon}{k} - C_{12} \epsilon \right) \frac{1}{p} \\ &\geq \frac{1}{p} \left( 1 - \frac{1}{C_9} - C_0 \tau \right), \end{aligned} \quad (80)$$

for some constants  $C_i$ 's  $> 1$ . We used the fact that  $|g_{ji}^{(0)}| \leq (1/C)(1/(kp))$  for  $j \neq y_i$  with probability at least  $1 - \frac{c_1}{n} - c_2 k e^{-\frac{n}{c_3 k^2}}$  provided that  $p > C_1 k n \log(kn) + n - 1$ , which is the first sufficient condition in the theorem statement.  $\square$

## G.2 Multinomial logistic model

Recall that we defined the data covariance matrix  $\boldsymbol{\Sigma} = \sum_{i=1}^p \lambda_i \mathbf{v}_i \mathbf{v}_i^T = \mathbf{V} \boldsymbol{\Lambda} \mathbf{V}^T$  and its spectrum  $\boldsymbol{\lambda} = [\lambda_1 \ \dots \ \lambda_p]$ . We also defined the effective dimensions  $d_2 := \frac{\|\boldsymbol{\lambda}\|_1^2}{\|\boldsymbol{\lambda}\|_2}$  and  $d_\infty := \frac{\|\boldsymbol{\lambda}\|_1}{\|\boldsymbol{\lambda}\|_\infty}$ .

The following result provides sufficient conditions under which the OvA SVM and MNI classifier have the same solution with high probability under the MLM.

**Theorem 8.** *Assume that the training set follows a multiclass MLM. There exist constants  $c$  and  $C_1, C_2 > 1$  such that, if the following conditions hold:*

$$d_\infty > C_1 n \log(kn) \text{ and } d_2 > C_2 (\log(kn) + n), \quad (81)$$

*the solutions of the OvA-SVM and MNI are identical with probability at least  $(1 - \frac{c}{n})$ . In the special case of isotropic covariance, the same result holds provided that*

$$p > 10n \log(\sqrt{k}n) + n - 1, \quad (82)$$

Comparing this result to the corresponding results in Theorems 3 and 4, we observe that  $k$  now only appears in the log function (as a result of  $k$  union bounds). Thus, the unequal  $1/k$  and  $(k-1)/k$  margins that appear in the multiclass-SVM make interpolation harder than with the OvA-SVM, just as in the GMM case.

*Proof sketch.* For the OvA SVM classifier, we need to solve  $k$  binary max-margin classification problems, hence the proof follows directly from [MNS<sup>+</sup>20, Theorem 1] and [HMX21, Theorem 1] by applying  $k$  union bounds. We omit the details for brevity.  $\square$

## H One-vs-one SVM

In this section, we first derive conditions under which the OvO solutions interpolate, i.e, all data points are support vectors. We then provide an upper bound on the classification error of the OvO solution.

In OvO classification, we solve  $k(k-1)/2$  binary classification problems, e.g., for classes pair  $(c, j)$ , we solve

$$\mathbf{w}_{\text{OvO},(c,j)} := \arg \min_{\mathbf{w}} \|\mathbf{w}\|_2 \quad \text{sub. to } \mathbf{w}^T \mathbf{x}_i \geq 1, \text{ if } \mathbf{y}_i = c; \quad \mathbf{w}^T \mathbf{x}_i \leq -1 \text{ if } \mathbf{y}_i = j, \quad \forall i \in [n]. \quad (83)$$

Then we apply these  $k(k-1)/2$  classifiers to a fresh sample and the class that got the highest +1 voting gets predicted.

We now present conditions under which every data point becomes a support vector over these  $k(k-1)/2$  problems. We again assume equal priors on the class means and equal energy (Assumption 1).

**Theorem 9.** *Assume that the training set follows a multiclass GMM with noise covariance  $\Sigma = \mathbf{I}_p$  and Assumption 1 holds. Then, there exist constants  $c_1, c_2, c_3 > 1$  and  $C_1, C_2 > 1$  such that the solutions of the OvA-SVM and MNI are identical with probability at least  $1 - \frac{c_1}{n} - c_2 k e^{-\frac{n}{c_3 k^2}}$  provided that*

$$p > C_1 n \log(kn) + (2n/k) - 1 \quad \text{and} \quad p > C_2 n^{1.5} \|\boldsymbol{\mu}\|_2. \quad (84)$$

*Proof sketch.* Note that the margins of OvO SVM are 1 and  $-1$ , hence the proof is similar to the proof of Theorem 7. Recall that in OvO SVM, we solve  $k(k-1)/2$  binary problems and each problems has sample size  $2n/k$  with high probability. Therefore, compared to OvA SVM which solves  $k$  problems each with sample size  $n$ , OvO SVM needs less overparameterization to achieve interpolation. Thus the first condition in Eqn. (78) reduces to  $p > C_1 n \log(kn) + (2n/k) - 1$ .  $\square$

We now derive the classification risk for OvO SVM classifiers. Recall that OvO classification solves  $k(k-1)/2$  binary subproblems. Specifically, for each pair of classes, say  $(i, j) \in [k] \times [k]$ , we train a classifier  $\mathbf{w}_{ij} \in \mathbb{R}^p$  and the corresponding decision rule for a fresh sample  $\mathbf{x} \in \mathbb{R}^p$  is  $\hat{y}_{ij} = \text{sign}(\mathbf{x}^T \hat{\mathbf{w}}_{ij})$ . Overall, each class  $i \in [k]$  gets a voting score  $s_i = \sum_{j \neq i} \mathbf{1}_{\hat{y}_{ij}=+1}$ . Thus, the final decision is given by majority rule that decides the class with the highest score, i.e.,  $\arg \max_{i \in [k]} s_i$ . Having described the classification process, the total classification error  $\mathbb{P}_e$  for balanced classes is given by the conditional error  $\mathbb{P}_{e|c}$  given the fresh sample belongs to class  $c$ . Without loss of generality, we assume  $c = 1$ . Formally,  $\mathbb{P}_e = \mathbb{P}_{e|1} = \mathbb{P}_{e|1}(s_1 < s_2 \text{ or } s_1 < s_3 \text{ or } \dots \text{ or } s_1 < s_k)$ . Under the equal prior and energy assumption, by symmetry and union bound, the conditional classification risk given that true class is 1 can be upper bounded as:

$$\begin{aligned} & \mathbb{P}_{e|1}(s_1 < s_2 \text{ or } s_1 < s_3 \text{ or } \dots \text{ or } s_1 < s_k) \\ & \leq \mathbb{P}_{e|1}(s_1 < k-1) = \mathbb{P}_{e|1}(\exists j \text{ s.t. } \hat{y}_{1j} \neq 1) \leq (k-1) \mathbb{P}_{e|1}(\hat{y}_{12} \neq 1). \end{aligned}$$

Therefore, it suffices to bound  $\mathbb{P}_{e|1}(\hat{y}_{12} \neq 1)$ . We can directly apply Theorem 5 with changing  $k$  to 2 and  $n$  to  $2n/k$ .

**Theorem 10.** *Let Assumption 2 and the condition in Eqn. (84) hold. Further assume constants  $C_1, C_2, C_3 > 1$  such that  $(1 - C_1 \sqrt{\frac{k}{n}} - \frac{C_2 n}{kp}) \|\boldsymbol{\mu}\|_2 > C_3$ . Then, there exist additional constants  $c_1, c_2, c_3$  and  $C_4 > 1$  such that the OvO SVM solutions satisfies:*

$$\mathbb{P}_{e|c} \leq (k-1) \exp \left( -\frac{\|\boldsymbol{\mu}\|_2^2 \left( \left( 1 - C_1 \sqrt{\frac{k}{n}} - \frac{C_2 n}{kp} \right) \|\boldsymbol{\mu}\|_2 - C_3 \right)^2}{C_4 \left( \|\boldsymbol{\mu}\|_2^2 + \frac{kp}{n} \right)} \right) \quad (85)$$

with probability at least  $1 - \frac{c_1}{n} - c_2 k e^{-\frac{n}{c_3 k^2}}$ , for every  $c \in [k]$ . Moreover, the same bound holds for the total classification error  $\mathbb{P}_e$ .
